# Supplementary material
Source: PubMed Central journal article supplement (PMC3982738)
Supplement: supp_pp.114.236323_236323Figure_S2.pdf [file supp_pp.114.236323_236323Figure_S2.pdf]

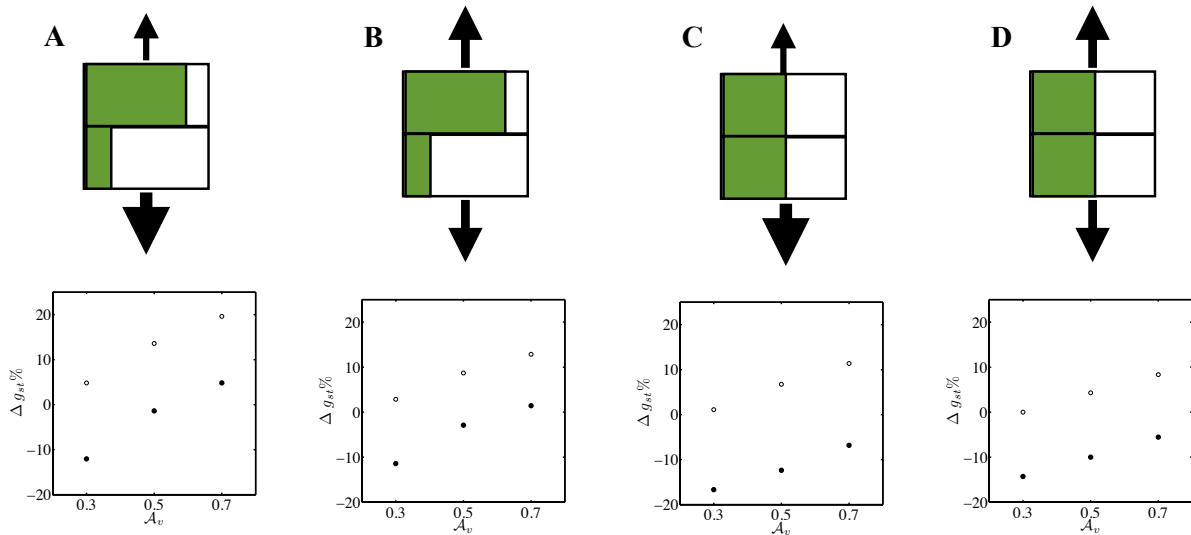

Figure S2 Percentage increases in total stomatal conductance for sunflower simulations with the assumption of a regulated, constant epidermal potential, as a function of total volumetric airspace, and symmetry or asymmetry between upper and lower domains in stomatal conductance and air fraction. Closed circles are the initial response from  $SR = 160$  to  $SR = 200$ , and open circles the response after ambient air temperature compensation to conserve initial lower epidermal temperature. **A** asymmetric  $g_s$  and air fraction; **B** symmetric  $g_s$ , asymmetric air fraction; **C** asymmetric  $g_s$ , symmetric air fraction; **C** symmetric  $g_s$  and air fraction. For total air fractions of 0.3, 0.5 and 0.7, asymmetric fractions were (upper/lower) 0.1/0.5, 0.2/0.8, and 0.5/0.9 respectively. Asymmetric  $g_s$  varied to satisfy the initial state, but were in general twice as large on the lower (abaxial) surface.
