# Supplementary material
Source: PubMed Central journal article supplement (PMC3982738)
Supplement: supp_pp.114.236323_236323Supplemental_Text_S2.pdf [file supp_pp.114.236323_236323Supplemental_Text_S2.pdf]

# Supplemental Text S2: Expanded derivation for the competition between liquid and vapor transport in leaves

*F.E. Rockwell<sup>1</sup>, N.M. Holbrook<sup>2</sup>, and A. Stroock<sup>1</sup>*

<sup>1</sup>School of Chemical and Biomolecular Engineering, Cornell University, Ithaca, NY 14853, USA.

<sup>2</sup>Harvard University, Dept. of Organismic and Evolutionary Biology

January 19, 2014

# 1 Non-isothermal water vapor and liquid transport in leaves

## 2 Conservation of thermal energy and molecules in leaf tissue and air space

3 The flux of thermal energy  $\mathbf{E}$  in the presence of a molecular flux  $\mathbf{J}$  is given by the sum of  
4 the heat flux due to conduction  $\mathbf{q}$  and the convection of enthalpy ( $\bar{h}$ , enthalpy per molecule)  
5 due to the net transport of molecules,

$$\mathbf{E} = \mathbf{q} + \mathbf{J}\bar{h}. \quad (1)$$

6 Conservation of energy then requires no local accumulation at steady state, leading to

$$\nabla \cdot \mathbf{E} = 0, \quad (2)$$

7 which says that the divergence, or local change, in the heat flux at steady state must be zero.  
8 In the presence of a local volumetric heat source,  $\dot{Q}$ , the conservation statement becomes,

$$0 = -(\nabla \cdot \mathbf{E}) + \dot{Q}, \quad (3)$$

9 which says that the divergence of the heat flux must balance the local production of heat.  
10 The combination of (1) and (3), and then expanding the divergence of the convective term,  
11 leads to,

$$0 = -(\nabla \cdot \mathbf{q}) - (\nabla \cdot (\mathbf{J}\bar{h})) + \dot{Q}, \quad (4)$$

$$0 = -(\nabla \cdot \mathbf{q}) - (\bar{h} \nabla \cdot \mathbf{J} + \mathbf{J} \cdot \nabla \bar{h}) + \dot{Q}. \quad (5)$$

12 The first part of the expanded term represents the change in the rate of local energy accu-  
13 mulation due to a change in the molecular flux, while the second accounts for the change  
14 due to a change in the enthalpy of the molecules in flux. In order to understand the physical  
15 meaning of these terms, it is helpful to recall the definition of the enthalpy of a substance as  
16 its internal energy  $U$ , plus the work required to make room  $V$  for it within an environment  
17 at some pressure  $P$ , or  $H = U + PV$ . The molar enthalpy recasts this relation in terms of  
18 quantities per mole,  $\bar{h} = \bar{u} + p\bar{v}$ . The differential form is then given by,

$$d\bar{h} = d\bar{u} + p d\bar{v} + \bar{v} dp = c_p(T) dT + \left[ \bar{v} - T \left( \frac{\partial \bar{v}}{\partial T} \right)_p \right] dp. \quad (6)$$

19 For an ideal gas, substituting in the gas law shows that the term in brackets vanishes, and  
20 the  $\bar{h}$  is a function of temperature only. Treating the liquid phase as incompressible over the  
21 range of temperatures and pressures of interest, the change in enthalpies of the two phases  
22 can be written,

$$d\bar{h}_v = c_{p,v}(T) dT, \quad d\bar{h}_l = c_{p,l}(T) dT + \bar{v} dp_l. \quad (7)$$

23 Here  $p_l$  refers to the pressure in a pure phase of the liquid. For an impure phase, such  
24 as water inhabiting the cellular solid fraction, we can regard  $p_l$  as a pressure potential, or  
25 the pressure in a pure phase that would bring it into equilibrium with the cellular water.  
26 We can then write this pressure in terms of an isothermal change in chemical potential

27 due to pressure,  $\bar{v} dp_l = [d\mu]_T$ , or, following the convention in plant water relations, use the  
 28 definition of water potential  $\psi$ ,  $\mu = \bar{v}\psi$ , to describe the variations in enthalpy due to changes  
 29 in the pressure potential of the liquid as,

$$d\bar{h}_l = c_{p,l}(T) dT + \bar{v} d\psi. \quad (8)$$

30 In defining  $\psi$  in this way, we are ignoring temperature induced variation in water potential,  
 31 which is reasonable for variations in temperature of a few degrees or less, as for an impure  
 32 phase the temperature sensitive term ( $\bar{v} RT \ln a$ ) depends only on the absolute temperature,  
 33 and not the gradient.

We now apply these ideas to a representative volume composed of a continuous, porous liquid-filled elastic solid (liquid phase) interspersed with a continuous air space (the vapor phase). We consider that over the expected range of potential changes the volume changes of the cells (the liquid phase) are small, a few percent, and so neglect changes of dimension. With  $\mathcal{A}$  as the area fraction of a phase, and the subscripts  $l$  and  $v$  referencing the liquid and vapor phases respectively, conservation of thermal energy (5) becomes,

$$0 = -\mathcal{A}_l(\nabla \cdot \mathbf{q}_l) - \mathcal{A}_v(\nabla \cdot \mathbf{q}_v) - \mathcal{A}_l(\bar{h}_l \nabla \cdot \mathbf{J}_l + \mathbf{J}_l \cdot (c_{p,l} \nabla T + \bar{v} \nabla \psi)) \\ - \mathcal{A}_v(\bar{h}_v \nabla \cdot \mathbf{J}_v + \mathbf{J}_v \cdot c_{p,v} \nabla T) + \dot{Q}. \quad (9)$$

34 Conservation of the number of water molecules in steady state requires that the divergence  
 35 of the total flux be zero (the flux into a representative volume balances the flux out). In  
 36 terms of the individual phases,

$$0 = -(\nabla \cdot \mathbf{J}_{total}) = -\mathcal{A}_l(\nabla \cdot \mathbf{J}_l) - \mathcal{A}_v(\nabla \cdot \mathbf{J}_v), \quad (10)$$

$$\mathcal{A}_l(\nabla \cdot \mathbf{J}_l) = -\mathcal{A}_v(\nabla \cdot \mathbf{J}_v). \quad (11)$$

This last equation says that in steady state, water molecules may change phase, but conservation of the total number of water molecules requires that an increase in the flux of molecules in one phase is equal to a decline of the flux in the other. Using (11) we can then write (9) as,

$$0 = -\mathcal{A}_l(\nabla \cdot \mathbf{q}_l) - \mathcal{A}_v(\nabla \cdot \mathbf{q}_v) + \mathcal{A}_l(\nabla \cdot \mathbf{J}_l)(\bar{h}_v - \bar{h}_l) \\ - (\mathcal{A}_l c_{p,l} \mathbf{J}_l + \mathcal{A}_v c_{p,v} \mathbf{J}_v) \cdot \nabla T - \mathcal{A}_l \mathbf{J}_l \bar{v} \cdot \nabla \psi + \dot{Q}. \quad (12)$$

37 The difference in enthalpy between the two phases,  $(\bar{h}_v - \bar{h}_l)$ , accounts for the thermal energy  
 38 required to move water molecules from the liquid to the vapor phase. For an isobaric phase  
 39 change, across the coexistence line for the pure liquid and vapor with a flat interface, this  
 40 energy difference defines the molar heat of vaporization at constant pressure  $\bar{\lambda}_p$ ,

$$\bar{\lambda}_p = \int_0^T (c_{p,v}(T) - c_{p,l}(T)) dT. \quad (13)$$

41 When the pressure in the liquid deviates from the vapor pressure at the coexistence line, the  
 42 difference in enthalpy becomes,

$$\bar{\lambda} = \int_0^T (c_{p,v}(T) - c_{p,l}(T)) dT - \bar{v}(p_l - p_{sat}(T)) = \bar{\lambda}_p - \bar{v}(p_l - p_{sat}(T)). \quad (14)$$

43 Here,  $p_{sat}(T)$ , is the pressure in a pure vapor and liquid given by the coexistence line for a  
 44 given temperature (i.e., saturated vapor pressure, as given by Lemmon et al. (2013)). Given  
 45 that  $p_{sat}(T)$  is on the order of kpa, for  $p_l$  on there order of a MPa, we can simplify (14) by  
 46 evaluating the temperature dependent saturated reference pressure term at some reference  
 47 temperature that characterizes the system,  $p_o = p_{sat}(T_o)$ .

48 However, for many purposes the pressure correction will be small and may as well be  
 49 neglected. For many leaves,  $\psi\bar{v}$  is on the order of tens of J mol<sup>-1</sup>, while  $\bar{\lambda}_p$  is 44 kJ mol<sup>-1</sup>  
 50 at 25 °C, and it will suffice to let  $\bar{\lambda} \approx \bar{\lambda}_p$ .

## 51 Reduction of dimensions: local equilibrium between liquid and vapor

52 In order to reduce the transport equations to one dimension in the principal direction of  
 53 the flux (i.e., from the vascular plane through the leaf thickness to the upper and lower leaf  
 54 surfaces), we idealize the vasculature as a continuous plane of delivery, and stomatal conduc-  
 55 tance as smoothly distributed across an epidermis. With these assumptions, in steady-state  
 56 we can then expect that the vapor and liquid phases are in ‘local equilibrium’ within-plane  
 57 (i.e., in planes normal to the leaf thickness), and the only gradients in temperature, water  
 58 potential and vapor pressure are through the leaf thickness in  $z$ . Under these conditions, the  
 59 standard boundary conditions of thermal and chemical equilibrium at a liquid-vapor inter-  
 60 face extends throughout planes normal to the flux. To find the vapor pressure in the pore  
 61 space, we begin by integrating the Clausius-Clapeyron from a known point  $(T_o, p_o)$  on the  
 62 vapor-liquid coexistence line for pure water (Kittel & Kroemer 1980), to find the saturated  
 63 vapor pressure  $p_{sat}$  at some temperature  $T$ ,

$$p_{sat}(T) = p_{sat}(T_o) \exp \left[ -\frac{\bar{\lambda}_p(T_o)}{R} \left( \frac{1}{T} - \frac{1}{T_o} \right) \right]. \quad (15)$$

64 On the coexistence line for a pure substance described by Clausius-Clapeyron, the pressure  
 65 in the fluid and the pressure in vapor are the same. In general, we are interested in the  
 66 situation where the vapor pressure is a partial pressure, and the gas phase as a whole is in  
 67 mechanical equilibrium with the liquid phase, at atmospheric pressure. Setting the chemical  
 68 potentials of the liquid and gas phase equal (as for co-existent phases),

$$\mu_l = \mu_v = \mu^*(T) + RT \ln \left( \frac{p}{p_{sat}(T)} \right), \quad (16)$$

69 where  $p$  is now exclusively the vapor pressure. Re-arrangement yields a general form of the  
 70 Kelvin equation for the reduction in vapor pressure above a fluid due to an isothermal  
 71 deviation in the chemical potential from a reference state defined by the coexistence line  
 72 (Pickard 1981; Wheeler & Stroock 2009);

$$p(\mu_l, T) = p_{sat}(T) \exp \left[ \frac{[\Delta\mu_l]_T}{RT} \right], \quad [\Delta\mu_l]_T = \mu_l - \mu^*(T). \quad (17)$$

73 We can then combine (15) and (17), divide both sides by  $p_{atm}$ , and define the reference mole  
 74 fraction  $\chi_o \equiv p_{sat}(T_o)/p_{atm}$ . The resulting form we will refer to as the Clausius-Clapeyron-  
 75 Kelvin equation for the mole fraction of water vapor,  $\chi$ , in a gas held at atmospheric pressure

76 and in local equilibrium with a liquid phase,

$$\chi(\mu_l, T) = \chi_o \exp \left[ -\frac{\bar{\lambda}_p(T_o)}{R} \left( \frac{1}{T} - \frac{1}{T_o} \right) + \frac{[\Delta\mu_l]_T}{RT} \right], \quad \chi_o \equiv \frac{p_{sat}(T_o)}{p_{atm}}. \quad (18)$$

77 The definition of the chemical potential for an incompressible liquid phase,

$$\mu_l = \mu^*(T) + (p_l - p_{sat}(T)) \bar{v} + RT \ln a_l = \psi \bar{v}, \quad (19)$$

referenced to the coexistence line, leads to equivalent forms of (18) in terms of the pressure (for a pure liquid), or more generally the water (or pressure) potential,  $\psi$ ,

$$\chi(p_l, T) = \chi_o \exp \left[ -\frac{\bar{\lambda}_p(T_o)}{R} \left( \frac{1}{T} - \frac{1}{T_o} \right) + \frac{(p_l - p_{sat}(T)) \bar{v}}{RT} \right] \quad (20)$$

$$\chi(\psi, T) = \chi_o \exp \left[ -\frac{\bar{\lambda}_p(T_o)}{R} \left( \frac{1}{T} - \frac{1}{T_o} \right) + \frac{[\Delta\psi]_T \bar{v}}{RT} \right] \quad (21)$$

78 The inconvenience of having the reference state as a function of temperature motivates  
 79 the approximation  $p_o \equiv p_{sat}(T_o) \approx p_{sat}(T)$ , justified whenever the isothermal deviations in  
 80 liquid pressure are large in magnitude relative to  $p_o - p_{sat}(T)$ . Observing the convention  
 81 of taking atmospheric pressure as the reference pressure for water potential, and with the  
 82 understanding that  $\psi$  represents isothermal departures in water potential from that reference  
 83 state, we arrive at,

$$\chi(\psi, T) = \chi_o \exp \left( -\frac{\bar{\lambda}_p}{R} \left( \frac{1}{T} - \frac{1}{T_o} \right) + \left( \frac{(\psi + p_{atm} - p_o) \bar{v}}{RT} \right) \right). \quad (22)$$

With  $\psi=0$  Pa, the above equation provides the mole fraction of water vapor in air at atmospheric pressure in equilibrium with pure water across a flat interface. With respect to the energy conservation equation (12), the form of the difference in molar enthalpies between the two phases consistent with (20) is given by (14), and for (18, 21, 22) by:

$$\bar{\lambda} = \bar{\lambda}_p - [\Delta\mu_l]_T, \quad (23)$$

$$= \bar{\lambda}_p - [\Delta\psi]_T \bar{v}, \quad (24)$$

$$\approx \bar{\lambda}_p - (\psi + p_{atm} - p_o) \bar{v}. \quad (25)$$

84 As noted above, for leaves, the difference between  $\bar{\lambda}_p$  and  $\bar{\lambda}$  will be only 1% or less. An  
 85 approximate form of (22) can then be written with the reference mole fraction of water  
 86 vapor defined for air spaces at atmospheric pressure (tabulated in Nobel, 2005),

$$\chi(\psi, T) = \chi_o(T_o, p_{atm}) \exp \left( -\frac{\bar{\lambda}}{R} \left( \frac{1}{T} - \frac{1}{T_o} \right) + \left( \frac{\psi \bar{v}}{RT} \right) \right). \quad (26)$$

## 87 **Linearization of the dependence of vapor mole fractions on temperature and** 88 **potential**

89 For a leaf, the gradients in temperature and liquid phase potential within a leaf are expected  
 90 to be less than 2°C and 2 MPa (Yianoulis & Tyree 1984), and under these conditions we

91 can linearize the partial derivatives of  $\chi$  with respect to temperature and potential with an  
 92 expected error of less than 1%. Linearizing about the reference state temperature  $T_o$  and  
 93 the characteristic potential  $\psi_o$ , we denote the constant partial derivatives as  $\chi_\psi$  and  $\chi_T$ ,

$$\chi_\psi \equiv \left. \frac{\partial \chi}{\partial \psi} \right|_{T_o, \psi_o} = \frac{\chi(T_o, \psi_o) \bar{v}}{RT_o}, \quad (27)$$

$$\chi_T \equiv \left. \frac{\partial \chi}{\partial T} \right|_{T_o, \psi_o} = \frac{\chi(T_o, \psi_o) \bar{\lambda}}{RT_o^2}. \quad (28)$$

94 where we have used (25) evaluated at  $\psi_o$  to define the latent heat. The gradient in water  
 95 vapor mole fraction through the leaf thickness can then be expressed,

$$\frac{\partial \chi}{\partial z} \approx \chi_\psi \frac{\partial \psi}{\partial z} + \chi_T \frac{\partial T}{\partial z}. \quad (29)$$

96 Alternatively, (22) may be linearized for small variations by taking logs of both sides, and  
 97 approximating the natural log as the argument minus one,

$$\ln \left( \frac{\chi(T, \psi)}{\chi_o} \right) \approx \left( \frac{\chi(T, \psi)}{\chi_o} \right) - 1 \quad (30)$$

$$\frac{\chi(T, \psi)}{\chi_o} \approx 1 - \frac{\bar{\lambda}_p}{R} \left( \frac{1}{T} - \frac{1}{T_o} \right) + \frac{(\psi + p_{atm} - p_o) \bar{v}}{RT}, \quad (31)$$

98 Taking the partial derivatives and evaluating them as before leads to,

$$\left. \frac{\partial \chi}{\partial T} \right|_{(T_o, \psi_o)} \approx \frac{(\bar{\lambda}_p - (\psi_o + p_{atm} - p_o) \bar{v}) \chi_o}{RT_o^2} \approx \frac{\bar{\lambda} \chi_o}{RT_o^2}, \quad \left. \frac{\partial \chi}{\partial \psi} \right|_{T_o} \approx \frac{\chi_o \bar{v}}{RT_o}, \quad (32)$$

99 where we have again used (25) to define  $\bar{\lambda}$ . Comparing (32) to (27) and (28) shows they  
 100 have same form, differing only in that the  $\chi$  that appears in the former is a function of the  
 101 temperature only - it is the  $\chi$  given by the coexistence line of pure water liquid and vapor-  
 102 whereas the former takes into account the (potential) pressure of the liquid phase being  
 103 something other than the vapor pressure. At 25°C, and -1 MPa, the difference in the two  
 104 representations of the partial derivatives is less than 1%. Here we proceed using (27) and  
 105 (28).

## 106 Flux descriptions

107 We now turn to description of the fluxes of vapor, liquid and heat. The appropriate one  
 108 dimensional form of Fick's law for the non-isothermal flux of species  $a$  diffusing in species  $b$   
 109 at constant pressure is given by (Bird et al. 1960),

$$J_a = -c(T) D_{ab}(T) \frac{\partial \chi_a}{\partial z} + \chi_a (J_a + J_b). \quad (33)$$

110 where  $J_a$  is the total flux of  $a$ , and the first term on the RHS describes the diffusive flux  
 111 and the second term the convective flux, the mole fraction of  $a$  times the total molecular

112 flux. Ignoring the depletion of  $CO_2$  by photosynthesis in the cells, we regard the air as a  
 113 stagnant gas with zero total flux ( $J_b = 0$ ), which with water vapor as species  $a$  and all the  
 114 components of dry air as species  $b$  leads to,

$$J_v = -\frac{c(T)D_v(T)}{(1-\chi)}\frac{\partial\chi}{\partial z}. \quad (34)$$

115 The nonlinearity in (34) arises from the fact that the evaporation of water molecules into  
 116 stagnant air results in a small convective flux. From the perspective of the air molecules,  
 117 in steady state convection balances the equi-molar diffusive flux of air opposite to the water  
 118 vapor diffusive flux, such that the net movement of air molecules is zero. The error in the  
 119 vapor flux arising from neglecting convection is proportional to the mole fraction of water  
 120 vapor itself, such that at  $20^\circ C$  the error is only about 2%, rising to almost 6% at  $35^\circ C$ .  
 121 In addition, the temperature dependencies of  $c$  and  $D_v$  are partly compensating, such that  
 122 their product varies by less than 3% between 20 and  $30^\circ C$ . Neglecting convection, with  $c$   
 123 and  $D_v$  as constant about  $T_o$ , and with the linearization in (29), we can now write the flux  
 124 of water vapor through the leaf thickness in terms of the potential and temperature of the  
 125 liquid phase with which it is in local equilibrium as,

$$J_v = -cD_v \left( \chi_\psi \frac{\partial\psi}{\partial z} + \chi_T \frac{\partial T}{\partial z} \right). \quad (35)$$

126 The flux of liquid water  $J_l$  through the cells can be written in a form analogous to  
 127 Darcy's law, with  $k_l$  the combined hydraulic conductivity of the cell wall and symplast  
 128 (Molz & Ferrier 1982; Rockwell et al. 2014). Here we are neglecting temperature effects on  
 129 liquid phase transport that might arise due to viscosity, fluid density, and osmotic potentials,  
 130 as these are negligible for the expected variations in temperature within a leaf of less than  
 131  $1^\circ C$ . The conductive heat flux in both phases follows Fourier's law, with  $k^T$  the thermal  
 132 conductivity of the respective phase,

$$J_l = -k_l \frac{\partial\psi}{\partial z}, \quad (36)$$

$$q_l = -k_l^T \frac{\partial T}{\partial z}, \quad q_v = -k_v^T \frac{\partial T}{\partial z}. \quad (37)$$

133 Inserting these expressions for the fluxes into (12), and with  $z$  aligned through the thickness  
 134 of the leaf, energy conservation in the composite of air and cells has the form,

$$0 = (\mathcal{A}_l k_l^T + \mathcal{A}_v k_v^T) \frac{\partial^2 T}{\partial z^2} - \mathcal{A}_l \bar{\lambda} k_l \frac{\partial^2 \psi}{\partial z^2} + \mathcal{A}_l \bar{v} k_l \left( \frac{\partial\psi}{\partial z} \right)^2 \quad (38)$$

$$+ \left[ \mathcal{A}_l c_{p,l} k_l \frac{\partial\psi}{\partial z} + \mathcal{A}_v c_{p,v} c D_v \left( \chi_\psi \frac{\partial\psi}{\partial z} + \chi_T \frac{\partial T}{\partial z} \right) \right] \frac{\partial T}{\partial z} + \dot{Q}.$$

### 135 Non-dimensionalization

136 In order to organize our thinking about the relative importance of the various terms in (38),  
 137 it is helpful to re-scale the derivatives to order 1. To do so, we express temperature and

138 potential in reference to their values at the course boundary for water and their characteristic  
 139 gradients. The precise form of the latter is unknown at this stage, but will be defined by the  
 140 problem. For a tissue of length  $L$  in the  $z$  direction, the new variables are,

$$Z = \frac{z}{L}, \quad \Theta = \frac{T - T_o}{\Delta T_c}, \quad \Psi = \frac{\psi - \psi_o}{\Delta \psi_c}. \quad (39)$$

141 Inserting the change of variables into (38) and re-arranging, we find

$$0 = \frac{\mathcal{A}_l k_l^T + \mathcal{A}_v k_v^T}{\mathcal{A}_l \bar{\lambda} k_l} \frac{\Delta T_c}{\Delta \psi_c} \frac{\partial^2 \Theta}{\partial Z^2} - \frac{\partial^2 \Psi}{\partial Z^2} + \left( \frac{c_l^T \Delta T_c}{\bar{\lambda}} + \frac{\mathcal{A}_v c_v^T c D_v \chi_\psi \Delta T_c}{\mathcal{A}_l \bar{\lambda} k_l} \right) \frac{\partial \Psi}{\partial Z} \frac{\partial \Theta}{\partial Z} \quad (40)$$

$$+ \frac{\mathcal{A}_v c_v^T c D_v \chi_T}{\mathcal{A}_l \bar{\lambda} k_l} \frac{\Delta T_c^2}{\Delta \psi_c} \left( \frac{\partial \Theta}{\partial Z} \right)^2 + \frac{\bar{v} \Delta \psi_c}{\bar{\lambda}} \left( \frac{\partial \Psi}{\partial Z} \right)^2 + \frac{\dot{Q} L^2}{\mathcal{A}_l \bar{\lambda} k_l \Delta \psi_c}.$$

142 By construction, the derivatives are all order one, scaled by non-dimensional groupings of  
 143 parameters. Both the mixed and squared derivative terms, which arise from convection of  
 144 enthalpy with the molecular flux, are multiplied by the ratio of heat capacity (vapor or liquid)  
 145 or the characteristic chemical potential difference  $\bar{v} \Delta \psi_c$  to the heat of vaporization: the first  
 146 is a very small quantity ( $< 0.002$ ), and the second is likely to be small for physiologically  
 147 relevant range of  $\psi$ . At his juncture, we will assume we can neglect these terms; once the  
 148 forms of the characteristic gradients are known, the convective terms and this assumption  
 149 can be evaluated.

150 Turning to the conservation of molecules, with the above change of variables (11) becomes,

$$\frac{\mathcal{A}_l k_l \Delta \psi_c}{L^2} \frac{\partial^2 \Psi}{\partial Z^2} = - \frac{\mathcal{A}_v c D_v \chi_\psi \Delta \psi_c}{L^2} \frac{\partial^2 \Psi}{\partial Z^2} - \frac{\mathcal{A}_v c D_v \chi_T \Delta T_c}{L^2} \frac{\partial^2 \Theta}{\partial Z^2}. \quad (41)$$

151 Re-arrangement leads directly to an expression relating the divergences of the gradients in  
 152  $\Theta$  and  $\Psi$ ,

$$- \left( \frac{\mathcal{A}_l k_l + \mathcal{A}_v c D_v \chi_\psi}{\mathcal{A}_v c D_v \chi_T} \right) \frac{\partial^2 \Psi}{\partial Z^2} = \frac{\Delta T_c}{\Delta \psi_c} \frac{\partial^2 \Theta}{\partial Z^2}. \quad (42)$$

153 The left hand side of (42) can be substituted into (40), which with the neglect of the con-  
 154 vective terms leads to,

$$0 = - \left( 1 + \frac{\mathcal{A}_l k_l^T + \mathcal{A}_v k_v^T}{\mathcal{A}_v \bar{\lambda} c D_v \chi_T} + \frac{\mathcal{A}_l k_l^T + \mathcal{A}_v k_v^T}{\mathcal{A}_l \bar{\lambda} k_l} \frac{\chi_\psi}{\chi_T} \right) \frac{\partial^2 \Psi}{\partial Z^2} + \frac{\dot{Q} L^2}{\mathcal{A}_l \bar{\lambda} k_l \Delta \psi_c}. \quad (43)$$

155 This equation governs the steady state potential field. In the absence of any energy loading,  
 156 (43) simplifies to linear function. To the extent that the thermal load ( $\dot{Q}L$ ) is consumed by  
 157 local evaporation of a liquid flux ( $\mathcal{A}_l \bar{\lambda} k_l \Delta \psi_c / L$ ), their ratio on the RHS of (43) will approach  
 158 one. The parenthetical non-dimensional groups tell us how any energy that is loaded will  
 159 tend to move. As the whole equation must balance, and the derivative term is order one, for  
 160 local evaporation to consume the whole thermal load requires that the parenthetical term  
 161 evaluate to one. This in turn requires that the combined heat transport due to conduction  
 162 in both phases must be negligible relative to the transport of latent heat due to temperature  
 163 driven gradients in vapor concentration, as well as relative to the potential latent heat in



164 liquid transport, scaled by the ratio of the sensitivity of vapor concentrations to changes in  
 165 potential and temperature (the latter  $\sim 0.1$ ).

166 We can also find an equation for the temperature field by again combining (42) and (40),  
 167 while normalizing energy loading by the characteristic conductive flux,

$$0 = \left( 1 + \frac{\mathcal{A}_l \bar{\lambda} k_l}{\mathcal{A}_l k_l^T + \mathcal{A}_v k_v^T} \frac{\chi_T}{\chi_\psi} \frac{\mathcal{A}_v c D_v \chi_\psi}{\mathcal{A}_l k_l + \mathcal{A}_v c D_v \chi_\psi} \right) \frac{\partial^2 \Theta}{\partial Z^2} + \frac{\dot{Q} L^2}{(\mathcal{A}_l k_l^T + \mathcal{A}_v k_v^T) \Delta T_c}. \quad (44)$$

168 The analysis is similar, in that the derivative is  $O(1)$  by construction, and the larger the  
 169 parenthetical term, the smaller the proportion of loaded energy removed by conduction. For  
 170 convenience, we label the parenthetical terms scaling the derivatives in (43) and (44)  $\Pi_\psi$  and  
 171  $\Pi_T$ ,

$$\Pi_\psi \equiv 1 + \frac{\mathcal{A}_l k_l^T + \mathcal{A}_v k_v^T}{\mathcal{A}_v \bar{\lambda} c D_v \chi_T} + \frac{\mathcal{A}_l k_l^T + \mathcal{A}_v k_v^T}{\mathcal{A}_l \bar{\lambda} k_l} \frac{\chi_\psi}{\chi_T} \quad (45)$$

$$\Pi_T \equiv 1 + \frac{\mathcal{A}_l \bar{\lambda} k_l}{\mathcal{A}_l k_l^T + \mathcal{A}_v k_v^T} \frac{\chi_T}{\chi_\psi} \frac{\mathcal{A}_v c D_v \chi_\psi}{\mathcal{A}_l k_l + \mathcal{A}_v c D_v \chi_\psi}. \quad (46)$$

172  $\Pi_T$  offers a different view of the behavior of the system than  $\Pi_\psi$ , but contains no new  
 173 information on the relative importance of conduction versus evaporation. As  $\Pi_\psi$  and  $\Pi_T$   
 174 balance the proportions of conductive and evaporative dissipation of a thermal load, with  
 175 the neglect of internal heat transfer by convection and radiation, their inverses must sum to  
 176 one,

$$\Pi_\psi^{-1} + \Pi_T^{-1} = 1, \quad (47)$$

177 which may be readily confirmed with the aid of a computer (the algebra is tedious). We can  
 178 now complete the analysis of the governing equations by defining the characteristic gradients  
 179 in order to satisfy our claim that the derivative terms are order one;

$$\Delta T_c = \frac{\dot{Q} L^2}{\Pi_T (\mathcal{A}_l k_l^T + \mathcal{A}_v k_v^T)}, \quad \Delta \psi_c = \frac{\dot{Q} L^2}{\Pi_\psi \mathcal{A}_l \bar{\lambda} k_l}. \quad (48)$$

180 These quantities can then be used to check whether the neglect of convection from (40) on  
 181 is justified, given the magnitude of a typical thermal load  $\dot{Q}$ . With these choices of the  
 182 characteristic gradients, the governing equations become,

$$0 = -\frac{\partial^2 \Psi}{\partial Z^2} + 1. \quad (49)$$

$$0 = \frac{\partial^2 \Theta}{\partial Z^2} + 1. \quad (50)$$

183 The above forms will be convenient for solving, but all of the information on the relative  
 184 importance of conduction and local evaporation for dissipating a thermal load is now con-  
 185 tained in (48). While these two non-dimensional groups describe the inherent properties of a  
 186 composite formed of liquid and vapor phases, the behavior of the solution in any real system  
 187 will depend on the conditions that exist on its boundaries as well.

188 **Boundary conditions and solution for a non-transpiring leaf surface**

189 We first consider a 1D domain of leaf tissue bounded on one side by the vascular plane, and  
 190 on the other by a non-transpiring epidermis (e.g., the upper epidermis of an hypostomatous  
 191 leaf). We fix the origin at the vascular plane, and let  $L$  be the distance to the epidermal  
 192 surface. As there is no flux of water from this surface, steady state molecular conservation,  
 193 the flux of vapor and liquid from the interior sums to zero at the surface,

$$(\mathcal{A}_l J_l + \mathcal{A}_v J_v)|_{z=L} = 0, \quad (51)$$

$$-\mathcal{A}_l k_l \frac{\partial \psi}{\partial z}|_{z=L} - \mathcal{A}_v c D_v \left( \chi_\psi \frac{\partial \psi}{\partial z}|_{z=L} + \chi_T \frac{\partial T}{\partial z}|_{z=L} \right) = 0. \quad (52)$$

194 For the thermal energy balance, conduction from the interior plus the enthalpy of the vapor  
 195 and liquid fluxes must be balanced by conduction of sensible heat to the surrounding air and  
 196 the net long wave radiation flux,

$$(\mathcal{A}_l q_l + \mathcal{A}_v q_v + \mathcal{A}_l J_l \bar{H}_l + \mathcal{A}_v J_v \bar{H}_v)|_{z=L} = (q_c + q_r)|_{z=L}. \quad (53)$$

197 Here we are neglecting cuticular transpiration, as well as the possibility that the epidermal  
 198 leaf temperature could fall below the dew point, leading to condensation of external water  
 199 vapor on the leaf surface. The latter could be accounted for by adding enthalpy transport  
 200 terms to the RHS, and an additional molecular conservation statement summing external  
 201 liquid and vapor fluxes to zero. However, as condensation on the outer surface falls outside  
 202 the typical regime of transpiring conditions that is our principal interest, it will not be  
 203 explored further. Making use of the requirement from molecular conservation that at the  
 204 surface  $\mathcal{A}_l J_l = -\mathcal{A}_v J_v$  leads again to a latent heat term,

$$(\mathcal{A}_l q_l + \mathcal{A}_v q_v + \mathcal{A}_l J_l (\bar{H}_l - \bar{H}_v))|_{z=L} = (q_c + q_r)|_{z=L}, \quad (54)$$

$$(\mathcal{A}_l q_l + \mathcal{A}_v q_v - \mathcal{A}_l J_l \bar{\lambda})|_{z=L} = (q_c + q_r)|_{z=L}, \quad \bar{\lambda} = \bar{H}_v - \bar{H}_l. \quad (55)$$

205 Here the latent heat term accounts for the energy involved in a liquid flux evaporating on  
 206 the internal boundary of the surface and diffusing back toward the center of the leaf, or a  
 207 vapor flux condensing on the internal surface and flowing backward as liquid.

208 For the moment, we will avoid writing the outward sensible and radiative fluxes in terms  
 209 of their dependence on leaf temperature at the surface, as the radiative term is proportional  
 210 to temperature to the fourth power, a non-linearity that prohibits finding a simple closed form  
 211 solution. That is, we will first find and analyze the structure of the solution to the general  
 212 problem with the external fluxes regarded as known, and later add-in explicit representations  
 213 of the external fluxes to assemble a system of simultaneous equations that can be solved  
 214 numerically.

215 For the boundary conditions at the vascular plane, we simply label the potential and  
 216 temperature that exist there. These quantities will link together the solutions for the upper  
 217 and lower domains of our leaf, and indeed have already been identified as properties of the

218 ‘source region’ in our analyses of the governing equations for the temperature and potential  
 219 fields; the particular values will be solved for later. The boundary conditions are then,

$$\psi(z = 0) = \psi_o, \quad T(z = 0) = T_o. \quad (56)$$

220 While this completes the specification of the boundary conditions, they are not yet in a useful  
 221 form for solving (49, 50); we need expressions that prescribe the values of the gradients in  $\psi$   
 222 and  $T$  at the surface. Adopting the same change of variables as before (39) and substituting  
 223 in the expressions for the individual fluxes (36, 37, 35), molecular conservation at the surface  
 224 (52) leads to,

$$\frac{\partial \Theta}{\partial Z} \Big|_{Z=1} = - \frac{(\mathcal{A}_l k_l + \mathcal{A}_v c D_v \chi_\psi)}{\mathcal{A}_v c D_v \chi_T} \frac{\Delta \psi}{\Delta T} \frac{\partial \Psi}{\partial Z} \Big|_{Z=1}. \quad (57)$$

225 Whereas in the body molecular conservation lead to a relationship between the divergences  
 226 of the temperature and potential field (42), at the boundary the gradients are related by the  
 227 requirement that if a gradient in potential drives a flow to the boundary, the temperature  
 228 gradient has to be large enough to drive an equivalent molar flux as vapor away from the  
 229 boundary. Note that  $\Delta \psi$  and  $\Delta T$  are defined as before, by (39) and (48). Turning to thermal  
 230 energy conservation (55), the change of variables leads to,

$$\frac{\partial \Psi}{\partial Z} \Big|_{Z=1} = \frac{L(q_c + q_r)}{\bar{\lambda} \mathcal{A}_l k_l} + \frac{(\mathcal{A}_l k_l^T + \mathcal{A}_v k_v^T)}{\bar{\lambda} \mathcal{A}_l k_l} \frac{\Delta T}{\Delta \psi} \frac{\partial \Theta}{\partial Z} \Big|_{Z=1}. \quad (58)$$

231 Combining (57) and (58) so as to eliminate either the  $\Theta$  or  $\Psi$  derivative yields the sought  
 232 for boundary conditions, which simplify to just the ratio of the surface heat fluxes to the  
 233 absorbed load. The complete boundary conditions for solving (49) and (50) are given by,

$$\frac{\partial \Psi}{\partial Z} \Big|_{Z=1} = \frac{(q_c + q_r)}{\dot{Q}L}, \quad \Psi(Z = 0) = 0, \quad (59)$$

$$\frac{\partial \Theta}{\partial Z} \Big|_{Z=1} = - \frac{(q_c + q_r)}{\dot{Q}L}, \quad \Theta(Z = 0) = 0. \quad (60)$$

234 The solution follows easily from two integrations and application of the boundary conditions:

$$\Psi(Z) = \frac{Z^2}{2} + \left[ \frac{(q_c + q_r)}{\dot{Q}L} - 1 \right] Z, \quad (61)$$

$$\Theta(Z) = - \frac{Z^2}{2} - \left[ \frac{(q_c + q_r)}{\dot{Q}L} - 1 \right] Z. \quad (62)$$

235 Returning to the original variables results in,

$$\psi(z) = \psi_o + \frac{\dot{Q}L^2}{\Pi_\psi \bar{\lambda} \mathcal{A}_l k_l} \left[ \frac{z^2}{2L^2} - \frac{z}{L} \right] + \frac{L(q_c + q_r)}{\Pi_\psi \bar{\lambda} \mathcal{A}_l k_l} \frac{z}{L}, \quad (63)$$

$$T(z) = T_o - \frac{\dot{Q}L^2}{\Pi_T (\mathcal{A}_l k_l^T + \mathcal{A}_v k_v^T)} \left[ \frac{z^2}{2L^2} - \frac{z}{L} \right] - \frac{L(q_c + q_r)}{\Pi_T (\mathcal{A}_l k_l^T + \mathcal{A}_v k_v^T)} \frac{z}{L}. \quad (64)$$

236 In the above solutions, area fractions, surface fluxes, and the solar radiation load are quan-  
 237 tities specific to the particular domain of interest.

238 **Boundary conditions and solution for a transpiring leaf surface**

239 In the presence of a transpirational flux of water vapor  $E$  from the leaf surface to the  
 240 surrounding air, molecular and thermal energy conservation at the surface become,

$$(\mathcal{A}_l J_l + \mathcal{A}_v J_v)|_{z=L} = E|_{z=L}, \quad (65)$$

$$(\mathcal{A}_l q_l + \mathcal{A}_v q_v + \mathcal{A}_l J_l \bar{H}_l + \mathcal{A}_v J_v \bar{H}_v)|_{z=L} = (E \bar{H}_v + q_c + q_r)|_{z=L}. \quad (66)$$

241 Substituting (65) into (66) again leads to a latent heat term; after accounting for molecular  
 242 conservation the energy conservation statement has the same form as the non-transpiring  
 243 surface case (55),

$$(\mathcal{A}_l q_l + \mathcal{A}_v q_v - \mathcal{A}_l J_l \bar{\lambda})|_{z=L} = (q_c + q_r)|_{z=L}. \quad (67)$$

244 After the change of variables and insertion of the expressions for the individual fluxes as  
 245 above, substitution and re-arrangement of (65) and (67) again yield the necessary conditions  
 246 on the gradients in  $\Psi$  and  $\Theta$  at the surface, while the boundary conditions at the vascular  
 247 plane are unchanged from the previous case, leading to,

$$\frac{\partial \Psi}{\partial Z}|_{Z=1} = \frac{(q_c + q_r)}{\dot{Q}L} - \frac{\bar{\lambda}E}{\dot{Q}L} \frac{(\mathcal{A}_l k_l^T + \mathcal{A}_v k_v^T)}{\bar{\lambda} \mathcal{A}_v c D_v \chi_T}, \quad \Psi(Z=0) = 0, \quad (68)$$

$$\frac{\partial \Theta}{\partial Z}|_{Z=1} = -\frac{(q_c + q_r)}{\dot{Q}L} - \frac{\bar{\lambda}E}{\dot{Q}L} \frac{\mathcal{A}_l k_l}{(\mathcal{A}_l k_l + \mathcal{A}_v c D_v \chi_\psi)}, \quad \Theta(Z=0) = 0. \quad (69)$$

248 Solving the non dimensional potential and temperature fields (49) and (50) subject to (68)  
 249 and (69) respectively results in,

$$\Psi(Z) = \frac{Z^2}{2} + \left[ \frac{(q_c + q_r)}{\dot{Q}L} - 1 - \frac{\bar{\lambda}E}{\dot{Q}L} \frac{(\mathcal{A}_l k_l^T + \mathcal{A}_v k_v^T)}{\bar{\lambda} \mathcal{A}_v c D_v \chi_T} \right] Z, \quad (70)$$

$$\Theta(Z) = -\frac{Z^2}{2} - \left[ \frac{(q_c + q_r)}{\dot{Q}L} - 1 + \frac{\bar{\lambda}E}{\dot{Q}L} \frac{\mathcal{A}_l k_l}{(\mathcal{A}_l k_l + \mathcal{A}_v c D_v \chi_\psi)} \right] Z. \quad (71)$$

250 Returning to dimensional variables, the solutions for the temperature and potential fields in  
 251 a domain between the vascular plane and transpiring epidermis are,

$$\psi(z) = \psi_o + \frac{\dot{Q}L^2}{\Pi_\psi \bar{\lambda} \mathcal{A}_l k_l} \left[ \frac{z^2}{2L^2} - \frac{z}{L} \right] + \left[ \frac{L(q_c + q_r)}{\Pi_\psi \bar{\lambda} \mathcal{A}_l k_l} - \frac{LE}{\Pi_\psi \bar{\lambda} \mathcal{A}_l k_l} \frac{(\mathcal{A}_l k_l^T + \mathcal{A}_v k_v^T)}{\mathcal{A}_v c D_v \chi_T} \right] \frac{z}{L}, \quad (72)$$

$$T(z) = T_o - \frac{\dot{Q}L^2}{\Pi_T (\mathcal{A}_l k_l^T + \mathcal{A}_v k_v^T)} \left[ \frac{z^2}{2L^2} - \frac{z}{L} \right] - \left[ \frac{L(q_c + q_r)}{\Pi_T (\mathcal{A}_l k_l^T + \mathcal{A}_v k_v^T)} + \frac{L\bar{\lambda}E}{\Pi_T (\mathcal{A}_l k_l^T + \mathcal{A}_v k_v^T)} \frac{\mathcal{A}_l k_l}{(\mathcal{A}_l k_l + \mathcal{A}_v c D_v \chi_\psi)} \right] \frac{z}{L}. \quad (73)$$

252 **Appendix A: Neglect of the radiative flux through the**  
 253 **pore space**

254 The radiative flux across the air spaces in the leaf can be written

$$q_r^{oe} = \sigma_{sb} F(T_o^2 + T_e^2)(T_o + T_e)(T_o - T_e) \quad (74)$$

255 For any given temperature difference  $T_o - T_e$  over a length  $L$ , the quantity  $\sigma_{sb} F(T_o^2 + T_e^2)(T_o +$   
 256  $T_e)$  represents an effective conductance due to radiative transfer that may be compared in  
 257 magnitude to the conductance due to thermal conduction in the airspace  $k_v^T/L$ . At 25C, for  
 258 distances as large as on the order of 100 microns, the above comparison shows that conduction  
 259 in the airspace is still 43 times that of radiative transfer. Given that clear views between  
 260 cells will be less than 100 microns in internal airspaces, and that liquid phase conduction  
 261 exceeds that of the airspace by an order of magnitude, it appears safe to neglect radiative  
 262 transfer within a leaf.

263 **Appendix B: effective boundary layer thickness from**  
 264 **licor**

265 The Licor 6400 gives the boundary layer conductance  $g_{bw}$  in  $\text{mol m}^{-2} \text{s}^{-1}$ , which for the  
 266 oak data is 1.42 (August 8 2009). The conductance is defined by the equation relating the  
 267 molecular flux to the difference in mole fraction  $\Delta\chi$  between the leaf surface and the free air  
 268 stream an effective distance  $\Delta z = \delta$  from the surface, or

$$J_v = g_{bw} \Delta\chi = -g_{bw} \delta \frac{\partial\chi}{\partial z} = -cD_v \frac{\partial\chi}{\partial z} \quad (75)$$

269 The last equality defines  $\delta$ , the effective boundary layer thickness for diffusion and conduc-  
 270 tion, as

$$\delta = \frac{cD_v}{g_{bw}}. \quad (76)$$

271 **Appendix C: Analysis of stomatal responses to increased**  
 272 **energy loads**

273 For the sake of simplicity, we consider a leaf as a single domain subject to a short wave load  
 274  $SR$ , with a single transpiring surface. Global energy conservation then takes the form,

$$\delta SR = \delta(\bar{\lambda}E) + \delta(q_r + q_c) \quad (77)$$

With  $\Delta\chi$  the leaf to air water vapor mole fraction difference, with ambient air and surround-  
 ing temperature  $T_a$  constant, expanding the terms on the RHS leads to,

$$\bar{\lambda}\delta E = \bar{\lambda}(\delta g_T \cdot \Delta\chi + g_T \cdot \delta\Delta\chi), \quad (78)$$

$$\delta(q_r + q_c) = K_s^T(\delta T_e) \quad K_s^T \equiv \frac{k_v^T}{\delta} + K_r = \frac{q_r + q_c}{\Delta T_{ea}}, \quad (79)$$

275 where  $K_s^T$  is the effective total sensible heat conductance from leaf to air, as defined by the  
 276 sensible flux from the leaf divided by the leaf to air temperature difference  $\Delta T_{ea}$ . Combining  
 277 the above three equations, re-arranging, and using  $\delta\chi = \chi_T \delta T_e$  and results in an expression  
 278 for the proportional change in  $g_T$ ,

$$\frac{\delta g_T}{g_T} = \frac{\delta SR}{\bar{\lambda}E} - \left( \frac{K_s^T}{\bar{\lambda}E} + \frac{\chi_T}{\Delta\chi} \right) \delta T_e. \quad (80)$$

279 To find  $\delta T_e$ , we next consider the changes in internal transport. By the assumption that  
 280 stomatal aperture changes to hold a fixed epidermal potential,  $\psi_e$  is fixed, and neglecting  
 281 the secondary effects of variation in the vascular potential drop due to a change in the flux,  
 282 we regard the liquid flux in the leaf as well as the vapor flux due to the potential gradient  
 283 as constant. With the further approximation that the internal latent and sensible fluxes  
 284 are linear in the vascular plane to epidermal surface potential and temperature drops (i.e.,  
 285 neglecting the effects of evaporation in the spongy mesophyll), an internal energy balance  
 286 leads to,

$$\delta SR = (\bar{\lambda}\mathcal{A}_v c D_v \chi_T + \mathcal{A}_v k_v^T + \mathcal{A}_l k_l^T) \frac{\delta \Delta T_{oe}}{L}. \quad (81)$$

287 Further, as the vascular to epidermal potential gradient is (approximately) conserved by the  
 288 stomata, considering molecular conservation together with energy conservation allows shows  
 289 that the responses of the internal and external latent and sensible fluxes balance separately,

$$\bar{\lambda}\delta E = \bar{\lambda}\mathcal{A}_v c D_v \chi_T \frac{\delta \Delta T_{oe}}{L}, \quad (82)$$

$$\delta(q_r + q_c) = (\mathcal{A}_v k_v^T + \mathcal{A}_l k_l^T) \frac{\delta \Delta T_{oe}}{L}. \quad (83)$$

290 Combining (79) with (83) to relate the internal and external sensible fluxes, and then using  
 291 the result to eliminate the change on the vascular to epidermal temperature drop  $\delta \Delta T_{oe}$  from  
 292 (81), leads to an expression for the change in epidermal temperature  $\delta T_e$ , as

$$\delta T_e = \frac{\mathcal{A}_v k_v^T + \mathcal{A}_l k_l^T}{K_s^T} \left( \frac{\delta SR}{(\bar{\lambda}\mathcal{A}_v c D_v \chi_T + \mathcal{A}_v k_v^T + \mathcal{A}_l k_l^T)} \right). \quad (84)$$

293 With the epidermal temperature response do defined, the stomatal response (80) can be  
 294 written,

$$\frac{\delta g_T}{g_T} = \frac{\delta SR}{\bar{\lambda}E} \left[ 1 - \frac{1}{1 + \frac{\bar{\lambda}\mathcal{A}_v c D_v \chi_T}{\mathcal{A}_v k_v^T + \mathcal{A}_l k_l^T}} \left( 1 + \frac{\bar{\lambda}g_T \chi_T}{K_s^T} \right) \right]. \quad (85)$$

## References

- 295
- 296 Bird R.B., Stewart W.E. & Lightfoot E.N. (1960) *Transport Phenomena*. John Wiley &  
297 Sons, New York, NY.
- 298 Kittel C. & Kroemer H. (1980) *Thermal Physics*. Freeman, New York, NY, USA.
- 299 Lemmon E., McLinden M. & Friend D. (2013) Thermophysical properties of fluid systems. In  
300 P. Linstrom & W. Mallard, eds., *NIST Standard Reference Database Number 69*, National  
301 Institute of Standards and Technology, Gaithersburg, MD.
- 302 Molz F. & Ferrier J. (1982) Mathematical treatment of water movement in plant cells and  
303 tissue: a review. *Plant Cell Environ* **5**, 191–206.
- 304 Pickard W.F. (1981) The ascent of sap in plants. *Progress in Biophysics and molecular*  
305 *Biology* **37**, 181–229.
- 306 Rockwell F.E., Holbrook N.M. & Strock A. (2014) Leaf hydraulics I: Scaling transport  
307 properties from single cells to tissues. *Journal of Theoretical Biology* **340**, 251–266.
- 308 Wheeler T.D. & Strock A.D. (2009) Stability limit of liquid water in metastable equilibrium  
309 with subsaturated vapors. *Langmuir* **25**, 7609–7622.
- 310 Yianoulis P. & Tyree M.T. (1984) A model to investigate the effect of evaporative cooling  
311 on the pattern of evaporation in sub-stomatal cavities. *Annals of Botany* **53**, 189–206.
