# Supplementary material
Source: PubMed Central journal article supplement (PMC3982738)
Supplement: supp_pp.114.236323_236323Supplemental_Text_S3.pdf [file supp_pp.114.236323_236323Supplemental_Text_S3.pdf]

```
In[361]= Remove["Global`*"]
```

## Cuvette Solution for Red oak

### Parameter values

#### Fluxes and parameters from data oak

```
In[362]= Tran = 0.0056; (*.0056 oak moles m-2 s-1*)
```

```
In[363]=  $\theta_o = 273.15 + 28.83$  (*kelvin licor leaf temp*)  

 $\theta_{air} = 273.15 + 28.31$  (*licor air temp*)
```

```
Out[363]= 301.98
```

```
Out[364]= 301.46
```

```
In[365]=  $\theta_{blk} =$   

 $273.15 + 28.125$  (*licor blk temp 28.125, this temp for radiation in chamber *)
```

```
Out[365]= 301.275
```

#### Physical quantities at 28 C, -1 MPa

```
In[366]= Patm = 1.013 * 10^5; (*atm pressure in Pa*)
```

```
In[367]=  $\lambda = 43837$ ; (* Joules per Mol*)
```

```
In[368]= R = 8.3145; (*gas constant Joules per mole per Kelvin*)
```

```
In[369]=  $D_v = \frac{Patm}{R \theta_{var}} 2.13 * \left( \frac{\theta_{var}}{273.15} \right)^{1.8} *$   

 $10^{-5}$  (* cDv for mol frac drving force out of leaf *)
```

```
Out[369]= 0.0000106815  $\theta_{var}^{0.8}$ 
```

```
In[370]=  $k_{vh} = .026$ ; (* heat cond air J m-2 s-1 K-1, nobel .0255 20C, .0264 40C*)
```

```
In[371]=  $P_o = 1.28 R 298.15 * 10^{-6}$  (* ref vapor pressure MPA *)
```

```
Out[371]= 0.00317308
```

```
In[372]= Pa = Patm * 10^-6 (* atm pressure in MPa*)
```

```
Out[372]= 0.1013
```

```
In[373]=  $c[\psi_, \theta_] := 1.28 \frac{R 298.15}{Patm} \text{Exp}\left[-\frac{44000}{R} \left(\frac{1}{\theta} - \frac{1}{298.15}\right)\right]$   

 $\text{Exp}\left[\frac{(\psi + Pa - P_o) 18.07}{R \theta}\right]$  (*mol fraction for psi in MPa*)
```

```
In[374]=  $\theta_{var} = 302.06$  (*update with theta o *)
```

```
Out[374]= 302.06
```

```
In[375]=  $\psi_{var} = -1.688$  (* update with psi o *)
```

```
Out[375]= -1.688
```

```
In[376]=  $C_{v\theta} = \partial_{\theta} c[\psi_{var}, \theta]$  /.  $\theta \rightarrow \theta_{var}$  (* linearization of dx/dT 1/k *)  

 $C_{\psi\psi} = \partial_{\psi} c[\psi, \theta_{var}]$  /.  $\psi \rightarrow \psi_{var}$  (* linearization of dx/dpsi 1/mpa *)
```

```
Out[376]= 0.00226151
```

```
Out[377]= 0.000280359
```

```
In[378]=  $\sigma = 5.670373 * 10^{-8}$ ; (*stefan boltzmann J/m2/s/kelvin-4 *)
```

```
In[379]= F = 0.95; (*emissivity radiative from leaf*)
```

### Leaf parameters

```
In[380]=  $A_1 = .7$ ; (* .1263 oakair fraction, say 0.5 just mesophyll*)  

 $A_v = 1 - A_1$ ; (*Area fraction tissue in leaf from 2011 data 12.63%*)
```

```
In[382]=  $AU_1 = .95$ ; (* .1263 oakair fraction, say 0.5 just mesophyll*)  

 $AU_v = 1 - AU_1$ ; (*Area fraction tissue in leaf from 2011 data 12.63%*)
```

```
In[384]=  $L = .72 * 131 * 10^{-6}$  (*-20 10^-6*)
```

```
Out[384]= 0.00009432
```

```
In[385]=  $LU = 1.28 * 131 * 10^{-6}$ 
```

```
Out[385]= 0.00016768
```

```
In[386]=  $k_{lh} = .28614$ ; (* heat cond liq phase, based on .25 for whole leaf vogel *)
```

```
In[387]=  $k_{total} = 6.45 * 10^{-7}$ ; (* hyd cond leaf mol/m/s/mpa  

1D scaled fit with hA specified scaled k est on tree*)
```

```
In[388]=  $k_1 = (k_{total} - .1263 D_v C_{\psi\psi}) / (1 - .1263)$  (* hyd cond tissue *)
```

```
Out[388]=  $6.96509 * 10^{-7}$ 
```

```
In[389]= H = 0.021 (*mol/m2/s/MPa *)
```

```
Out[389]= 0.021
```

```
In[390]= HA =  

(0.021) * 0.67 (*mol/m2/s/MPa plus steady state 1D scale factor based on Biotout*)
```

```
Out[390]= 0.01407
```

```
In[391]=  $\psi_o = -1.29 - Tran / HA$  (* stem potential from cov'  

d leaf in mpa: psio is 'effective potential' at mid vein *)
```

```
Out[391]= -1.68801
```

## Check whole leaf air fraction

```
In[392]:= 
$$\frac{L A_v + L U A U_v}{L + L U}$$

Out[392]= 0.14
```

## Description of fluxes and relations to env parameters

```
In[393]:=  $P\theta_u = 302.114$  (* start with theta e, update with theta u *)
Out[393]= 302.114

In[394]:=  $U h_r = \sigma F (P\theta_u^2 + \theta_{blk}^2) (P\theta_u + \theta_{blk})$ ; (* radiative HTC FOR
CHAMBER MEASUREMENTS! For clear sky replace theta blk with sky*)

In[395]:=  $h_r = \sigma F (\theta_e^2 + \theta_{blk}^2) (\theta_e + \theta_{blk})$ ; (* radiative HTC FOR CHAMBER
MEASUREMENTS! For clear sky replace theta blk with sky*)

In[396]:=  $\delta = 7.27 * 10^{-4}$ ; (* in m: cuvette leaf boundary layer*)

In[397]:= (*delta is from licor 1.42 mol/m2/s g_bw, d=Dv*C_a/g_bw, C_a=40.49 mol/m3*)

In[398]:=  $\frac{k_{vh}}{\delta}$  (* Licor calc is 39.79 for this parameter, based on Cpvgbl, or 28*1.42 *)
Out[398]= 35.7634

In[399]:=  $q_{s1} = \frac{k_{vh}}{\delta} (\theta_e - \theta_{air})$ 
Out[399]= 18.597

In[400]:=  $q_{su} = \frac{k_{vh}}{\delta} (P\theta_u - \theta_{air})$ 
(* ITERATIVE CORR approximate as using lower leaf temp so check error *)
Out[400]= 23.3893

In[401]:=  $q_{r1} = h_r (\theta_e - \theta_{blk})$ 
Out[401]= 4.16867

In[402]:=  $q_{ru} = U h_r (P\theta_u - \theta_{blk})$ 
(* ITERATIVE CORR approximate as using lower leaf temp so check error *)
Out[402]= 4.96432

In[403]:=  $q_{Total} = q_{su} + q_{s1} + q_{r1} + q_{ru} + \lambda Tran$ 
Out[403]= 296.606

In[404]:=  $\lambda Tran$ 
Out[404]= 245.487
```

```
In[405]:=  $Q = 0.2 * q_{Total} / L$  (* w m-3 volumetric heat source,
.2 is fraction of total abs solar rad abs in spongy *)
Out[405]= 628.936

In[406]:=  $QU = 0.8 * q_{Total} / LU$ 
Out[406]=  $1.41511 \times 10^6$ 

In[407]:=  $QL$  (* total solar in lower half of leaf*)
Out[407]= 59.3213

In[408]:=  $QU LU$ 
Out[408]= 237.285

In[409]:=  $QL + QU LU$ 
Out[409]= 296.606

In[410]=
```

## Solution lower potential field

```
In[411]:=  $\Pi_\psi = 1 + \frac{A_1 k_{1h} + A_v k_{vh}}{\lambda A_v D_v C_{v\theta}} + \frac{A_1 k_{1h} + A_v k_{vh}}{\lambda A_1 k_1} \frac{C_{v\psi}}{C_{v\theta}}$ 
Out[411]= 9.00223

In[412]:=  $\alpha = \left( \frac{(q_{s1} + q_{r1}) L}{Q L^2} - \frac{Tran L}{Q L^2} \frac{A_1 k_{1h} + A_v k_{vh}}{A_v D_v C_{v\theta}} \right)$ 
Out[412]= -27.7366

In[413]:=  $\Psi[X_] := \frac{X^2}{2} - X + \alpha X$ 

In[414]:= Plot[Ψ[X], {X, 0, 1}]
```

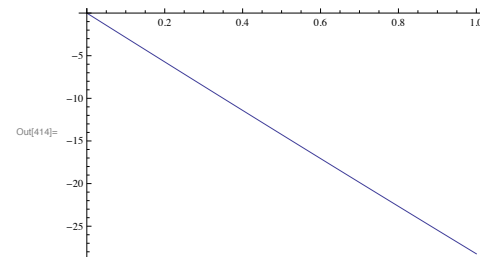

$$\text{In}[415]: \text{PsiAverageLower} = \psi_0 + \frac{Q L^2}{\Pi_\psi A_1 k_1 \lambda} * \int_0^1 \Psi[X] dx$$

Out[415]: -2.101

Putting back dimensions to find potential of lower epidermis

$$\text{In}[416]: a = \left( \frac{(q_{s1} + q_{r1}) L}{\Pi_\psi A_1 k_1 \lambda} - \frac{\text{Tran} L}{\Pi_\psi A_1 k_1 \lambda} \frac{A_1 k_{1h} + A_v k_{vh}}{A_v D_v C_{v\psi}} \right)$$

Out[416]: -0.806588

$$\text{In}[417]: aa = \frac{Q L^2}{\Pi_\psi A_1 k_1 \lambda}$$

Out[417]: 0.0290803

$$\text{In}[418]: \psi[x_] := \psi_0 + \left( \frac{x^2}{2 L^2} - \frac{x}{L} \right) aa + a \frac{x}{L}$$

$$\text{In}[419]: \psi_e = \psi[L]$$

Out[419]: -2.50914

$$\text{In}[420]: \psi_0$$

Out[420]: -1.68801

check averaging of potential in lower part of leaf

$$\text{In}[421]: \frac{1}{L} \int_0^L \psi[x] dx$$

Out[421]: -2.101

Solution lower thermal field

$$\text{In}[422]: \Pi_\theta = 1 + \frac{\lambda A_1 k_1}{A_1 k_{1h} + A_v k_{vh}} \frac{A_v D_v C_{v\psi}}{A_1 k_1 + A_v D_v C_{v\psi}} \frac{C_{v\theta}}{C_{v\psi}}$$

Out[422]: 1.12497

$$\text{In}[423]: \frac{1}{\Pi_\theta} + \frac{1}{\Pi_\psi} (* \text{test should equal 1} *)$$

Out[423]: 1.

$$\text{In}[424]: \beta = - \frac{(q_{s1} + q_{r1}) L}{Q L^2} - \frac{\lambda A_1 k_1 \text{Tran} L}{(A_1 k_1 + A_v D_v C_{v\psi}) Q L^2}$$

Out[424]: -3.89783

$$\text{In}[425]: \theta[x_] := - \frac{x^2}{2} + x + \beta x$$

Out[425]: Plot[theta[x], {x, 0, 1}]

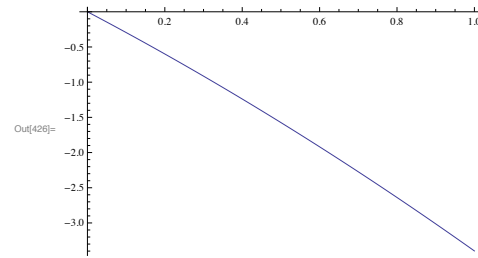

Putting back dimensions to find temperature at vasc plane

$$\text{In}[427]: bb = \frac{Q L^2}{\Pi_\theta (A_1 k_{1h} + A_v k_{vh})}$$

Out[427]: 0.0239005

$$\text{In}[428]: b = \left( - \frac{(q_{s1} + q_{r1}) L}{\Pi_\theta (A_1 k_{1h} + A_v k_{vh})} - \frac{\lambda A_1 k_1 \text{Tran} L}{\Pi_\theta (A_1 k_{1h} + A_v k_{vh})} \frac{1}{(A_1 k_1 + A_v D_v C_{v\psi})} \right)$$

Out[428]: -0.0931602

$$\text{In}[429]: d\theta[x_] := \left( - \frac{x^2}{2 L^2} + \frac{x}{L} \right) bb + b \frac{x}{L} (* \text{difference from vasc temp} *)$$

$$\text{In}[430]: d\theta[L]$$

Out[430]: -0.0812099

$$\text{In}[431]: \theta_0 = \theta_e - d\theta[L]$$

Out[431]: 302.061

Solution upper potential field

$$\text{In}[432]: \Pi U_\psi = 1 + \frac{AU_1 k_{1h} + AU_v k_{vh}}{\lambda AU_v D_v C_{v\theta}} + \frac{AU_1 k_{1h} + AU_v k_{vh}}{\lambda AU_1 k_1} \frac{C_{v\psi}}{C_{v\theta}}$$

Out[432]: 55.6804

$$\text{In}[433]: \frac{(q_{su} + q_{ru})}{QU LU}$$

Out[433]: 0.119492

$$\text{In}[434]: \Psi U[X\_] := \frac{x^2}{2} - x + \left( \frac{q_{su} + q_{ru}}{QU LU} \right) x$$

Out[435]: Plot[ΨU[X], {X, 0, 1}]

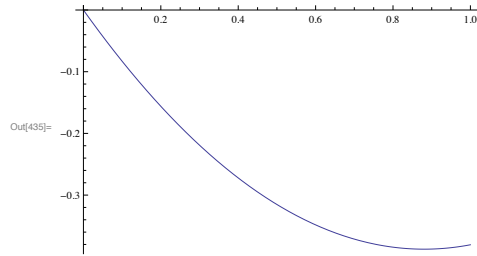

Putting back dimensions to find potential of upper epidermis

$$\text{In}[436]: \Psi U[x\_] := \psi_o + \left( \frac{x^2}{2 LU^2} - \frac{x}{LU} \right) \frac{QU LU^2}{\Pi U_o AU_1 k_1 \lambda} + \left( \frac{q_{su} + q_{ru}}{\Pi U_o AU_1 k_1 \lambda} \right) \frac{x}{LU}$$

Out[437]: Ψ<sub>u</sub> = ΨU[LU]

Out[437]: -1.69738

$$\text{In}[438]: \text{PsiAverageUpper} = \frac{1}{LU} \int_0^{LU} \Psi U[x] dx$$

Out[438]: -1.69475

Average leaf water potential as measured by pressure chamber

$$\text{In}[439]: \text{PsiAverageLeaf} = \frac{\text{PsiAverageUpper} LU AU_1 + \text{PsiAverageLower} L A_1}{AU_1 LU + A_1 L}$$

(\* liq vol weighted avg of 5 leaves -1.73, on tree analysis 2009.xcl\*)

Out[439]: -1.81379

Out[440]: ScaledPsiAverageLeaf = 0.65 \* (-1.29 - Ψ<sub>o</sub>) + Ψ<sub>o</sub>  
 (\* cf 0.65 for oak (scaled k est on tree and leaf paper); given true psie and psir as defined in numeric simulation gives average potential in domain. Justified if 1D steady sol is scaled to 3d as it is here \*)

Out[440]: -1.7167

Solution upper thermal field

$$\text{In}[441]: \Pi U_o = 1 + \frac{\lambda AU_1 k_1}{AU_1 k_{1h} + AU_v k_{vh}} \frac{AU_v D_v C_{v\psi}}{AU_1 k_1 + AU_v D_v C_{v\psi}} \frac{C_{v\theta}}{C_{v\psi}}$$

Out[441]: 1.01829

$$\text{In}[442]: \Theta U[X\_] := -\frac{x^2}{2} + x - \left( \frac{q_{su} + q_{ru}}{QU LU} \right) x$$

Out[443]: Plot[ΘU[X], {X, 0, 1}]

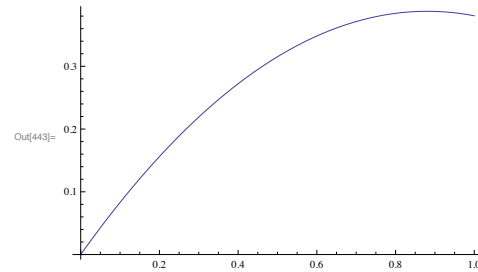

$$\text{In}[444]: \theta_u = \theta_o + \Theta U[1] \frac{QU LU^2}{\Pi U_o (AU_1 k_{1h} + AU_v k_{vh})}$$

Out[444]: 302.116

$$\text{In}[445]: \text{peak} = \theta_o + \Theta U[.85] \frac{QU LU^2}{\Pi U_o (AU_1 k_{1h} + AU_v k_{vh})}$$

Out[445]: 302.117

$$\text{In}[446]: \Theta U[x\_] := \theta_o + \left( -\frac{x^2}{2 LU^2} + \frac{x}{LU} \right) \frac{QU LU^2}{\Pi U_o (AU_1 k_{1h} + AU_v k_{vh})} - \left( \frac{q_{su} + q_{ru}}{\Pi U_o (AU_1 k_{1h} + AU_v k_{vh})} \right) \frac{x}{LU}$$

Out[447]: ΘU[LU]

Out[447]: 302.116

Chek that difference between lower and upper epidermal temps small

$$\text{In}[448]: \theta_e - \theta_u$$

Out[448]: -0.135644

$$\text{In}[449]: \frac{h_r (\theta_u - \theta_{bik})}{q_{ru}}$$

Out[449]: 1.00129

$$In[450]= \frac{k_{sh} (\theta_u - \theta_{air})}{\delta q_{su}}$$

Out[450]= 1.00251

## Evaluate fluxes

### Analyze proportion peristomatal at Lower Epidermis

$$In[451]= \text{ProportionPeristomatal} = \frac{-A_1 k_1 \partial_x \psi[x] /. x \rightarrow L}{Tran}$$

Out[451]= 0.744534

$$In[452]= \text{PropPeri} = \frac{-(q_{s1} + q_{r1})}{\Pi_\psi Tran \lambda} + \left( 1 + \frac{\lambda A_v D_v C_{v\psi}}{A_1 k_{1h} + A_v k_{vh}} + \frac{A_v D_v C_{v\psi}}{A_1 k_1} \right)^{-1}$$

Out[452]= 0.744534

$$In[453]= \frac{-(q_{s1} + q_{r1})}{\Pi_\psi Tran \lambda}$$

Out[453]= -0.0103015

$$In[454]= \text{ProportionInternalVapor} = \frac{-A_v D_v C_{v\psi} (\partial_x \psi[x] /. x \rightarrow L) - A_v D_v C_{v\psi} (\partial_x d\theta[x] /. x \rightarrow L)}{Tran}$$

Out[454]= 0.255466

$$In[455]= \text{ProportionPeristomatal} + \text{ProportionInternalVapor}$$

Out[455]= 1.

Peristomatal small if either of these two quantities are large (or sensible plus radiative >> latent):

$$In[456]= \frac{\lambda A_v D_v C_{v\psi}}{A_1 k_{1h} + A_v k_{vh}}$$

Out[456]= 0.147163

$$In[457]= \frac{A_v D_v C_{v\psi}}{A_1 k_1}$$

Out[457]= 0.17763

Condensation on lower epidermis if following is larger than one:

$$In[458]= \frac{(q_{s1} + q_{r1})}{Tran \lambda} \frac{\lambda A_v D_v C_{v\psi}}{A_1 k_{1h} + A_v k_{vh}}$$

Out[458]= 0.0136474

$$In[459]= \frac{(q_{s1} + q_{r1})}{Tran \lambda}$$

Out[459]= 0.0927366

$$In[460]= \frac{\lambda A_v D_v C_{v\psi}}{A_v k_{vh}}$$

Out[460]= 3.92619

$$In[461]= \text{VaporFluxintoLower} = \frac{-A_v D_v C_{v\psi} (\partial_x \psi[x] /. x \rightarrow 0) - A_v D_v C_{v\psi} (\partial_x d\theta[x] /. x \rightarrow 0)}{Tran}$$

Out[461]= 0.228623

$$In[462]= \text{LiquidFluxintoLower} = \frac{-A_1 k_1 \partial_x \psi[x] /. x \rightarrow 0}{Tran}$$

Out[462]= 0.771377

$$In[463]= \text{ProportionEvaporationLower} = \frac{A_1 k_1 \psi''[x] L}{Tran}$$

Out[463]= 0.026843

$$In[464]= \text{LiquidFluxintoLower} - \text{ProportionPeristomatal} - \text{ProportionEvaporationLower}$$

Out[464]=  $-7.28584 \times 10^{-17}$

$$In[465]= \text{ProportionEvaporationUpper} = \frac{AU_1 k_1 \psi U''[x] LU}{Tran}$$

Out[465]= 0.0173596

$$In[466]= \text{VaporFluxintoUpper} = \frac{-AU_v D_v C_{v\psi} (\partial_x \psi U[x] /. x \rightarrow 0) - AU_v D_v C_{v\psi} (\partial_x \theta U[x] /. x \rightarrow 0)}{Tran}$$

Out[466]= -0.0152853

$$In[467]= \text{CondensingVaporFluxUpper} = \frac{-\lambda AU_v D_v C_{v\psi} (\partial_x \psi U[x] /. x \rightarrow LU) - \lambda AU_v D_v C_{v\psi} (\partial_x \theta U[x] /. x \rightarrow LU)}{(q_{su} + q_{ru})}$$

Out[467]= 0.0179597

$$In[468]= \text{Perivacular} = \text{VaporFluxintoLower} + \text{VaporFluxintoUpper}$$

Out[468]= 0.213338

$$In[469]= \text{ProportionPeristomatal} + \text{Perivacular} + (-\text{VaporFluxintoUpper}) + \text{ProportionEvaporationLower}$$

Out[469]= 1.

$$In[470]= 1 - .736 - .015 - .027$$

Out[470]= 0.222

$$\text{In}[471]= \text{LiquidFluxintoUpper} = \frac{-\text{AU}_1 k_1 \partial_x \psi U[x] /. x \rightarrow 0}{\text{Tran}}$$

Out[471]= 0.0152853

Analyze how much of transpiration stream evaporates in upper part (equal to liquid flux in)

$$\text{In}[472]= \text{LIqFluxinUpper} = \frac{\text{QU LU}}{\text{PU}_\psi \text{Tran } \lambda} - \left( \frac{(\text{q}_{su} + \text{q}_{ru})}{\text{PU}_\psi \text{Tran } \lambda} \right)$$

Out[472]= 0.0152853

$$\text{In}[473]= \text{VaporFluxintoUpper} + \text{LiquidFluxintoUpper}$$

Out[473]=  $-1.73472 \times 10^{-18}$

$$\text{In}[474]= \frac{-(\text{AU}_1 k_{1h} + \text{AU}_v k_{vh}) \Theta U'[0]}{\text{QU LU}}$$

Out[474]= -0.864695

Check Energy balance of upper part

$$\text{In}[475]= \frac{-(\text{AU}_1 k_{1h} + \text{AU}_v k_{vh}) \Theta U'[0]}{1} - (\text{q}_{su} + \text{q}_{ru}) + \lambda (\text{AU}_1 k_1 \partial_x \psi U[x] /. x \rightarrow 0) + \text{QU LU}$$

Out[475]= 0.

Check Energy balance at vascular plane

$$\text{In}[476]= \text{DivVaporEnergy} = \lambda ((-\text{A}_v \text{D}_v \text{C}_{v\psi} (\partial_x \psi[x] /. x \rightarrow 0) - \text{A}_v \text{D}_v \text{C}_{v\theta} (\partial_x d\theta[x] /. x \rightarrow 0)) + (-\text{A}_v \text{D}_v \text{C}_{v\psi} (\partial_x \psi U[x] /. x \rightarrow 0) - \text{A}_v \text{D}_v \text{C}_{v\theta} (\partial_x \Theta U[x] /. x \rightarrow 0)))$$

Out[476]= 52.3718

$$\text{In}[477]= \text{DivConduction} = -(\text{AU}_1 k_{1h} + \text{AU}_v k_{vh}) \Theta U'[0] - (\text{A}_1 k_{1h} + \text{A}_v k_{vh}) d\theta'[0]$$

Out[477]= -52.3718

$$\text{In}[478]= \psi_0$$

Out[478]= -1.68801

$$\text{In}[479]= \theta_0$$

Out[479]= 302.061

$$\text{In}[480]= \text{Biotout} = \frac{\text{H L} (\psi_0 - \psi_e)}{(\text{A}_1 k_1 + \text{A}_v \text{D}_v \text{C}_{v\psi}) (\psi_0 - \psi_e) + \text{A}_v \text{D}_v \text{C}_{v\theta} (\theta_0 - \theta_e)}$$

Out[480]= 3.07923

$$\text{In}[481]= (\text{A}_1 k_1 + \text{A}_v \text{D}_v \text{C}_{v\psi}) (\psi_0 - \psi_e) + \text{A}_v \text{D}_v \text{C}_{v\theta} (\theta_0 - \theta_e)$$

Out[481]=  $5.28192 \times 10^{-7}$

$$\text{In}[482]= \text{sf} = (.151 \text{Biotout} + 1.03)^{-1}$$

Out[482]= 0.668913

$$\text{In}[483]= \text{nondnumericpsiavg} = .721 - \frac{.219}{\text{Biotout}}$$

Out[483]= 0.649878

## Plots

### Lower Potential

$$\text{In}[484]= \text{psiL} = \psi[x] /. x \rightarrow \text{L X}$$

Out[484]=  $-1.68801 - 0.806588 X + 0.0290803 (-1. X + 0.5 X^2)$

$$\text{In}[485]= \text{Plot}[\text{psiL}, \{X, 0, 1\}]$$

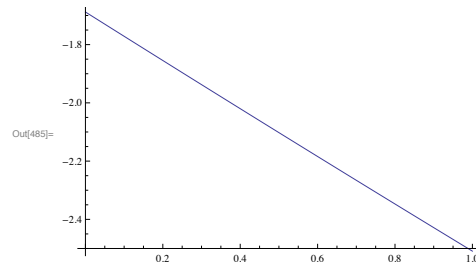

### Upper Potential

$$\text{In}[486]= \text{psiU} = \psi U[x] /. x \rightarrow \text{L U X}$$

Out[486]=  $-1.68801 + 0.00294372 X + 0.0246354 (-1. X + 0.5 X^2)$

```
In[487]:= Plot[psiU, {X, 0, 1}]
```

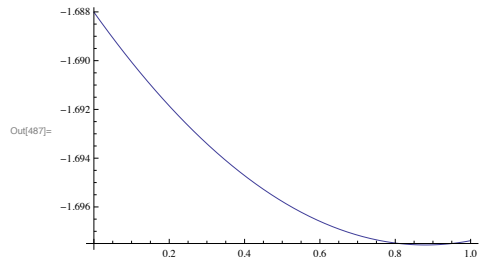

### Lower Thermal

```
In[488]:= thetaL = theta_0 + dtheta[x] /. x -> LX
```

```
Out[488]= 302.061 - 0.0931602 X + 0.0239005 (1. X - 0.5 X^2)
```

```
In[489]:= Plot[thetaL, {X, 0, 1}]
```

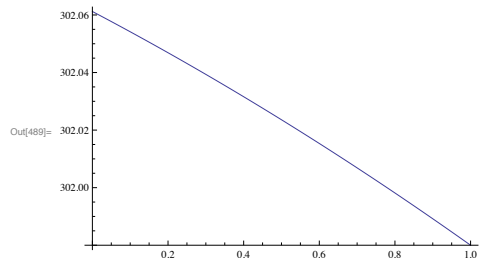

### Upper Thermal

```
In[490]:= thetaU = thetaU[x] /. x -> LX
```

```
Out[490]= 302.061 - 0.017094 X + 0.143056 (1. X - 0.5 X^2)
```

```
In[491]:= Plot[thetaU, {X, 0, 1}]
```

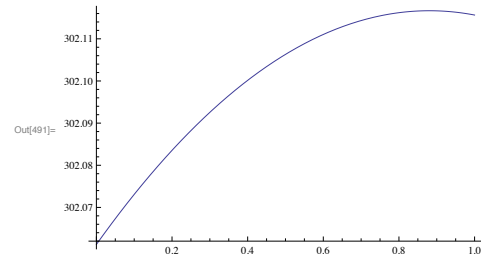

### Upper mol fraction

```
In[492]:= cU = c[psi, theta] /. psi -> psiU /. theta -> thetaU;
```

```
In[493]:= Plot[cU, {X, 0, 1}]
```

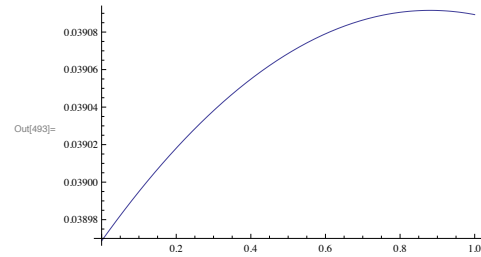

### Lower mol fraction

```
In[494]:= cL = c[psi, theta] /. psi -> psiL /. theta -> thetaL;
```

```
In[495]= Plot[cL, {X, 0, 1}]
```

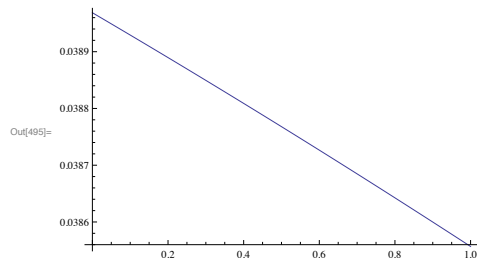

### Export plot data

```
In[496]= position = Range[-1, 1, .01];
```

```
In[497]= outpos = Table[0, {Length[position]}];
```

```
In[498]= potential = Table[0, {Length[position]}];
vapor = Table[0, {Length[position]}];
temperature = Table[0, {Length[position]}];
```

```
Do[
  If[ NonNegative[position[[i]]], potential[[i]] = psiL /. X -> position[[i]],
    potential[[i]] = psiU /. X -> -position[[i]],
  {i, Length[position]}]
Do[
  If[ NonNegative[position[[i]]],
    vapor[[i]] = cL /. X -> position[[i]], vapor[[i]] = cU /. X -> -position[[i]],
  {i, Length[position]}]
Do[
  If[ NonNegative[position[[i]]], temperature[[i]] = thetaL /. X -> position[[i]],
    temperature[[i]] = thetaU /. X -> -position[[i]],
  {i, Length[position]}]
Do[
  If[ NonNegative[position[[i]]],
    outpos[[i]] = L * position[[i]], outpos[[i]] = LU * position[[i]],
  {i, Length[position]}]
```

```
In[505]=  $\psi_0$ 
```

```
Out[505]= -1.68801
```

```
In[506]= opdata = Transpose[{outpos, potential}];
```

```
In[507]= otdata = Transpose[{outpos, temperature}];
```

```
In[508]= ocdata = Transpose[{outpos, vapor}];
```

```
In[509]= ListPlot[opdata, Joined -> True]
```

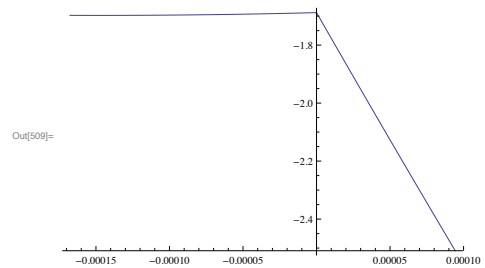

```
In[510]= ListPlot[ocdata, Joined -> True]
```

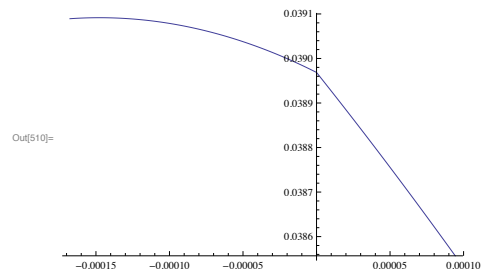

```
In[511]= ListPlot[otdata, Joined -> True]
```

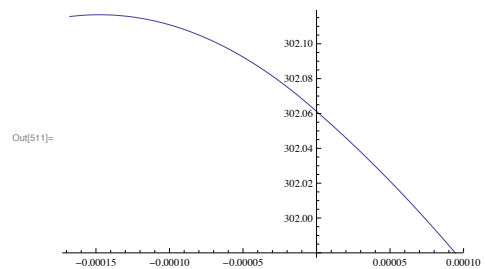

```
In[512]= (*SetDirectory[ToFileName[NotebookDirectory[]]]*)
```

```
In[513]= (*outfile="oak_cuvette_".*)
```

```
In[514]= (*Export[outfile<>"potential.xls", opdata]*)
```



```

ln[519]= (*Export[outfile<>"vapor.xls",ocdata]*)
ln[510]= (*Export[outfile<>"temperature.xls",otdata]*)

Remove["Global`*"]

```

## Exposed leaf solution for Red Oak

### Parameter values

Temp and potential for variable physical quantities: Update for approximate leaf temperature

```

θvar = 302.22; (* θair *)
ψvar = -1.69; (* ψr *)

vsf = .669 (* vasc scale factor steady
state based on geometry of veis and eff biot number*)
0.669

```

### Environmental parameters

```

R = 8.3145; (*gas constant Joules per mole per Kelvin*)

Patm = 1.013 * 10^5; (*atm pressure in Pa*)

θair = 273.15 + 28.31 (* air temp *)
301.46

θsur = θair;

χα[rh_, θ_] := rh (1.28  $\frac{R 298.15}{Patm} \text{Exp}[-\frac{44 000}{R} (\frac{1}{\theta} - \frac{1}{298.15})]$ )

χαir = χα[.437, θair] (* From Licor matching external conditions *)
0.0166338

PARout = 1700 (*PARo umol m-2 s-1*)
1700

αsr = 0.4 (* absorbance over all solar PAR+NIR, 400 to 3000 nm, range .4 to .6 *)
0.4

r = 0.15 (* reflectance of surroundings to solar radiation Nobel *)
0.15

```

```

Assimilation = 19.7 * 10^-6 (* mol m-2 s-1*)
0.0000197

AE = 479 000 * Assimilation (* 479 kJ per mole co2 fixed, J m-2 s-1 *)
FE = .01 αsr (  $\frac{1}{.45} * PARout * 10^(-6) * 2.35 * 10^5$  ) (1+r)
(* J m-2 s-1 Energy lost to fluorescence, 3% of abs vis *)
9.4363
4.08378

SRsun = αsr (  $\frac{1}{.45} * PARout * 10^(-6) * 2.35 * 10^5$  ) (1+r) - AE - FE
(* neglect refection *)
(* coeff J mol-1,
from Campbell intro env biophysics p 151: Total E incident is about 2x E in PAR,
so PAR plus NIR about equal to all E in PAR. OR 2.22 =1/.45 is factor
mult PAR capbell but also could subtract ps E at 479 kj per mol co2,
and then fluorescence too. ps here is 20 umol m-2 s-2 so -10 watts*)
394.858

N[479 * 20 * 10^-3]
9.58

windspeed = 3.86 (* Logan airport mean for day m s-1*)
3.86

Physical quantities: Update for approximate leaf temperature

Po = 1.28 R 298.15 * 10^(-6) (* ref vapor pressure MPA *)
0.00317308

Pa = Patm * 10^-6 (* atm pressure in MPa*)
0.1013

c[ψ_, θ_] := 1.28  $\frac{R 298.15}{Patm} \text{Exp}[-\frac{44 000}{R} (\frac{1}{\theta} - \frac{1}{298.15})]$ 
Exp[  $\frac{(\psi * Pa - Po) 18.07}{R \theta}$  ] (*mol fraction for psi in MPa*)

Cvθ = ∂θ c[ψvar, θ] /. θ → θvar (* linearization of dx/dT 1/k *)
Cvψ = ∂ψ c[ψ, θvar] /. ψ → ψvar (* linearization of dx/dpsi 1/mpa *)
0.00228015
0.000282819

```

```

λ = 44 000 - 43 (θvar - 298.15) (* Joules per Mol*)
43825.

(1.28 * (R 298.15 / Patm) * 18.07) / (R 298.15)
(c[ψvar, θvar] 18.07) / (R θvar)
0.000228328
0.000282819

Dv = (Patm / R θvar) * 2.13 * ((θvar / 273.15) ^ 1.8) *
10 ^ (-5) (* cDv for mol frac drving force out of leaf *)
0.00103012

kvh = .026; (* heat cond air J m-2 s-1 K-1*)
σ = 5.670373 * 10 ^ (-8); (*stefan boltzmann J/m2/s/kelvin-4 *)
F = 1; (*view factor radiative from leaf*)

eac = 1.72 * ((Patm * χa[.437, θair] / 1000 θair) ^ 1/7)
(*.32 rh logan airport,vapor pressure is in kpa, campbell p 162*)
0.819831

cloud = 0 (* fraction sky cloudy *)
0

ea = (1 - .84 cloud) eac + .84 cloud (* campbell p 162*)
0.819831

Leaf parameters

e1 = 0.96 (* emissivity leaf *)
0.96

α1 = e1 (* long wave abs leaf *)
0.96

gs = 0.3(* stomatal conductance mol m-2 s-1 , from cuvette data *)
0.3

charlength = .1 (* length normal to wind, m *)
0.1

```

```

δ = 4 * ((charlength / windspeed) ^ 1/2) * 10 ^ (-3) (* in m: cuvette leaf boundary layer*)
0.000643823

A1 = .7 (* .1263 oakair fraction, say 0.5 just mesophyll*)
Av = 1 - A1; (*Area fraction tissue in leaf from 2011 data 12.63%*)
0.7

AU1 = .95; (* .1263 oakair fraction, say 0.5 just mesophyll*)
AUv = 1 - AU1; (*Area fraction tissue in leaf from 2011 data 12.63%*)

L = .72 * 131 * 10 ^ (-6) (*-20 10 ^ (-6) *)
0.00009432

LU = 1.28 * 131 * 10 ^ (-6)
0.00016768

Check whole leaf air fraction
(L Av + LU AUv) / (L + LU) (*vol weighted area fractions *)
0.14

klh = .28614; (* heat cond tissue*)

ktotal = 6.45 * 10 ^ (-7); (* hyd cond leaf mol/m/s/mpa *)
k1 = (ktotal - .1263 Dv Cvψ) / (1 - .1263) (* hyd cond tissue *)
6.96124 * 10 ^ (-7)

H = .021;

HA = (0.021) * vsf (*mol/m2/s/MPa from vein cutting,
no steady state 1D scale factor *)
0.014049

ψr = -1.29; (* stem potential from cov'd leaf in mpa *)

Absorbed radiation

Q = 0.2 * SRsun / L (* w m-3 volumetric heat source,
.2 is fraction of total abs solar rad abs in spongy *)
837.272.

QU = 0.8 * SRsun / LU
1.88386 * 10 ^ 6

QL (* total solar in lower half of leaf*)
78.9715

```

QU LU  
315.886

Q L + Q U L U - S R s u n  
0.

## Description of fluxes and relations to env parameters

(\*delta is from licor 1.42 mol/m2/s g\_bw, d=Dv\*C\_a/g\_bw, C\_a=40.49 mol/m3\*)

$$q_{s1} = \frac{k_{vh}}{\delta} (\theta_{le} - \theta_{air});$$

$$q_{su} = \frac{k_{vh}}{\delta} (\theta_{ue} - \theta_{air});$$

$$q_{r1} = \sigma_{e1} \theta_{le}^4 - F_{a1} (\sigma \theta_{sur}^4);$$

$$q_{ru} = \sigma_{e1} \theta_{ue}^4 - F_{a1} (\sigma_{ea} \theta_{air}^4);$$

$$\chi[\psi_{-}, \theta_{-}] := 1.28 \frac{R 298.15}{P_{atm}} \text{Exp} \left[ -\frac{44000}{R} \left( \frac{1}{\theta} - \frac{1}{298.15} \right) \right] \text{Exp} \left[ \frac{(\psi + P_a - P_o) 18.02}{R \theta} \right]$$

(\*for psi in MPa\*)

$$\chi_e = \chi[\psi_{le}, \theta_{le}];$$

$$g_{b1} = \frac{2.13 * \left( \frac{\theta_{air}}{273.15} \right)^{1.8} * 10^{(-5)} P_{atm}}{R \theta_{air}}$$

(\* c(tair)\*Dv(Tair), boundary layer molar conductivity \*)

$$0.00102805$$

$$g_{b1} / \delta$$

$$1.59679$$

$$J_{tran} = \left( \frac{1}{g_s} + \frac{\delta}{g_{b1}} \right)^{-1} (\chi_e - \chi_{air});$$

$$\psi_o = \psi_r - J_{tran} / HA;$$

$$-1.29 - 17.9765 \left( -0.0166338 + 0.0313236 e^{-5291.96 \left( -0.00335402 + \frac{1}{\theta_{le}} \right) + \frac{2.1672 (0.0981269 + \psi_{le})}{\theta_{le}}} \right)$$

## Dimensionless parameters

$$\Pi\psi = 1 + \frac{A1 k_{lh} + A_v k_{vh}}{\lambda A_v D_v C_v \theta} + \frac{A1 k_{lh} + A_v k_{vh}}{\lambda A1 k_l} \frac{C_v \psi}{C_v \theta} \quad (* \text{ greater than one favors conduction over latent } *)$$

$$8.9473$$

$$\Pi\theta = 1 + \frac{\lambda A1 k_l}{A1 k_{lh} + A_v k_{vh}} \frac{A_v D_v C_v \theta}{A1 k_l + A_v D_v C_v \psi} \quad (* \text{ greater than one favors latent over conduction } *)$$

$$1.12583$$

$$\frac{1}{\Pi\theta} + \frac{1}{\Pi\psi} \quad (* \text{ test should equal 1 } *)$$

$$1.$$

$$\Pi U\psi = 1 + \frac{A_{U1} k_{lh} + A_{Uv} k_{vh}}{\lambda A_{Uv} D_v C_v \theta} + \frac{A_{U1} k_{lh} + A_{Uv} k_{vh}}{\lambda A_{U1} k_l} \frac{C_v \psi}{C_v \theta} \quad (* \text{ greater than one favors conduction over latent } *)$$

$$55.2365$$

$$\Pi U\theta = 1 + \frac{\lambda A_{U1} k_l}{A_{U1} k_{lh} + A_{Uv} k_{vh}} \frac{A_{Uv} D_v C_v \theta}{A_{U1} k_l + A_{Uv} D_v C_v \psi} \quad (* \text{ greater than one favors latent over conduction } *)$$

$$1.01844$$

$$\frac{1}{\Pi U\theta} + \frac{1}{\Pi U\psi} \quad (* \text{ test should equal 1 } *)$$

$$1.$$

## Global energy conservation

$$S R s u n == q_{su} + q_{ru} + q_{r1} + q_{s1} + \lambda J_{tran};$$

## Solution lower thermal field

$$\theta_1[x_{-}] := \theta_o + \left( -\frac{x^2}{2 L^2} + \frac{x}{L} \right) \frac{Q L^2}{\Pi\theta (A1 k_{lh} + A_v k_{vh})} + \left( -\frac{(q_{s1} + q_{r1}) L}{\Pi\theta (A1 k_{lh} + A_v k_{vh})} - \frac{\lambda A1 k_l J_{tran} L}{\Pi\theta (A1 k_{lh} + A_v k_{vh})} \frac{1}{(A1 k_l + A_v D_v C_v \psi)} \right) \frac{x}{L}$$

## Solution upper thermal field

$$\theta U[x_] := \theta_0 + \left( -\frac{x^2}{2LU^2} + \frac{x}{LU} \right) \frac{QU LU^2}{\Pi U \theta (AU1 klh + AUv kvh)} - \left( \frac{(qsu + qru) LU}{\Pi U \theta (AU1 klh + AUv kvh)} \right) \frac{x}{LU}$$

## Solution upper potential field

$$\psi U[x_] := \psi_0 + \left( \frac{x^2}{2LU^2} - \frac{x}{LU} \right) \frac{QU LU^2}{\Pi U \psi AU1 kl \lambda} + \left( \frac{(qsu + qru) LU}{\Pi U \psi AU1 kl \lambda} \right) \frac{x}{LU}$$

## Solution lower potential field

$$\psi l[x_] := \psi_0 + \left( \frac{x^2}{2L^2} - \frac{x}{L} \right) \frac{Q L^2}{\Pi \psi Al kl \lambda} + \left( \frac{(qsl + qrl) L}{\Pi \psi Al kl \lambda} - \frac{Jtran L}{\Pi \psi Al kl \lambda} - \frac{Al klh + Av kvh}{Av Dv Cv \theta} \right) \frac{x}{L}$$

## Solve system

```
sol =
FindRoot[{ {
   $\frac{\theta U[LU]}{\theta ue} = 1$ ,  $\frac{\theta l[L]}{\theta le} = 1$ ,  $SRSun == qsu + qru + qrl + qsl + \lambda Jtran$ ,  $\frac{\psi l[L]}{\psi le} = 1$  },
  { { $\theta_0$ ,  $\theta_{air}$ }, { $\theta_{ue}$ ,  $\theta_{air}$ }, { $\theta_{le}$ ,  $\theta_{air}$ }, { $\psi_{le}$ ,  $\psi_r$ }}, PrecisionGoal -> 4 ]
{ $\theta_0 \rightarrow 302.215$ ,  $\theta_{ue} \rightarrow 302.239$ ,  $\theta_{le} \rightarrow 302.134$ ,  $\psi_{le} \rightarrow -2.51429$ }
 $\psi_{ue} = \psi U[LU] /. sol$  (* Water potential upper epidermis *)
-1.6946
```

## Results

```
Temps = { $\theta_{air}$ ,  $\theta_{sur}$ ,  $\theta_{ue}$ ,  $\theta_0$ ,  $\theta_{le}$ } /. sol
{301.46, 301.46, 302.239, 302.215, 302.134}
```

```
Potentials = { $\psi_r$ ,  $\psi_0$ ,  $\psi_{ue}$ ,  $\psi_{le}$ } /. sol
{-1.29, -1.69032, -1.6946, -2.51429}
```

## Fluxes

```
qsu /. sol (*Sensible flux upper*)
31.4686
```

```
qru /. sol (*Radiative flux upper*)
85.6659
```

```
qsl /. sol (*Sensible flux lower*)
27.2113
```

```
qrl /. sol (*Radiative flux lower*)
4.03302
```

```
 $\lambda Jtran$  /. sol
246.479
```

```
Jtran /. sol
0.00562416
```

## Analyze proportion peristomatal at Lower Epidermis

```
ProportionPeristomatal =  $\frac{-Al kl \partial_x \psi l[x] /. x \rightarrow L}{Jtran}$  /. sol
0.73898
```

```
PropPeri =  $\frac{-(qsl + qrl)}{\Pi \psi Jtran \lambda} + \left( 1 + \frac{\lambda Av Dv Cv \theta}{Al klh + Av kvh} + \frac{Av Dv Cv \psi}{Al kl} \right)^{-1}$  /. sol
0.73898
```

```
 $\frac{-(qsl + qrl)}{\Pi \psi Jtran \lambda}$  /. sol
-0.0141677
```

```
 $\left( 1 + \frac{\lambda Av Dv Cv \theta}{Al klh + Av kvh} + \frac{Av Dv Cv \psi}{Al kl} \right)^{-1}$  /. sol
0.753147
```

```
ProportionInternalVapor =
 $\frac{-Av Dv Cv \psi (\partial_x \psi l[x] /. x \rightarrow L) - Av Dv Cv \theta (\partial_x \theta l[x] /. x \rightarrow L)}{Jtran}$  /. sol
0.26102
```

```
ProportionPeristomatal + ProportionInternalVapor
1.
```

## Condensation on lower epidermis if following is larger than one:

```
 $\frac{(qsl + qrl)}{Jtran \lambda} \frac{\lambda Av Dv Cv \theta}{Al klh + Av kvh}$  /. sol
0.0188113
```

### Origin of vapor internally transported

$$\text{VaporFluxintoLower} = \frac{-A_v D_v C_v \psi (\partial_x \psi l[x] /. x \rightarrow 0) - A_v D_v C_v \theta (\partial_x \theta l[x] /. x \rightarrow 0)}{J_{\text{tran}}} /. \text{sol}$$

0.225211

$$\text{ProportionEvaporationLower} = \frac{A_l k_l \psi l''[x] L}{J_{\text{tran}}} /. \text{sol}$$

0.0358095

$$\frac{Q L}{\Pi \psi \lambda J_{\text{tran}}} /. \text{sol} \text{ (*integrating evap 2nd derv over L *)}$$

0.0358095

$$\text{ProportionPeristomatal} + \text{VaporFluxintoLower} + \text{ProportionEvaporationLower} \text{ (* Check=1 *)}$$

1.

### Analyze evaporation in upper part of leaf

$$\text{LiquidFluxintoUpper} = \frac{-A_l k_l \partial_x \psi U[x] /. x \rightarrow 0}{J_{\text{tran}}} /. \text{sol}$$

0.0145984

$$\text{EvapOriginUpper} = \frac{Q U L U - (q_{su} + q_{ru})}{\Pi U \psi \lambda J_{\text{tran}}} /. \text{sol}$$

0.0145984

$$\text{VaporFluxintoUpper} = \frac{-A_u v D_v C_v \psi (\partial_x \psi U[x] /. x \rightarrow 0) - A_u v D_v C_v \theta (\partial_x \theta U[x] /. x \rightarrow 0)}{J_{\text{tran}}} /. \text{sol}$$

-0.0145984

$$\text{CondensationUpperEpidermis} = \frac{-A_u v D_v C_v \psi (\partial_x \psi U[x] /. x \rightarrow LU) - A_u v D_v C_v \theta (\partial_x \theta U[x] /. x \rightarrow LU)}{1} /. \text{sol}$$

0.0000483879

$$\text{FluxFromUpperEpidermis} = \frac{-A_l k_l \partial_x \psi U[x] /. x \rightarrow LU}{J_{\text{tran}}} /. \text{sol}$$

-0.00860357

$$\frac{\lambda}{Q U L U} \frac{-A_u v D_v C_v \psi (\partial_x \psi U[x] /. x \rightarrow LU) - A_u v D_v C_v \theta (\partial_x \theta U[x] /. x \rightarrow LU)}{1} /. \text{sol}$$

0.00671317

$$\frac{\lambda}{q_{su} + q_{ru}} \frac{-A_u v D_v C_v \psi (\partial_x \psi U[x] /. x \rightarrow LU) - A_u v D_v C_v \theta (\partial_x \theta U[x] /. x \rightarrow LU)}{1} /. \text{sol}$$

0.018104

$$q_{ru} /. \text{sol}$$

85.6659

$$\text{ConductiontoUepidermis} = \frac{-(A_l k_l h + A_u v k_v h) (\partial_x \theta U[x] /. x \rightarrow LU)}{Q U L U} /. \text{sol}$$

0.364099

$$\text{ConductiontoUvasplane} = \frac{-(A_l k_l h + A_u v k_v h) (\partial_x \theta U[x] /. x \rightarrow 0)}{Q U L U} /. \text{sol}$$

-0.617797

$$\text{ConductionLvasplane} = \frac{-(A_l k_l h + A_v k_v h) (\partial_x \theta l[x] /. x \rightarrow 0)}{Q U L U} /. \text{sol}$$

0.453461

$$\text{ConductionULratio} = \frac{-(\partial_x \theta U[x] /. x \rightarrow 0)}{-(\partial_x \theta l[x] /. x \rightarrow 0)} /. \text{sol}$$

-1.03801

$$\text{ConductionULratio} = \frac{-(A_l k_l h + A_u v k_v h) (\partial_x \theta U[x] /. x \rightarrow 0)}{-(A_l k_l h + A_v k_v h) (\partial_x \theta l[x] /. x \rightarrow 0)} /. \text{sol}$$

-1.3624

### Leaf water potential and apparent conductance

$$\text{LowerAvgPotential} = \frac{1}{L} \int_0^L \psi l[x] dx /. \text{sol}$$

-2.10555

$$\text{UpperAvgPotential} = \frac{1}{L U} \int_0^{L U} \psi U[x] dx /. \text{sol}$$

-1.69522

$$\text{LWP} = \frac{L \text{LowerAvgPotential} + L U \text{UpperAvgPotential}}{L + L U}$$

-1.84294

$$k_{\text{leaf}} = \frac{J_{\text{tran}}}{\psi r - \text{LWP}} /. \text{sol} \text{ (* Apparent conductance, mol m-2 s-1 MPa-1*)}$$

0.0101714

```

ApparentLength = (ProportionPeristomatal + 0.5 ProportionEvaporationLower)
(* Dist from evap site to vasc *)
0.756884

```

### Update and re-iterate for approximate leaf temp and potential

```

c[ψ-, e-] := 1.28  $\frac{R 298.15}{Patm} \text{Exp}\left[-\frac{44000}{R} \left(\frac{1}{\theta} - \frac{1}{298.15}\right)\right] \text{Exp}\left[\frac{\psi 18.07}{R \theta}\right]$ 
Cvψ - ∂ψ c[ψ, θ] /. ψ → ψ0 /. sol
2.82987 × 10-7
Cvθ - ∂θ c[ψ0, θ] /. θ → θ0 /. sol
2.14906 × 10-6
θvar - θ0 /. sol
0.00536141
ψvar - ψ0 /. sol
0.000324769
θ0 /. sol
302.215
ψ0 /. sol
-1.69032

```

### Plots

#### Lower Potential

```

psiL = ψ1[x] /. sol /. x → LX
-1.69032 - 0.804469 X + 0.038983 (-1. X + 0.5 X2)

```

Plot[psiL, {X, 0, 1}]

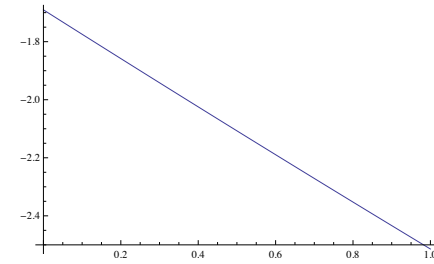

#### Upper Potential

```

psiU = ψU[x] /. sol /. x → LX
-1.69032 + 0.0122689 X + 0.0330867 (-1. X + 0.5 X2)

```

Plot[psiU, {X, 0, 1}]

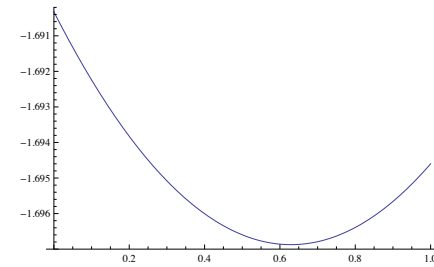

#### Lower Thermal

```

thetaL = θ1[x] /. sol /. x → LX
302.215 - 0.0967173 X + 0.0317932 (1. X - 0.5 X2)

```

Plot[thetaL, {X, 0, 1}]

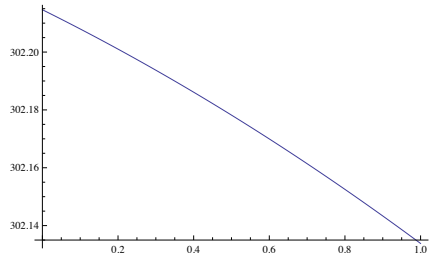

### Upper Thermal

thetaU = theta[x] /. sol /. x -> LU x  
 $302.215 - 0.0706086 X + 0.190416 (1. X - 0.5 X^2)$

Plot[thetaU, {X, 0, 1}]

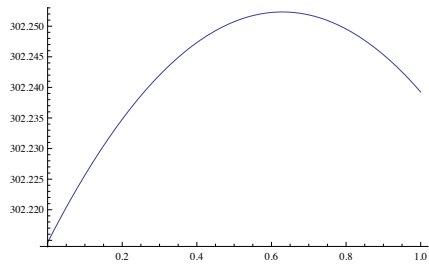

### Upper Vapor Concentration

cU = c[psi, theta] /. psi -> psiU /. theta -> thetaU;

Plot[cU, {X, 0, 1}]

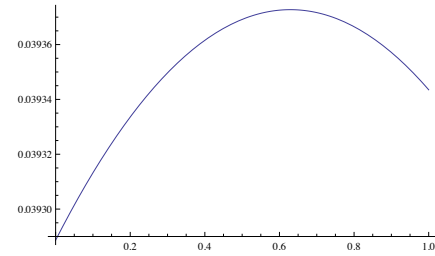

### Lower Vapor Concentration

cL = c[psi, theta] /. psi -> psiL /. theta -> thetaL;

Plot[cL, {X, 0, 1}]

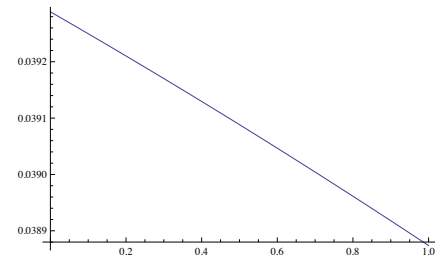

### Whole leaf vapor

Show[Plot[cU /. X -> -z, {z, 0, -1}], Plot[cL, {X, 0, 1}], PlotRange -> All]

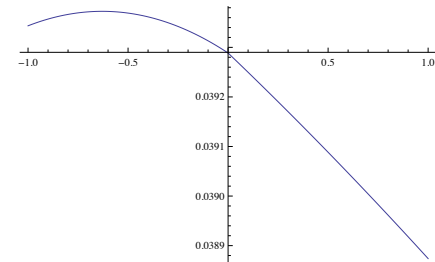

## Whole leaf temperature

```
Show[Plot[thetaU /. X -> -z, {z, 0, -1}], Plot[thetaL, {X, 0, 1}], PlotRange -> All]
```

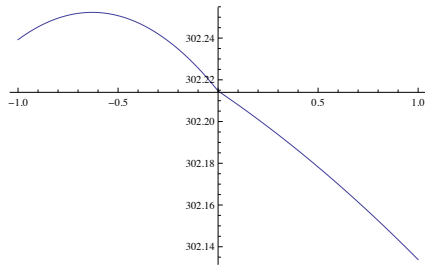

## Whole leaf potential

```
Show[Plot[psiU /. X -> -z, {z, 0, -1}], Plot[psiL, {X, 0, 1}],
ListPlot[{{0, psi_r}, {0, psi_o /. sol}], Joined -> True],
AxesOrigin -> {-1.1, psi_l /. sol}, PlotRange -> All]
```

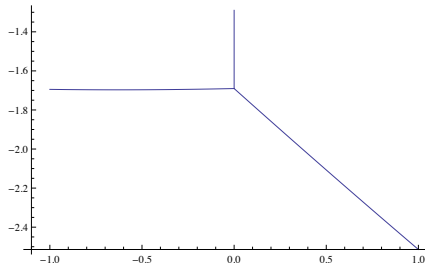

```
Biotout = 
$$\frac{HL(\psi_o - \psi_{le})}{(Al\ k_l + Av\ Dv\ Cv\psi)(\psi_o - \psi_{le}) + Av\ Dv\ Cv\theta(\theta_o - \theta_{le})} /. sol$$

3.07658
```

```

$$\frac{Av\ Dv\ Cv\psi(\psi_o - \psi_{le})}{Jtran\ L} /. sol$$


$$\frac{Av\ Dv\ Cv\theta(\theta_o - \theta_{le})}{Jtran\ L} /. sol$$

```

0.135757

0.107358

```
sf = (.151 Biotout + 1.03) ^ (-1)
0.669092
```

```
nondnumericpsiavg = .721 - 
$$\frac{.219}{Biotout}$$

0.649817
```

```
ScaledPsiAverageLeaf = nondnumericpsiavg * (-1.29 - psi_l) + psi_l /. sol
(* cf 0.65 for oak (scaled k est on tree and leaf paper): given true psie
and psir as defined in numeric simulation gives average potential in
domain. Justified if 1D steady sol is scaled to 3d as it is here *)
-1.71872
```

```
kleaf = Jtran / (psi_r - ScaledPsiAverageLeaf) /. sol
0.0131184
```

```
theta_o /. sol
302.215
```

```
psi_o /. sol
-1.69032
```

```
Tleaf = 273.15 + 28.83
301.98
```

```
theta_l - Tleaf /. sol
0.153818
```

```
Jtran /. sol
0.00562416
```

## Export plot data

```
position = Range[-1, 1, .01];
```

```
outpos = Table[0, {Length[position]}];
```



```

potential = Table[0, {Length[position]};
vapor = Table[0, {Length[position]};
temperature = Table[0, {Length[position]};

Do[
  If[ NonNegative[position[[i]]], potential[[i]] = psiL /. X -> position[[i]],
    potential[[i]] = psiU /. X -> -position[[i]],
    {i, Length[position]}]
Do[
  If[ NonNegative[position[[i]]],
    vapor[[i]] = cL /. X -> position[[i]], vapor[[i]] = cU /. X -> -position[[i]],
    {i, Length[position]}]
Do[
  If[ NonNegative[position[[i]]], temperature[[i]] = thetaL /. X -> position[[i]],
    temperature[[i]] = thetaU /. X -> -position[[i]],
    {i, Length[position]}]
Do[
  If[ NonNegative[position[[i]]],
    outpos[[i]] = L * position[[i]], outpos[[i]] = LU * position[[i]],
    {i, Length[position]}]

opdata = Transpose[{outpos, potential};

otdata = Transpose[{outpos, temperature};

ocdata = Transpose[{outpos, vapor};

ListPlot[opdata, Joined -> True]

```

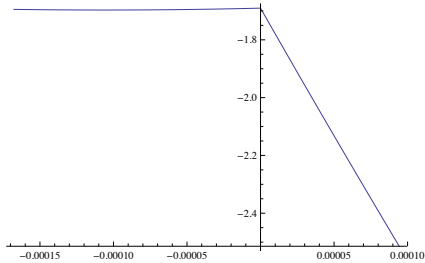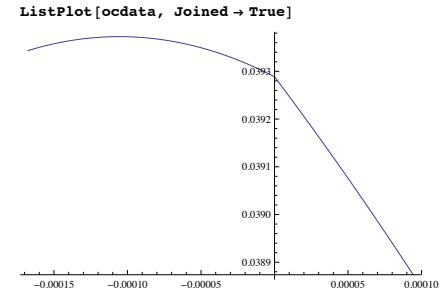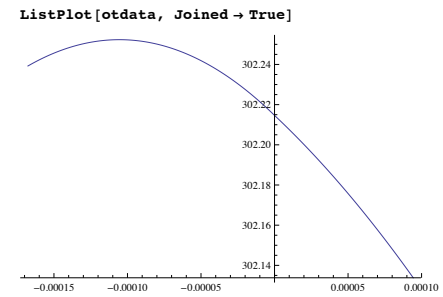

```

(*SetDirectory[ToFileName[NotebookDirectory[]] *])
/Users/Tony/Dropbox/Manuscripts/Active manuscripts/vapor and liquid/mol fraction

(*outfile="oak_numeric_")
oak_numeric_

(*Export[outfile<"potential.xls", opdata] *)
oak_numeric_potential.xls

(*Export[outfile<"vapor.xls", ocdata] *)
oak_numeric_vapor.xls

(*Export[outfile<"temperature.xls", otdata] *)
oak_numeric_temperature.xls

```
