# Supplementary material
Source: PubMed Central journal article supplement (PMC3982738)
Supplement: supp_pp.114.236323_236323Supplemental_Text_S4.pdf [file supp_pp.114.236323_236323Supplemental_Text_S4.pdf]

## Check neglect of convection of enthalpy terms

```

In[549]:= Remove["Global`*"]
In[550]:= evar = 298.15; (* eair *)
          pvar = 0; (* p_r *)
In[552]:= R = 8.3145; (*gas constant Joules per mole per Kelvin*)
In[553]:= Patm = 1.013 × 10^5; (*atm pressure in Pa*)
In[554]:= Al = .7 (* .1263 oakair fraction, say 0.5 just mesophyll*)
          Av = 1 - Al; (*Area fraction tissue in leaf from 2011 data 12.63%*)
Out[554]= 0.7
In[556]:= Cpv = 28.03; (* Heat Capacity water vapor J/mol at 100 c wiki *)
In[557]:= Cpl = 74.53; (* Heat Capacity water liquid J/mol at 100 or 25 c wiki *)
In[558]:= c[psi_, e_] := 1.28  $\frac{R 298.15}{Patm} \text{Exp}\left[-\frac{44000}{R} \left(\frac{1}{e} - \frac{1}{298.15}\right)\right]$ 
          Exp $\left[\frac{\psi 18.07}{R e}\right]$  (*mol fraction for psi in MPa*)
In[559]:= Cv e = D_e c[psi var, e] /. e -> evar (* linearization of dx/dT 1/k *)
          Cv psi = D_p c[psi, e var] /. psi -> psi var (* linearization of dx/dpsi 1/mpa *)
Out[559]= 0.00186474
Out[560]= 0.000228328
In[561]:= kvh = .026; (* heat cond air J m-2 s-1 K-1*)
In[562]:= kih = .28614; (* heat cond tissue*)
In[563]:= lambda = 44000 - 43 (evar - 298.15) (* Joules per Mol*)
Out[563]= 44000.
In[564]:= L = .72 × 131 × 10^(-6) (*-20 10^(-6)*)
Out[564]= 0.00009432
In[565]:= SRsun = 400
Out[565]= 400
In[566]:= Q = 0.2 * SRsun / L (* w m-3 volumetric heat source,
          .2 is fraction of total abs solar rad abs in spongy *)
Out[566]= 848176.
In[567]:= Dv =  $\frac{Patm}{R e var} 2.13 * \left(\frac{e var}{273.15}\right)^{1.8} *$ 
          10^(-5) (* cDv for mol frac drving force out of leaf *)
Out[567]= 0.00101901

```

```

In[568]:= kttotal = 6.45 × 10^(-7); (* hyd cond leaf mol/m/s/mpa *)
In[569]:= kl = (kttotal - .1263 Dv Cv psi) / (1 - .1263) (* hyd cond tissue *)
Out[569]= 7.04606 × 10^-7

```

## Groups

```

In[570]:= Pi psi = 1 +  $\frac{Al kih + Av kvh}{lambda Av Dv Cv e} + \frac{Al kih + Av kvh}{lambda Al kl} \frac{Cv psi}{Cv e}$ 
Out[570]= 10.4707

```

```

In[571]:= Pi e = 1 +  $\frac{lambda Al kl}{Al kih + Av kvh} \frac{Av Dv Cv e}{Al kl + Av Dv Cv psi}$ 
Out[571]= 1.10559

```

```

In[572]:=  $\frac{1}{Pi psi} + \frac{1}{Pi e}$ 
Out[572]= 1.

```

```

In[573]:= Delta e = -  $\frac{Q L^2}{Pi e (Al kih + Av kvh)}$ 
          (* Here neg as char gradients must have opp sign by mol con *)
Out[573]= -0.0327968

```

```

In[574]:= Delta psi =  $\frac{Q L^2}{Pi psi lambda Al kl}$ 
Out[574]= 0.0332065

```

## Terms

```

In[575]:= CondTerm =  $\frac{Al kih + Av kvh}{lambda Al kl} \left(\frac{Delta e}{Delta psi}\right)$ 
          MolTerm = -1

```

```

Out[575]= -9.47066
Out[576]= -1

```

```

In[577]:= MixTerm =  $\left(\frac{Cpl Delta e}{lambda} + \frac{Cpv Av Dv Cv psi Delta e}{lambda Al kl}\right)$ 
Out[577]= -0.0000585101

```

```

In[578]:= SqTerm =  $\frac{Cpv Av Dv Cv e}{lambda Al kl} \frac{Delta e^2}{Delta psi}$ 
Out[578]= 0.0000238498

```

```
In[579]:= SourceTerm =  $\frac{Q L^2}{\lambda A l k l \Delta\psi}$   
Out[579]= 10.4707
```

Noting that temp and psi char grads opposite signs, treat temp as neg rel to source

```
In[580]:= Econ = CondTerm + MolTerm - MixTerm + SqTerm + SourceTerm  
Out[580]= 0.00008236
```

```
In[581]:= MixTerm - SqTerm  
Out[581]= -0.00008236
```

```
In[582]:= CondTerm + MolTerm + SourceTerm  
Out[582]=  $1.77636 \times 10^{-15}$ 
```
