# Supplementary material
Source: PubMed Central journal article supplement (PMC3982738)
Supplement: supp_pp.114.236323_236323Supplemental_Text_S5.pdf [file supp_pp.114.236323_236323Supplemental_Text_S5.pdf]

# Sunflower model (Pieruschka et al. 2010)

Base case: cold mirror illumination of a leaf in a gas exchange cuvette

Note: Equation numbers reference main text unless otherwise specified.

In[368]= Remove["Global`\*"]

## Temperature

In[369]=  $\theta_{\text{airbase}} = 273.15 + 25$   
 (\* air temp preserves true mol fraction if change air temp in cuvette\*)  
 Out[369]= 298.15

In[370]=  $\theta_{\text{air}} = 273.15 + 25$  (\* air temp actual after a temp corr \*)  
 Out[370]= 298.15

In[371]=  $\theta_{\text{sur}} = \theta_{\text{air}}$ ; (\* for cuvette experiments all surfaces assumed at air temp \*)

## Soil dependance of $\psi/r$

In[372]=  $\psi_s = -.2$ ; (\* soil potential (assumed) mpa \*)

In[373]=  $\psi_r = \psi_s$  (\* stem potential (assumed) mpa, not modelling whole plant hydraulics \*)

Out[373]= -0.2

## Other Environmental parameters

In[374]=  $R = 8.3145$ ; (\*gas constant Joules per mole per Kelvin\*)

In[375]=  $P_{\text{atm}} = 1.013 \times 10^5$ ; (\*atm pressure in Pa\*)

In[376]=  $\chi_a[\text{rh}_-, \theta_-] := \text{rh} \left( 1.28 \frac{R 298.15}{P_{\text{atm}}} \text{Exp} \left[ -\frac{44000}{R} \left( \frac{1}{\theta} - \frac{1}{298.15} \right) \right] \right)$

In[377]=  $RH = .835$  (\* humidity in chamber free-air stream \*)

Out[377]= 0.835

In[378]=  $\chi_{\text{air}} = \chi_a[RH, \theta_{\text{airbase}}]$  (\* chamber mol fraction \*)

Out[378]= 0.0261552

2 | Sunflower model part 1.nb

In[379]=  $\chi_{\text{sat}} = \chi_a[1, \theta_{\text{airbase}}]$  (\* chamber saturated mol fraction \*)

Out[379]= 0.0313236

In[380]=  $SR_{\text{sun}} = 160$  (\* W m<sup>-2</sup>, short wave radiation load from light source per unit leaf area, eq \*)

Out[380]= 160

## Physical quantities

In[381]=  $P_o = 1.28 R 298.15 \times 10^{-6}$  (\* ref vapor pressure MPa \*)

Out[381]= 0.00317308

In[382]=  $P_a = P_{\text{atm}} \times 10^{-6}$  (\* atm pressure in MPa\*)

Out[382]= 0.1013

In[383]=  $c[\psi_-, \theta_-] := 1.28 \frac{R 298.15}{P_{\text{atm}}} \text{Exp} \left[ -\frac{44000}{R} \left( \frac{1}{\theta} - \frac{1}{298.15} \right) \right]$   
 $\text{Exp} \left[ \frac{(\psi + P_a - P_o) 18.07}{R \theta} \right]$  (\*mol fraction for  $\psi$  in MPa, Eqn. 1.4 \*)

In[384]=  $C_v \theta = \partial_{\theta} c[\psi_{\text{var}}, \theta] / . \theta \rightarrow \theta_{\text{var}}$ ;  
 (\* linearization of  $d\chi/dT$  1/K, eqn. 27 Supp. Text S1 \*)  
 $C_v \psi = \partial_{\psi} c[\psi, \theta_{\text{var}}] / . \psi \rightarrow \psi_{\text{var}}$ ;  
 (\* linearization of  $d\chi/d\psi$  1/MPa, eqn 26 Supp. Text S1\*)

In[385]=  $\lambda = 44000 - 43 (\theta_{\text{var}} - 298.15)$ ; (\* Joules per Mol, Latent heat\*)

In[386]=  $D_v = \frac{P_{\text{atm}}}{R \theta_{\text{var}}} 2.13 \times \left( \frac{\theta_{\text{var}}}{273.15} \right)^{1.8} \times 10^{-5}$ ;  
 (\*  $cD_v$  for mol frac driving force out of leaf \*)

In[387]=  $k_{\text{vh}} = .026$ ; (\* Thermal conductivity of air W m<sup>-2</sup> K<sup>-1</sup>\*)

In[388]=  $\sigma = 5.670373 \times 10^{-8}$ ; (\*stefan boltzmann W/m<sup>2</sup>/kelvin<sup>-4</sup> \*)

In[389]=  $F = 1$ ; (\*view factor radiative from leaf\*)

## Leaf parameters

In[390]=  $\epsilon_l = 0.96$ ; (\* emissivity leaf \*)

In[391]=  $\alpha_l = \epsilon_l$ ; (\* long wave absorptance leaf \*)

In[392]=  $A_l = .2$ ; (\* .1263 oakair fraction, say 0.5 just mesophyll\*)  
 $A_v = 1 - A_l$ ; (\*Area fraction tissue in leaf from 2011 data 12.63%\*)

In[393]=  $A_{U_l} = .8$ ; (\* .1263 oakair fraction, say 0.5 just mesophyll\*)  
 $A_{U_v} = 1 - A_{U_l}$ ; (\*Area fraction tissue in leaf from 2011 data 12.63%\*)

In[395]=  $L = 200 \times 10^{-6}$ ;

In[396]=  $LU = 200 \times 10^{-6}$ ;

Check whole leaf air fraction

```

In[397]:= 
$$\frac{L Av + LU AUv}{L + LU} \text{ (*vol weighted area fractions *)}$$

Out[397]= 0.5

In[398]:=  $klh = .2; \text{ (* Thermal conductivity of the cells, w m-1 K-1*)}$ 

In[399]:=  $kl = 1 \times 10^{-6}; \text{ (* hydraulic conductivity of the cells, mol m-1 MPa-1 s-1 *)}$ 

In[400]:=  $HA = (0.1); \text{ (*mol m-2 MPa-1 s-1, no steady state 1D scale factor *)}$ 

```

### Absorbed radiation

```

In[401]:=  $Q = 0.1 * SRSun / L; \text{ (* w m-3 volumetric heat source, .1 is fraction of total abs solar rad abs in spongy *)}$ 

In[402]:=  $QU = 0.9 * SRSun / L; \text{ (* w m-3 volumetric heat source, .9 is fraction of total abs solar rad abs in palisade *)}$ 

```

### Description of fluxes and relations to env parameters

```

In[403]:= 
$$gbl = \frac{2.13 * \left(\frac{\theta_{air}}{273.15}\right)^{1.8} * 10^{-5} Patm}{R \theta_{air}}; \text{ (* c(tair)*DV(Tair), boundary layer molar conductivity, mol m-1 s-1*)}$$


In[404]:= 
$$\delta = \left(\frac{2.13 * \left(\frac{\theta_{air}}{273.15}\right)^{1.8} * 10^{-5} Patm}{R \theta_{air}}\right) / 1.42;$$


(* boundary layer thickness, m eqn. 75 Suppl. text S1 *)

In[405]:=  $gbl / \delta$ 
Out[405]= 1.42

In[406]:= (* Li-cor one-sided boundary layer conductance is 1.42 mol/m2/s g_bw, d=Dv*C_a/g_bw C_a=40.49 mol/m3*)

In[407]:=  $qsl = \frac{kvh}{\delta} (\theta_{le} - \theta_{air}); \text{ (* eqn 1.32 *)}$ 

In[408]:=  $qsu = \frac{kvh}{\delta} (\theta_{ue} - \theta_{air}); \text{ (* eqn 1.32 *)}$ 

In[409]:=  $qrl = \sigma_{el} \theta_{le}^4 - F_{al} (\sigma \theta_{sur}^4); \text{ (* eqn 1.29 *)}$ 

In[410]:=  $qru = \sigma_{el} \theta_{ue}^4 - F_{al} (\sigma \theta_{sur}^4); \text{ (* eqn 1.29 *)}$ 

In[411]:=  $\chi[\psi_{-}, \theta_{-}] := 1.28 \frac{R 298.15}{Patm} \text{Exp}\left[-\frac{44000}{R} \left(\frac{1}{\theta} - \frac{1}{298.15}\right)\right] \text{Exp}\left[\frac{(\psi + Pa - Po) 18.07}{R \theta}\right]$ 
(*for  $\psi$  in MPa eqn. 1.4 *)

In[412]:=  $\chi_e = \chi[\psi_{le}, \theta_{le}]; \text{ (* mole fraction at lower epidermis (inside stomata) *)}$ 

```

```

In[413]:=  $\chi_{ue} = \chi[\psi_{ue}, \theta_{ue}]; \text{ (* mole fraction at upper epidermis (inside stomata) *)}$ 

In[414]:=  $J_{tran} = \left(\frac{1}{g_s} + \frac{\delta}{g_{bl}}\right)^{-1} (\chi_e - \chi_{air}); \text{ (* eqn 1.34 *)}$ 

In[415]:=  $UJ_{tran} = \left(\frac{1}{g_{su}} + \frac{\delta}{g_{bl}}\right)^{-1} (\chi_{ue} - \chi_{air}); \text{ (* eqn 1.34 *)}$ 

In[416]:=  $\psi_o = \psi_r - (J_{tran} + UJ_{tran}) / HA; \text{ (* eqn 1.4 *)}$ 
(* Describes potential drop from source to vacular plane in leaf *)

```

### Stomatal functions (based on matching total gs for cold mirror initial condition)

```

In[417]:=  $stomalow[ps\_] := 0.5363540283333067 \cdot (ps + .9) \cdot .6 (* gs \text{ max } 1.2 *)$ 

In[418]:=  $stomaup[psu\_] := 0.17186009317252962 \cdot (psu + 0.45) \cdot .6 (* gs \text{ max } 1.2 *)$ 

```

### Initial values

```

In[419]:=  $\psi_{rinit} = -.9;$ 

In[420]:=  $\psi_{rinitup} = -.45$ 

Out[420]= -0.45

In[421]:=  $\theta_{var} = \theta_{air}; \text{ (*  $\theta_{air}$  *)}$ 
 $\psi_{var} = \psi_{rinit}; \text{ (*  $\psi_r$  *)}$ 

```

### First iteration

```

In[423]:= 
$$\Pi\psi = 1 + \frac{Al k_{lh} + Av k_{vh}}{\lambda Av Dv Cv\theta} + \frac{Al k_{lh} + Av k_{vh}}{\lambda Al k_l} \frac{Cv\psi}{Cv\theta}$$

(* eqn. 1.10, greater than one favors conduction over latent *)

Out[423]= 2.75973

In[424]:= 
$$\Pi\theta = 1 + \frac{\lambda Al k_l}{Al k_{lh} + Av k_{vh}} \frac{Av Dv Cv\theta}{Al k_l + Av Dv Cv\psi}$$

(* eqn 1.12, greater than one favors latent over conduction *)

Out[424]= 1.56827

In[425]:= 
$$\Pi U\psi = 1 + \frac{AUl k_{lh} + AUv k_{vh}}{\lambda AUv Dv Cv\theta} + \frac{AUl k_{lh} + AUv k_{vh}}{\lambda AUl k_l} \frac{Cv\psi}{Cv\theta}$$

(* eqn. 1.10, greater than one favors conduction over latent *)

Out[425]= 11.5085

In[426]:= 
$$\Pi U\theta = 1 + \frac{\lambda AUl k_l}{AUl k_{lh} + AUv k_{vh}} \frac{AUv Dv Cv\theta}{AUl k_l + AUv Dv Cv\psi}$$

(* eqn 1.12, greater than one favors latent over conduction *)

Out[426]= 1.09516

```

Check that inverse sums equal one (eqn. 46):

$$\text{In}[427]= \frac{1}{\Pi\psi} + \frac{1}{\Pi\theta}$$

Out[427]= 1.

$$\text{In}[428]= \frac{1}{\Pi\psi\psi} + \frac{1}{\Pi\psi\theta}$$

Out[428]= 1.

### Global energy conservation

In[429]=  $SRsun == qsu + qru + qrl + qsl + \lambda Jtran + \lambda UJtran$ ; (\* eqn 1.39 \*)

### Solution lower thermal field

$$\text{In}[430]= \theta l[x_] := \theta o + \left( -\frac{x^2}{2L^2} + \frac{x}{L} \right) \frac{QL^2}{\Pi\theta (Al\ klh + Av\ kvh)} + \left( -\frac{(qsl + qrl)L}{\Pi\theta (Al\ klh + Av\ kvh)} - \frac{\lambda Al\ kl\ Jtran\ L}{\Pi\theta (Al\ klh + Av\ kvh)} \frac{1}{(Al\ kl + Av\ Dv\ Cv\psi)} \right) \frac{x}{L} \quad (* \text{ eqn 1.28} *)$$

### Solution upper thermal field

$$\text{In}[431]= \theta U[x_] := \theta o + \left( -\frac{x^2}{2LU^2} + \frac{x}{LU} \right) \frac{QU\ LU^2}{\Pi U\theta (AUl\ klh + AUv\ kvh)} + \left( -\frac{(qsu + qru)LU}{\Pi U\theta (AUl\ klh + AUv\ kvh)} - \frac{\lambda AUl\ kl\ UJtran\ LU}{\Pi U\theta (AUl\ klh + AUv\ kvh)} \frac{1}{(AUl\ kl + AUv\ Dv\ Cv\psi)} \right) \frac{x}{LU} \quad (* \text{ eqn 1.28} *)$$

### Solution upper potential field

$$\text{In}[432]= \psi U[x_] := \psi o + \left( \frac{x^2}{2LU^2} - \frac{x}{LU} \right) \frac{QU\ LU^2}{\Pi\psi AUl\ kl\ \lambda} + \left( \frac{(qsu + qru)LU}{\Pi\psi AUl\ kl\ \lambda} - \frac{UJtran\ LU}{\Pi\psi AUl\ kl\ \lambda} \frac{AUl\ klh + AUv\ kvh}{AUv\ Dv\ Cv\theta} \right) \frac{x}{LU} \quad (* \text{ eqn 1.27} *)$$

### Solution lower potential field

$$\text{In}[433]= \psi l[x_] := \psi o + \left( \frac{x^2}{2L^2} - \frac{x}{L} \right) \frac{QL^2}{\Pi\psi Al\ kl\ \lambda} + \left( \frac{(qsl + qrl)L}{\Pi\psi Al\ kl\ \lambda} - \frac{Jtran\ L}{\Pi\psi Al\ kl\ \lambda} \frac{Al\ klh + Av\ kvh}{Av\ Dv\ Cv\theta} \right) \frac{x}{L} \quad (* \text{ eqn 1.27} *)$$

### Solve system

In[434]= sol = FindRoot[{{ $\frac{\theta U[LU]}{\theta ue} == 1$ ,  $\frac{\theta l[L]}{\theta le} == 1$ ,  $SRsun == qsu + qru + qrl + qsl + \lambda Jtran + \lambda UJtran$ ,  
 $\frac{\psi l[L]}{\psi le} == 1$ ,  $\frac{\psi U[LU]}{\psi ue} == 1$ ,  $\frac{stomalow[\psi le]}{gs} == 1$ ,  $\frac{stomaup[\psi ue]}{gsu} == 1$ }},  
{ $\theta o, \theta air$ }, { $\theta ue, \theta air$ }, { $\theta le, \theta air$ }, { $\psi le, \psi rinit$ },  
{ $\psi ue, \psi rinitup$ }, { $gs, .3$ }, { $gsu, .3$ }}, PrecisionGoal -> 4]

Out[434]= { $\theta o \rightarrow 298.521$ ,  $\theta ue \rightarrow 298.541$ ,  $\theta le \rightarrow 298.413$ ,  
 $\psi le \rightarrow -0.906995$ ,  $\psi ue \rightarrow -0.45013$ ,  $gs \rightarrow 0.532157$ ,  $gsu \rightarrow 0.171782$ }

### update seed values

In[435]=  $\theta var = \theta o /. sol$   
 $\psi var = \psi o /. sol$

Out[435]= 298.521

Out[436]= -0.230118

### Second iteration

In[437]=  $Cv\theta = \partial_\theta c[\psi var, \theta] /. \theta \rightarrow \theta var$ ; (\* linearization of  $d\chi/dT$  1/k \*)  
 $Cv\psi = \partial_\psi c[\psi, \theta var] /. \psi \rightarrow \psi var$ ; (\* linearization of  $d\chi/dpsi$  1/mpa \*)

In[438]=  $\Pi\psi = 1 + \frac{Al\ klh + Av\ kvh}{\lambda Av\ Dv\ Cv\theta} + \frac{Al\ klh + Av\ kvh\ Cv\psi}{\lambda Al\ kl\ Cv\theta}$  (\* greater than one favors conduction over latent \*)

Out[438]= 2.73893

In[439]=  $\Pi\theta = 1 + \frac{\lambda Al\ kl}{Al\ klh + Av\ kvh} \frac{Av\ Dv\ Cv\theta}{Al\ kl + Av\ Dv\ Cv\psi}$   
(\* greater than one favors latent over conduction \*)

Out[439]= 1.57507

In[440]=  $\Pi U\psi = 1 + \frac{AUl\ klh + AUv\ kvh}{\lambda AUv\ Dv\ Cv\theta} + \frac{AUl\ klh + AUv\ kvh\ Cv\psi}{\lambda AUl\ kl\ Cv\theta}$  (\* greater than one favors conduction over latent \*)

Out[440]= 11.2662

In[441]=  $\Pi U\theta = 1 + \frac{\lambda AUl\ kl}{AUl\ klh + AUv\ kvh} \frac{AUv\ Dv\ Cv\theta}{AUl\ kl + AUv\ Dv\ Cv\psi}$   
(\* greater than one favors latent over conduction \*)

Out[441]= 1.09741

$$\text{In}[442]= \text{sol} = \text{FindRoot}\left[\left\{\frac{\theta U[\text{LU}]}{\theta u e} = 1, \frac{\theta l[\text{L}]}{\theta l e} = 1, \text{SRsun} == \text{qsu} + \text{qru} + \text{qrl} + \text{qsl} + \lambda \text{Jtran} + \lambda \text{UJtran}, \frac{\psi l[\text{L}]}{\psi l e} = 1, \frac{\psi U[\text{LU}]}{\psi u e} = 1, \frac{\text{stomalow}[\psi l e]}{\text{gs}} = 1, \frac{\text{stomaup}[\psi u e]}{\text{gsu}} = 1\right\}, \{\{\theta o, \theta \text{air}\}, \{\theta u e, \theta \text{air}\}, \{\theta l e, \theta \text{air}\}, \{\psi l e, \psi \text{rinit}\}, \{\psi u e, \psi \text{rinitup}\}, \{\text{gs}, .3\}, \{\text{gsu}, .3\}\}, \text{PrecisionGoal} \rightarrow 4\right]$$

Out[442]=  $\{\theta o \rightarrow 298.515, \theta u e \rightarrow 298.536, \theta l e \rightarrow 298.409, \psi l e \rightarrow -0.899661, \psi u e \rightarrow -0.450011, \text{gs} \rightarrow 0.536557, \text{gsu} \rightarrow 0.171854\}$

### update seed values

$$\text{In}[443]= \theta \text{var} = \theta o /. \text{sol}$$

$$\psi \text{var} = \psi o /. \text{sol}$$

Out[443]= 298.515

Out[444]= -0.230213

### Third iteration

$$\text{In}[445]= \text{Cv}\theta = \partial_{\theta} c[\psi \text{var}, \theta] /. \theta \rightarrow \theta \text{var}; (* \text{ linearization of } d\chi/dT \text{ 1/k} *)$$

$$\text{Cv}\psi = \partial_{\psi} c[\psi, \theta \text{var}] /. \psi \rightarrow \psi \text{var}; (* \text{ linearization of } d\chi/d\psi \text{ 1/mpa} *)$$

$$\text{In}[446]= \Pi\psi = 1 + \frac{\text{Al klh} + \text{Av kvh}}{\lambda \text{Av Dv Cv}\theta} + \frac{\text{Al klh} + \text{Av kvh}}{\lambda \text{Al kl}} \frac{\text{Cv}\psi}{\text{Cv}\theta} (* \text{ greater than one favors conduction over latent} *)$$

Out[446]= 2.73917

$$\text{In}[447]= \Pi\theta = 1 + \frac{\lambda \text{Al kl}}{\text{Al klh} + \text{Av kvh}} \frac{\text{Av Dv Cv}\theta}{\text{Al kl} + \text{Av Dv Cv}\psi} (* \text{ greater than one favors latent over conduction} *)$$

Out[447]= 1.57499

$$\text{In}[448]= \Pi\psi\psi = 1 + \frac{\text{AUL klh} + \text{AUV kvh}}{\lambda \text{AUV Dv Cv}\theta} + \frac{\text{AUL klh} + \text{AUV kvh}}{\lambda \text{AUL kl}} \frac{\text{Cv}\psi}{\text{Cv}\theta} (* \text{ greater than one favors conduction over latent} *)$$

Out[448]= 11.269

$$\text{In}[449]= \Pi\theta\theta = 1 + \frac{\lambda \text{AUL kl}}{\text{AUL klh} + \text{AUV kvh}} \frac{\text{AUV Dv Cv}\theta}{\text{AUL kl} + \text{AUV Dv Cv}\psi} (* \text{ greater than one favors latent over conduction} *)$$

Out[449]= 1.09738

$$\text{In}[450]= \text{sol} = \text{FindRoot}\left[\left\{\frac{\theta U[\text{LU}]}{\theta u e} = 1, \frac{\theta l[\text{L}]}{\theta l e} = 1, \text{SRsun} == \text{qsu} + \text{qru} + \text{qrl} + \text{qsl} + \lambda \text{Jtran} + \lambda \text{UJtran}, \frac{\psi l[\text{L}]}{\psi l e} = 1, \frac{\psi U[\text{LU}]}{\psi u e} = 1, \frac{\text{stomalow}[\psi l e]}{\text{gs}} = 1, \frac{\text{stomaup}[\psi u e]}{\text{gsu}} = 1\right\}, \{\{\theta o, \theta \text{air}\}, \{\theta u e, \theta \text{air}\}, \{\theta l e, \theta \text{air}\}, \{\psi l e, \psi \text{rinit}\}, \{\psi u e, \psi \text{rinitup}\}, \{\text{gs}, .3\}, \{\text{gsu}, .3\}\}, \text{PrecisionGoal} \rightarrow 4\right]$$

Out[450]=  $\{\theta o \rightarrow 298.516, \theta u e \rightarrow 298.536, \theta l e \rightarrow 298.409, \psi l e \rightarrow -0.899748, \psi u e \rightarrow -0.450012, \text{gs} \rightarrow 0.536505, \text{gsu} \rightarrow 0.171853\}$

### update seed values

$$\text{In}[451]= \theta \text{var} = \theta o /. \text{sol}$$

$$\psi \text{var} = \psi o /. \text{sol}$$

Out[451]= 298.516

Out[452]= -0.230212

### Fourth iteration

$$\text{In}[453]= \text{Cv}\theta = \partial_{\theta} c[\psi \text{var}, \theta] /. \theta \rightarrow \theta \text{var}; (* \text{ linearization of } d\chi/dT \text{ 1/k} *)$$

$$\text{Cv}\psi = \partial_{\psi} c[\psi, \theta \text{var}] /. \psi \rightarrow \psi \text{var}; (* \text{ linearization of } d\chi/d\psi \text{ 1/mpa} *)$$

$$\text{In}[454]= \Pi\psi = 1 + \frac{\text{Al klh} + \text{Av kvh}}{\lambda \text{Av Dv Cv}\theta} + \frac{\text{Al klh} + \text{Av kvh}}{\lambda \text{Al kl}} \frac{\text{Cv}\psi}{\text{Cv}\theta} (* \text{ greater than one favors conduction over latent} *)$$

Out[454]= 2.73917

$$\text{In}[455]= \Pi\theta = 1 + \frac{\lambda \text{Al kl}}{\text{Al klh} + \text{Av kvh}} \frac{\text{Av Dv Cv}\theta}{\lambda \text{Al kl}} (* \text{ greater than one favors latent over conduction} *)$$

Out[455]= 0.891892

$$\text{In}[456]= \Pi\psi\psi = 1 + \frac{\text{Al klh} + \text{Av kvh}}{\lambda \text{Al kl}} \frac{\text{Cv}\psi}{\text{Cv}\theta}$$

Out[456]= 0.847276

$$\text{In}[457]= \frac{\text{Cv}\psi}{\text{Cv}\theta}$$

Out[457]= 0.122588

$$\text{In}[458]= \Pi\theta = 1 + \frac{\lambda \text{Al kl}}{\text{Al klh} + \text{Av kvh}} \frac{\text{Av Dv Cv}\theta}{\text{Al kl} + \text{Av Dv Cv}\psi} (* \text{ greater than one favors latent over conduction} *)$$

Out[458]= 1.57499

$$\text{In}[459]= \text{PIU}\psi = 1 + \frac{\text{AUI klh} + \text{AUv kvh}}{\lambda \text{AUv Dv Cv}\theta} + \frac{\text{AUI klh} + \text{AUv kvh}}{\lambda \text{AUI kl}} \frac{\text{Cv}\psi}{\text{Cv}\theta} \quad (* \text{ greater than one favors conduction over latent } *)$$

Out[459]= 11.269

$$\text{In}[460]= \text{PIU}\theta = 1 + \frac{\lambda \text{AUI kl}}{\text{AUI klh} + \text{AUv kvh}} \frac{\text{AUv Dv Cv}\theta}{\text{AUI kl} + \text{AUv Dv Cv}\psi} \quad (* \text{ greater than one favors latent over conduction } *)$$

Out[460]= 1.09738

$$\text{In}[461]= \text{sol} = \text{FindRoot}\left[\left\{\left\{\frac{\theta\text{U}[\text{LU}]}{\theta\text{ue}} = 1, \frac{\theta\text{l}[\text{L}]}{\theta\text{le}} = 1, \text{SRsun} == \text{gsu} + \text{qru} + \text{qrl} + \text{qsl} + \lambda \text{Jtr} + \lambda \text{UJtr}, \frac{\psi\text{l}[\text{L}]}{\psi\text{le}} = 1, \frac{\psi\text{U}[\text{LU}]}{\psi\text{ue}} = 1, \frac{\text{stomalow}[\psi\text{le}]}{\text{gs}} = 1, \frac{\text{stomaup}[\psi\text{ue}]}{\text{gsu}} = 1\right\}, \{\{\theta\text{o}, \theta\text{air}\}, \{\theta\text{ue}, \theta\text{air}\}, \{\theta\text{le}, \theta\text{air}\}, \{\psi\text{le}, \psi\text{rinit}\}, \{\psi\text{ue}, \psi\text{rinitup}\}, \{\text{gs}, .3\}, \{\text{gsu}, .3\}\}, \text{PrecisionGoal} \rightarrow 4\right]$$

Out[461]=  $\{\theta\text{o} \rightarrow 298.516, \theta\text{ue} \rightarrow 298.536, \theta\text{le} \rightarrow 298.409, \psi\text{le} \rightarrow -0.899747, \psi\text{ue} \rightarrow -0.450012, \text{gs} \rightarrow 0.536506, \text{gsu} \rightarrow 0.171853\}$

### check convergence

$$\text{In}[462]= \theta\text{var} - \theta\text{o} /. \text{sol}$$

Out[462]=  $7.24439 \times 10^{-7}$

$$\text{In}[463]= \psi\text{var} - \psi\text{o} /. \text{sol}$$

Out[463]=  $1.31368 \times 10^{-8}$

### Results

$$\text{In}[464]= \text{MolFrac} = \{(\chi\text{e} - \chi\text{air}), (\chi\text{ue} - \chi\text{air}), \chi\text{e}, \chi\text{ue}, \chi\text{air}\} /. \text{sol} \quad (* \text{ target at Q160 is .0054 } *)$$

Out[464]=  $\{0.00546984, 0.00581404, 0.031625, 0.0319692, 0.0261552\}$

$$\text{In}[465]= \text{Temps} = \{\theta\text{air}, \theta\text{sur}, \theta\text{ue}, \theta\text{o}, \theta\text{le}, \theta\text{le} - \theta\text{air}\} /. \text{sol}$$

Out[465]=  $\{298.15, 298.15, 298.536, 298.516, 298.409, 0.259177\}$

$$\text{In}[466]= \text{Potentials} = \{\psi\text{r}, \psi\text{o}, \psi\text{ue}, \psi\text{le}\} /. \text{sol}$$

Out[466]=  $\{-0.2, -0.230212, -0.450012, -0.899747\}$

$$\text{In}[467]= \text{gs} /. \text{sol} \quad (* \text{ target at Q160 is .7 } *)$$

Out[467]= 0.536506

$$\text{In}[468]= \text{gsu} /. \text{sol}$$

Out[468]= 0.171853

$$\text{In}[469]= \text{totalgs} = \text{gs} + \text{gsu} /. \text{sol}$$

Out[469]= 0.708359

### Fluxes

$$\text{In}[470]= \text{qsu} /. \text{sol} \quad (* \text{Sensible flux upper} *)$$

Out[470]= 13.9944

$$\text{In}[471]= \text{qru} /. \text{sol} \quad (* \text{Radiative flux upper} *)$$

Out[471]= 2.23337

$$\text{In}[472]= \text{qsl} /. \text{sol} \quad (* \text{Sensible flux lower} *)$$

Out[472]= 9.39029

$$\text{In}[473]= \text{qrl} /. \text{sol} \quad (* \text{Radiative flux lower} *)$$

Out[473]= 1.49765

$$\text{In}[474]= \text{latentlow} = \lambda \text{Jtr} /. \text{sol}$$

Out[474]= 93.6814

$$\text{In}[475]= \text{latentup} = \lambda \text{UJtr} /. \text{sol}$$

Out[475]= 39.2029

$$\text{In}[476]= \text{totallatent} = \text{latentlow} + \text{latentup}$$

Out[476]= 132.884

$$\text{In}[477]= \text{tranlow} = \text{Jtr} /. \text{sol} \quad (* \text{ target at Q160 is .003 } *)$$

Out[477]= 0.00212988

$$\text{In}[478]= \text{tranup} = \text{UJtr} /. \text{sol}$$

Out[478]= 0.000891293

$$\text{In}[479]= \text{totaltran} = \text{tranlow} + \text{tranup}$$

Out[479]= 0.00302118

### Matching Q160

$$\text{In}[480]= \text{totaltran} \quad (* \text{ expect about .0031 } *)$$

Out[480]= 0.00302118

$$\text{In}[481]= \text{blMFdrop} = \text{totaltran} / 2.84$$

Out[481]= 0.00106379

$$\text{In}[482]= \chi\text{surf} = \chi\text{air} + \text{blMFdrop} \quad (* \text{ app mol frac at leaf surface } *)$$

Out[482]= 0.027219

In[483]= **appgradientLS** =  $\chi_e - \chi_{surf}$  /. sol (\* app MF grad at leaf surf exp .0044 \*)  
 Out[483]= 0.00440604

In[484]= **appgst** =  $\left( \frac{(\chi_e - \chi_{air})}{totaltran} - \frac{1}{2.84} \right)^{-1}$  /. sol (\* 0.7 target \*)  
 Out[484]= 0.68569

### Evaporation distribution percent of totals

In[485]= **LiquidtoLower** =  $\frac{-A1\ k1\ \partial_x\ \psi1[x] /. x \rightarrow L}{Jtran + UJtran}$  /. sol (\* eqn 1.41 \*)  
 Out[485]= 0.199635

In[486]= **LiquidtoUpper** =  $\frac{-AU1\ k1\ \partial_x\ \psi U[x] /. x \rightarrow LU}{Jtran + UJtran}$  /. sol (\* eqn 1.41 \*)  
 Out[486]= 0.242932

In[487]= **VaportoLower** =  
 $(-Av\ Dv\ Cv\ \psi (\partial_x\ \psi1[x] /. x \rightarrow L) - Av\ Dv\ Cv\ \theta (\partial_x\ \theta1[x] /. x \rightarrow L)) / (Jtran + UJtran)$  /. sol  
 Out[487]= 0.50535

In[488]= **VaportoUpper** =  $(-AUv\ Dv\ Cv\ \psi (\partial_x\ \psi U[x] /. x \rightarrow LU) - AUv\ Dv\ Cv\ \theta (\partial_x\ \theta U[x] /. x \rightarrow LU)) / (Jtran + UJtran)$  /. sol  
 (\*Sum of VaportoUpper and VaportoLower is given by eqn 1.44)

In[488]= **(LiquidtoLower + LiquidtoUpper + VaportoLower + VaportoUpper)**  
 Out[488]= 0.947917 + VaportoUpper

### Condensation on lower epidermis if following is larger than one:

In[489]=  $\frac{(qs1 + qr1)}{Jtran\ \lambda} \frac{\lambda\ Av\ Dv\ Cv\ \theta}{A1\ klh + Av\ kvh}$  /. sol (\* eqn 1.42 \*)  
 Out[489]= 0.130311

### Condensation on upper epidermis if following is larger than one:

In[490]=  $\frac{(qsu + qru)}{UJtran\ \lambda} \frac{\lambda\ AUv\ Dv\ Cv\ \theta}{AU1\ klh + AUv\ kvh}$  /. sol (\* eqn 1.42 \*)  
 Out[490]= 0.0427033

### Leaf water potential and apparent conductance

In[491]= **LowerAvgPotential** =  $\frac{1}{L} \int_0^L \psi1[x] dx$  /. sol  
 Out[491]= -0.576046

In[492]= **UpperAvgPotential** =  $\frac{1}{LU} \int_0^{LU} \psi U[x] dx$  /. sol  
 Out[492]= -0.346164

In[493]= **LWP** =  $\frac{L\ LowerAvgPotential + LU\ UpperAvgPotential}{L + LU}$  (\* eqn 1.45 \*)  
 Out[493]= -0.461105

### Naive view of gradients

In[494]= **Kleaf** =  $\frac{Jtran}{\psi r - LWP}$  /. sol (\* Apparent conductance, mol m-2 s-1 MPa-1\*)  
 Out[494]= 0.00815719

### Analysis

#### Analyze proportion peristomatal at Lower Epidermis

In[495]= **ProportionPeristomatal** =  $\frac{-A1\ k1\ \partial_x\ \psi1[x] /. x \rightarrow L}{Jtran + UJtran}$  /. sol  
 Out[495]= 0.199635

In[496]= **PropPeri** =  $\frac{-(qs1 + qr1)}{\Pi\psi\ Jtran\ \lambda} + \left( 1 + \frac{\lambda\ Av\ Dv\ Cv\ \theta}{A1\ klh + Av\ kvh} + \frac{Av\ Dv\ Cv\ \psi}{A1\ k1} \right)^{-1}$  /. sol  
 Out[496]= 0.283177

In[497]=  $\frac{-(qs1 + qr1)}{\Pi\psi\ Jtran\ \lambda}$  /. sol  
 Out[497]= -0.04243

In[498]=  $\left( 1 + \frac{\lambda\ Av\ Dv\ Cv\ \theta}{A1\ klh + Av\ kvh} + \frac{Av\ Dv\ Cv\ \psi}{A1\ k1} \right)^{-1}$  /. sol  
 Out[498]= 0.325607

#### Evaporation in lower

In[499]= **ProportionEvaporationLower** =  $\frac{A1\ k1\ \psi1'[x] L}{Jtran + UJtran}$  /. sol  
 Out[499]= 0.0439569

In[500]=  $\frac{Q\ L}{\Pi\psi\ \lambda\ Jtran}$  /. sol (\*integrating evap 2nd derv over L \*)  
 Out[500]= 0.0623516

## Analyze evaporation in upper part of leaf

$$\text{In}[501]= \text{ProportionEvaporationUpper} = \frac{\text{AU1 k1 } \psi U' [x] \text{ LU}}{\text{Jtran} + \text{UJtran}} /. \text{sol}$$

Out[501]= 0.096162

$$\text{In}[502]= \text{VaportoUpperEpidermis} = \frac{(-\text{AUv Dv Cv} \psi' (\partial_x \psi U [x] /. x \rightarrow \text{LU}) - \text{AUv Dv Cv} \theta' (\partial_x \theta U [x] /. x \rightarrow \text{LU}))}{(\text{Jtran} + \text{UJtran})} /. \text{sol}$$

Out[502]= 0.0520832

$$\text{In}[503]= \text{LiquidtoUpperEpidermis} = \frac{-\text{AU1 k1 } \partial_x \psi U [x] /. x \rightarrow \text{LU}}{\text{Jtran} + \text{UJtran}} /. \text{sol}$$

Out[503]= 0.242932

$$\text{In}[504]= \frac{\lambda}{\text{QU LU}} \frac{1}{1} \frac{(-\text{AUv Dv Cv} \psi' (\partial_x \psi U [x] /. x \rightarrow \text{LU}) - \text{AUv Dv Cv} \theta' (\partial_x \theta U [x] /. x \rightarrow \text{LU}))}{1} /. \text{sol}$$

Out[504]= 0.0480628

$$\text{In}[505]= \frac{\lambda}{\text{qsu} + \text{qru}} \frac{1}{1} \frac{(-\text{AUv Dv Cv} \psi' (\partial_x \psi U [x] /. x \rightarrow \text{LU}) - \text{AUv Dv Cv} \theta' (\partial_x \theta U [x] /. x \rightarrow \text{LU}))}{1} /. \text{sol}$$

Out[505]= 0.426494

$$\text{In}[506]= \text{qru} /. \text{sol}$$

Out[506]= 2.23337

## Perivascular vapor

$$\text{In}[507]= \text{VaporFluxintoLower} = \frac{(-\text{Av Dv Cv} \psi' (\partial_x \psi l [x] /. x \rightarrow 0) - \text{Av Dv Cv} \theta' (\partial_x \theta l [x] /. x \rightarrow 0))}{(\text{Jtran} + \text{UJtran})} /. \text{sol}$$

Out[507]= 0.461393

$$\text{In}[508]= \text{VaporFluxintoUpper} = \frac{(-\text{AUv Dv Cv} \psi' (\partial_x \psi U [x] /. x \rightarrow 0) - \text{AUv Dv Cv} \theta' (\partial_x \theta U [x] /. x \rightarrow 0))}{(\text{Jtran} + \text{UJtran})} /. \text{sol}$$

Out[508]= -0.0440788

$$\text{In}[509]= \text{PerivascularEvap} = \text{VaporFluxintoLower} + \text{VaporFluxintoUpper}$$

Out[509]= 0.417314

$$\text{In}[510]= \text{ProportionPeristomatal} + \text{PerivascularEvap} + \text{ProportionEvaporationUpper} + \text{LiquidtoUpperEpidermis} + \text{ProportionEvaporationLower} (* \text{Check}=1 *)$$

Out[510]= 1.

## Plots

## Lower Potential

$$\text{In}[511]= \text{psiL} = \psi l [x] /. \text{sol} /. x \rightarrow \text{LX}$$

$$\text{Out}[511]= -0.230212 - 0.603134 X + 0.132802 \left( -X + \frac{X^2}{2} \right)$$

$$\text{In}[512]= \text{Plot}[\text{psiL}, \{X, 0, 1\}]$$

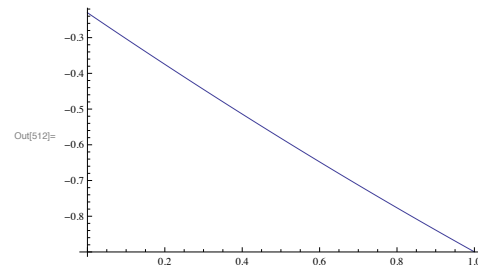

## Upper Potential

$$\text{In}[513]= \text{psiU} = \psi U [x] /. \text{sol} /. x \rightarrow \text{LX}$$

$$\text{Out}[513]= -0.230212 - 0.183485 X + 0.0726306 \left( -X + \frac{X^2}{2} \right)$$

$$\text{In}[514]= \text{Plot}[\text{psiU}, \{X, 0, 1\}]$$

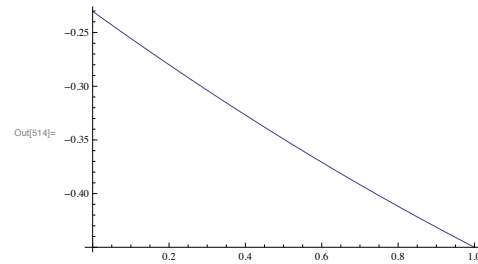

## Lower Thermal

```
In[515]= thetaL =  $\theta_l[x]$  /. sol /. x  $\rightarrow$  LX
```

```
Out[515]=  $298.516 - 0.12308 X + 0.0334171 \left( X - \frac{X^2}{2} \right)$ 
```

```
In[516]= Plot[thetaL, {X, 0, 1}]
```

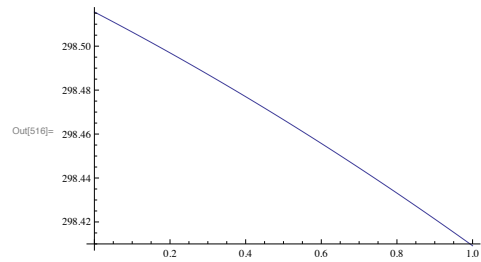

## Upper Thermal

```
In[517]= thetaU =  $\theta_u[x]$  /. sol /. x  $\rightarrow$  LU X
```

```
Out[517]=  $298.516 - 0.0587283 X + 0.158864 \left( X - \frac{X^2}{2} \right)$ 
```

```
In[518]= Plot[thetaU, {X, 0, 1}]
```

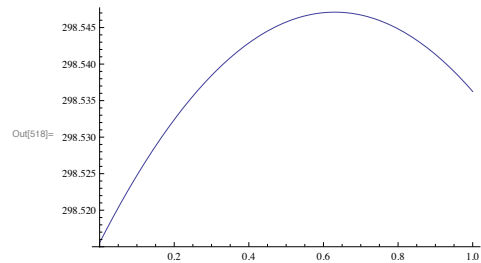

## Upper Vapor Concentration

```
In[519]= cU = c[psi, theta] /. psi  $\rightarrow$  psiU /. theta  $\rightarrow$  thetaU;
```

```
In[520]= Plot[cU, {X, 0, 1}]
```

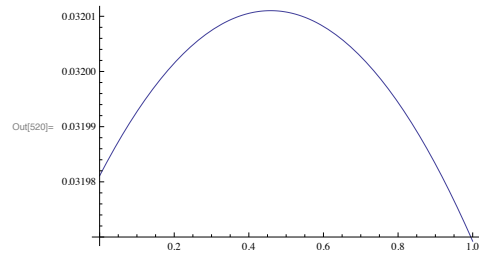

## Lower Vapor Concentration

```
In[521]= cL = c[psi, theta] /. psi  $\rightarrow$  psiL /. theta  $\rightarrow$  thetaL;
```

```
In[522]= Plot[cL, {X, 0, 1}]
```

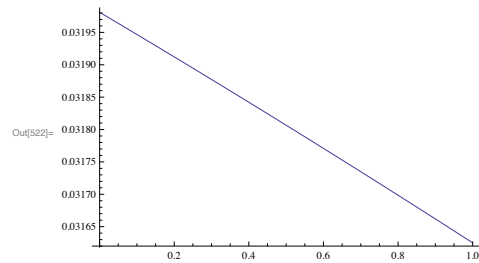

## Whole leaf vapor

```
In[523]= Show[Plot[cU /. X  $\rightarrow$  -z, {z, 0, -1}], Plot[cL, {X, 0, 1}], PlotRange  $\rightarrow$  All]
```

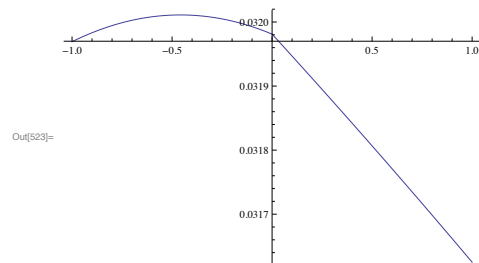



## Whole leaf temperature

```
In[524]:= Show[Plot[thetaU /. X -> -z, {z, 0, -1}], Plot[thetaL, {X, 0, 1}], PlotRange -> All]
```

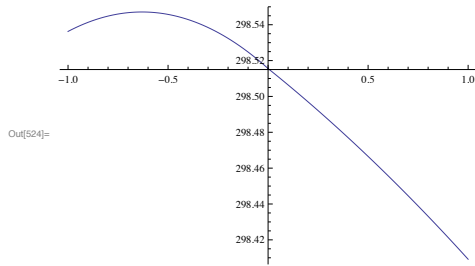

## Whole leaf potential

```
In[525]:= Show[Plot[psiU /. X -> -z, {z, 0, -1}], Plot[psiL, {X, 0, 1}],
ListPlot[{{0, psi}, {0, psi /. sol}}, Joined -> True],
AxesOrigin -> {-1.1, psi /. sol}, PlotRange -> All]
```

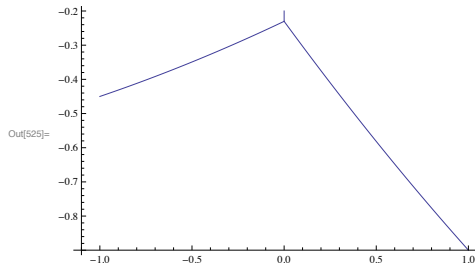

## Export plot data

```
In[526]:= position = Range[-1, 1, .01];
```

```
In[527]:= outpos = Table[0, {Length[position]}];
```

```
In[528]:= potential = Table[0, {Length[position]}];
vapor = Table[0, {Length[position]}];
temperature = Table[0, {Length[position]}];
```

```
Do[
  If[ NonNegative[position[[i]]], potential[[i]] = psiL /. X -> position[[i]],
    potential[[i]] = psiU /. X -> -position[[i]]],
  {i, Length[position]}]
Do[
  If[ NonNegative[position[[i]]],
    vapor[[i]] = cL /. X -> position[[i]], vapor[[i]] = cU /. X -> -position[[i]]],
  {i, Length[position]}]
Do[
  If[ NonNegative[position[[i]]], temperature[[i]] = thetaL /. X -> position[[i]],
    temperature[[i]] = thetaU /. X -> -position[[i]]],
  {i, Length[position]}]
Do[
  If[ NonNegative[position[[i]]],
    outpos[[i]] = L * position[[i]], outpos[[i]] = LU * position[[i]]],
  {i, Length[position]}]
```

```
In[529]:= opdata = Transpose[{outpos, potential}];
```

```
In[530]:= otdata = Transpose[{outpos, temperature}];
```

```
In[531]:= ocdata = Transpose[{outpos, vapor}];
```

```
In[532]:= ListPlot[opdata, Joined -> True]
```

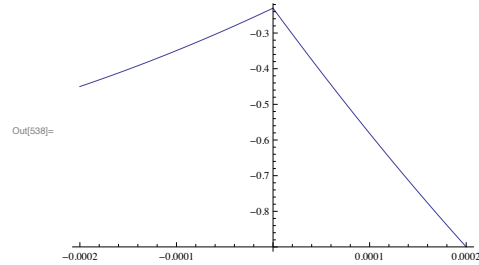

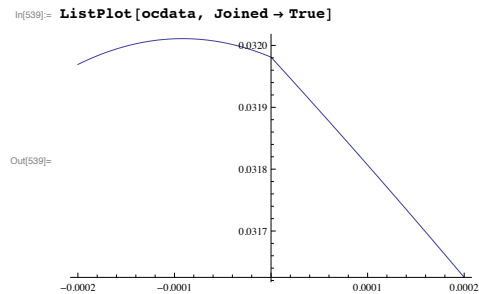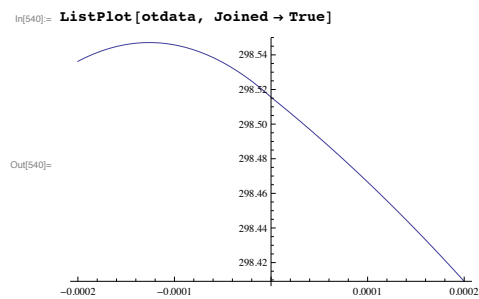

```
In[541]:= SetDirectory[ToFileName[NotebookDirectory[]]];
In[542]:= (*outfile="sunflower_160_".*)
In[543]:= (*Export[outfile<>"potential.xls",opdata]*)
In[544]:= (*Export[outfile<>"vapor.xls",ocdata]*)
In[545]:= (*Export[outfile<>"temperature.xls",otdata]*)
```

## Full mirror illumination of a leaf in gas exchange cuvette

```
In[546]:= Remove["Global`*"]
```

### Temperature

```
In[547]:=  $\theta_{\text{airbase}} = 273.15 + 25$ 
(* air temp preserves true mol fraction if change air temp in cuvette*)
Out[547]= 298.15

In[548]:=  $\theta_{\text{air}} = 273.15 + 25 - .4$  (* air temp actual after temp corr *)
Out[548]= 297.75
```

```
In[549]:=  $\theta_{\text{sur}} = \theta_{\text{air}}$ ; (* for cuvettes *)
```

### Soil dependance of $\psi_r$

```
In[550]:=  $\psi_s = -.2$ ; (* stem potential from cov'd leaf in mpa *)
In[551]:=  $\psi_r = \psi_s$ ;
```

### Other Environmental parameters

```
In[552]:=  $R = 8.3145$ ; (*gas constant Joules per mole per Kelvin*)
In[553]:=  $\text{Patm} = 1.013 \times 10^5$ ; (*atm pressure in Pa*)
In[554]:=  $\chi_a[\text{rh}_-, \theta_-] := \text{rh} \left( 1.28 \frac{R 298.15}{\text{Patm}} \text{Exp} \left[ -\frac{44000}{R} \left( \frac{1}{\theta} - \frac{1}{298.15} \right) \right] \right)$ 
In[555]:=  $\text{RH} = .835$ ;
In[556]:=  $\chi_{\text{air}} = \chi_a[\text{RH}, \theta_{\text{airbase}}]$ ; (* chamber mol fraction *)
In[557]:=  $\chi_{\text{sat}} = \chi_a[1, \theta_{\text{airbase}}]$ ; (* chamber mol fraction *)
In[558]:=  $\text{SRsun} = 200$ ;
```

### Physical quantities

```
In[559]:=  $P_o = 1.28 R 298.15 \times 10^{-6}$  (* ref vapor pressure MPa *)
Out[559]= 0.00317308

In[560]:=  $P_a = \text{Patm} \times 10^{-6}$  (* atm pressure in MPa*)
Out[560]= 0.1013
```

```

In[561]:= c[ψ-, θ-] := 1.28  $\frac{R 298.15}{Patm}$  Exp[- $\frac{44\,000}{R} \left(\frac{1}{\theta} - \frac{1}{298.15}\right)$ ]
      Exp[- $\frac{(\psi + Pa - Po) 18.07}{R \theta}$ ] (*mol fraction for psi in MPa*)

In[562]:= Cvθ = ∂θ c[ψvar, θ] /. θ → θvar (* linearization of dχ/dT 1/k *)
Cvψ = ∂ψ c[ψ, θvar] /. ψ → ψvar (* linearization of dχ/dpsi 1/mpa *)

Out[562]= 0.0313236 e-5291.96 (-0.00335402 +  $\frac{1}{\theta var}$ ) +  $\frac{2.17331 (0.0981269 + \psi var)}{\theta var}$   $\left(\frac{5291.96}{\theta var^2} - \frac{2.17331 (0.0981269 + \psi var)}{\theta var^2}\right)$ 

Out[563]=  $\frac{0.0680759 e^{-5291.96 \left(-0.00335402 + \frac{1}{\theta var}\right) + \frac{2.17331 (0.0981269 + \psi var)}{\theta var}}}{\theta var}$ 

In[564]:= λ = 44 000 - 43 (θvar - 298.15) (* Joules per Mol*)
Out[564]= 44 000 - 43 (-298.15 + θvar)

In[565]:= Dv =  $\frac{Patm}{R \theta var} 2.13 * \left(\frac{\theta var}{273.15}\right)^{1.8} * 10^{(-5)}$ ;
      (* cDv for mol frac drving force out of leaf *)

In[566]:= kvh = .026; (* heat cond air J m-2 s-1 K-1*)

In[567]:= σ = 5.670373 * 10(-8); (*stefan boltzmann J/m2/s/kelvin-4 *)

In[568]:= F = 1; (*view factor radiative from leaf*)

```

### Leaf parameters

```

In[569]:= e1 = 0.96 (* emissivity leaf *)
Out[569]= 0.96

In[570]:= α1 = e1 (* long wave abs leaf *)
Out[570]= 0.96

In[571]:= A1 = .2;
Av = 1 - A1;

In[573]:= AU1 = .8;
AUv = 1 - AU1;

In[575]:= L = 200 × 10(-6); (*-20 10(-6) *)
In[576]:= LU = 200 × 10(-6);

Check whole leaf air fraction

In[577]:=  $\frac{L Av + LU AUv}{L + LU}$  (*vol weighted area fractions *)
Out[577]= 0.5

In[578]:= kih = .2; (* heat cond tissue*)

```

```

In[579]:= kl = 1 × 10(-6); (* hyd cond tissue *)
In[580]:= HA = (0.1); (*mol/m2/s/MPa *)

```

### Absorbed radiation

```

In[581]:= Q = 0.1 * SRsun / L; (* w m-3 volumetric heat source,
      .2 is fraction of total abs solar rad abs in spongy *)
In[582]:= QU = 0.9 * SRsun / LU;
      900 000.

```

### Description of fluxes and relations to env parameters

```

In[583]:= gbl =  $\frac{2.13 * \left(\frac{\theta air}{273.15}\right)^{1.8} * 10^{(-5)} Patm}{R \theta air}$ ; (* c(tair)*Dv(Tair),
      boundary layer molar conductivity *)

In[584]:= δ =  $\left(\frac{2.13 * \left(\frac{\theta air}{273.15}\right)^{1.8} * 10^{(-5)} Patm}{R \theta air}\right) / 1.42$ ;

In[585]:= gbl / δ
Out[585]= 1.42

In[586]:= (*delta is from licor 1.42 mol/m2/s g_bw, d=Dv*C_a/g_bw, C_a=40.49 mol/m3*)

In[587]:= qsl =  $\frac{kvh}{\delta} (\theta le - \theta air)$ ;

In[588]:= qsu =  $\frac{kvh}{\delta} (\theta ue - \theta air)$ ;

In[589]:= qrl = σ e1 θle4 - F α1 (σ θsur4);
In[590]:= qru = σ e1 θue4 - F α1 (σ θsur4);

In[591]:= χ[ψ-, θ-] := 1.28  $\frac{R 298.15}{Patm}$  Exp[- $\frac{44\,000}{R} \left(\frac{1}{\theta} - \frac{1}{298.15}\right)$ ] Exp[- $\frac{(\psi + Pa - Po) 18.07}{R \theta}$ ]
      (*for psi in MPa*)

In[592]:= χe = χ[ψle, θle];
In[593]:= χue = χ[ψue, θue];

In[594]:= Jtran =  $\left(\frac{1}{gs} + \frac{\delta}{gbl}\right)^{-1} (\chi e - \chi air)$ ;
In[595]:= UJtran =  $\left(\frac{1}{gsu} + \frac{\delta}{gbl}\right)^{-1} (\chi ue - \chi air)$ ;

```

```
In[588]=  $\psi_0 = \psi_r - (J_{\text{tr}} + U_{\text{Jtr}}) / HA;$ 
```

### Stomatal set points

```
In[587]=  $\text{stomalow}[\text{ps}_-] := 0.5363540283333067 + (\text{ps} + .9) .6 (* \text{gs max } 1.2 *)$ 
```

```
In[588]=  $\text{stomaup}[\text{psu}_-] := 0.17186009317252962 + (\text{psu} + 0.45) .6$ 
```

### Initial values

```
In[589]=  $\psi_{\text{rinit}} = -.9;$ 
```

```
In[600]=  $\psi_{\text{rinitup}} = -.45;$ 
```

```
In[601]=  $\theta_{\text{var}} = \theta_{\text{air}}; (* \theta_{\text{air}} *)$   
 $\psi_{\text{var}} = \psi_{\text{rinit}}; (* \psi_r *)$ 
```

### First iteration

```
In[603]=  $\Pi\psi = 1 + \frac{Al\ klh + Av\ kvh}{\lambda\ Av\ Dv\ Cv\theta} + \frac{Al\ klh + Av\ kvh\ Cv\psi}{\lambda\ Al\ kl\ Cv\theta} (* \text{greater than one favors conduction over latent} *)$ 
```

```
Out[603]= 2.77846
```

```
In[604]=  $\Pi\theta = 1 + \frac{\lambda\ Al\ kl}{Al\ klh + Av\ kvh} \frac{Av\ Dv\ Cv\theta}{Al\ kl + Av\ Dv\ Cv\psi} (* \text{greater than one favors latent over conduction} *)$ 
```

```
Out[604]= 1.56228
```

```
In[605]=  $\Pi U\psi = 1 + \frac{AUl\ klh + AUv\ kvh}{\lambda\ AUv\ Dv\ Cv\theta} + \frac{AUl\ klh + AUv\ kvh\ Cv\psi}{\lambda\ AUl\ kl\ Cv\theta} (* \text{greater than one favors conduction over latent} *)$ 
```

```
Out[605]= 11.727
```

```
In[606]=  $\Pi U\theta = 1 + \frac{\lambda\ AUl\ kl}{AUl\ klh + AUv\ kvh} \frac{AUv\ Dv\ Cv\theta}{AUl\ kl + AUv\ Dv\ Cv\psi} (* \text{greater than one favors latent over conduction} *)$ 
```

```
Out[606]= 1.09322
```

### Global energy conservation

```
In[607]=  $SR_{\text{sun}} == \text{qsu} + \text{qru} + \text{qrl} + \text{qsl} + \lambda J_{\text{tr}} + \lambda U_{\text{Jtr}};$ 
```

### Solution lower thermal field

```
In[608]=  $\theta_1[x_-] := \theta_0 + \left( -\frac{x^2}{2L^2} + \frac{x}{L} \right) \frac{QL^2}{\Pi\theta (Al\ klh + Av\ kvh)} + \left( -\frac{(\text{qsl} + \text{qrl})L}{\Pi\theta (Al\ klh + Av\ kvh)} - \frac{\lambda Al\ kl J_{\text{tr}}L}{\Pi\theta (Al\ klh + Av\ kvh)} \frac{1}{(Al\ kl + Av\ Dv\ Cv\psi)} \right) \frac{x}{L}$ 
```

### Solution upper thermal field

```
In[609]=  $\theta U[x_-] := \theta_0 + \left( -\frac{x^2}{2LU^2} + \frac{x}{LU} \right) \frac{QU LU^2}{\Pi U\theta (AUl\ klh + AUv\ kvh)} + \left( -\frac{(\text{qsu} + \text{qru})LU}{\Pi U\theta (AUl\ klh + AUv\ kvh)} - \frac{\lambda AUl\ kl U_{\text{Jtr}}LU}{\Pi U\theta (AUl\ klh + AUv\ kvh)} \frac{1}{(AUl\ kl + AUv\ Dv\ Cv\psi)} \right) \frac{x}{LU}$ 
```

### Solution upper potential field

```
In[610]=  $\psi U[x_-] := \psi_0 + \left( \frac{x^2}{2LU^2} - \frac{x}{LU} \right) \frac{QU LU^2}{\Pi U\psi AUl\ kl\lambda} + \left( \frac{(\text{qsu} + \text{qru})LU}{\Pi U\psi AUl\ kl\lambda} - \frac{U_{\text{Jtr}}LU}{\Pi U\psi AUl\ kl\lambda} \frac{AUl\ klh + AUv\ kvh}{AUv\ Dv\ Cv\theta} \right) \frac{x}{LU}$ 
```

### Solution lower potential field

```
In[611]=  $\psi_1[x_-] := \psi_0 + \left( \frac{x^2}{2L^2} - \frac{x}{L} \right) \frac{QL^2}{\Pi\psi Al\ kl\lambda} + \left( \frac{(\text{qsl} + \text{qrl})L}{\Pi\psi Al\ kl\lambda} - \frac{J_{\text{tr}}L}{\Pi\psi Al\ kl\lambda} \frac{Al\ klh + Av\ kvh}{Av\ Dv\ Cv\theta} \right) \frac{x}{L}$ 
```

### Solve system

```
In[612]=  $\text{sol} = \text{FindRoot} \left[ \left\{ \frac{\theta U[LU]}{\theta_{ue}} == 1, \frac{\theta_1[L]}{\theta_{le}} == 1, SR_{\text{sun}} == \text{qsu} + \text{qru} + \text{qrl} + \text{qsl} + \lambda J_{\text{tr}} + \lambda U_{\text{Jtr}}, \frac{\psi_1[L]}{\psi_{le}} == 1, \frac{\psi U[LU]}{\psi_{ue}} == 1, \frac{\text{stomalow}[\psi_{le}]}{\text{gs}} == 1, \frac{\text{stomaup}[\psi_{ue}]}{\text{gsu}} == 1 \right\}, \left\{ \{\theta_0, \theta_{\text{air}}\}, \{\theta_{ue}, \theta_{\text{air}}\}, \{\theta_{le}, \theta_{\text{air}}\}, \{\psi_{le}, \psi_{\text{rinit}}\}, \{\psi_{ue}, \psi_{\text{rinitup}}\}, \{\text{gs}, .3\}, \{\text{gsu}, .3\} \right\}, \text{PrecisionGoal} \rightarrow 4 \right]$ 
```

```
Out[612]=  $\{\theta_0 \rightarrow 298.552, \theta_{ue} \rightarrow 298.572, \theta_{le} \rightarrow 298.406, \psi_{le} \rightarrow -0.839312, \psi_{ue} \rightarrow -0.452081, \text{gs} \rightarrow 0.572767, \text{gsu} \rightarrow 0.170612\}$ 
```

### update seed values

```
In[613]=  $\theta_{\text{var}} = \theta_0 /. \text{sol}$   
 $\psi_{\text{var}} = \psi_0 /. \text{sol}$ 
```

```
Out[613]= 298.552
```

```
Out[614]= -0.231317
```

## Second iteration

```
In[615]= Cvθ = ∂θ c[ψvar, θ] /. θ → θvar (* linearization of dχ/dT 1/k *)
Cvψ = ∂ψ c[ψ, θvar] /. ψ → ψvar (* linearization of dχ/dpsi 1/mpa *)
Out[615]= 0.00190297
Out[616]= 0.00023331

In[617]= Πψ = 1 +  $\frac{A1\ klh + Av\ kvh}{\lambda\ Av\ Dv\ Cv\theta}$  +
 $\frac{A1\ klh + Av\ kvh}{\lambda\ A1\ kl}$   $\frac{Cv\psi}{Cv\theta}$  (* greater than one favors conduction over latent *)
Out[617]= 2.73754

In[618]= Πθ = 1 +  $\frac{\lambda\ A1\ kl}{A1\ klh + Av\ kvh}$   $\frac{Av\ Dv\ Cv\theta}{A1\ kl + Av\ Dv\ Cv\psi}$ 
(* greater than one favors latent over conduction *)
Out[618]= 1.57553

In[619]= ΠUψ = 1 +  $\frac{AU1\ klh + AUv\ kvh}{\lambda\ AUv\ Dv\ Cv\theta}$  +
 $\frac{AU1\ klh + AUv\ kvh}{\lambda\ AU1\ kl}$   $\frac{Cv\psi}{Cv\theta}$  (* greater than one favors conduction over latent *)
Out[619]= 11.2499

In[620]= ΠUθ = 1 +  $\frac{\lambda\ AU1\ kl}{AU1\ klh + AUv\ kvh}$   $\frac{AUv\ Dv\ Cv\theta}{AU1\ kl + AUv\ Dv\ Cv\psi}$ 
(* greater than one favors latent over conduction *)
Out[620]= 1.09756

In[621]= sol = FindRoot[ $\left\{\frac{\theta U[LU]}{\theta ue} = 1, \frac{\theta l[L]}{\theta le} = 1, SRsun == qsu + qru + qrl + qsl + \lambda Jtran + \lambda UJtran,$ 
 $\frac{\psi l[L]}{\psi le} = 1, \frac{\psi U[LU]}{\psi ue} = 1, \frac{stomalow[\psi le]}{gs} = 1, \frac{stomaup[\psi ue]}{gsu} = 1\right\},$ 
{{θo, θair}, {θue, θair}, {θle, θair}, {ψle, ψrinit},
{ψue, ψrinitup}, {gs, .3}, {gsu, .3}}, PrecisionGoal → 4]
Out[621]= {θo → 298.541, θue → 298.561, θle → 298.398,
ψle → -0.822721, ψue → -0.451833, gs → 0.582721, gsu → 0.17076}
```

## update seed values

```
In[622]= θvar = θo /. sol
ψvar = ψo /. sol
Out[622]= 298.541
Out[623]= -0.231522
```

## Third iteration

```
In[624]= Cvθ = ∂θ c[ψvar, θ] /. θ → θvar (* linearization of dχ/dT 1/k *)
Cvψ = ∂ψ c[ψ, θvar] /. ψ → ψvar (* linearization of dχ/dpsi 1/mpa *)
Out[624]= 0.00190181
Out[625]= 0.000233159

In[626]= Πψ = 1 +  $\frac{A1\ klh + Av\ kvh}{\lambda\ Av\ Dv\ Cv\theta}$  +
 $\frac{A1\ klh + Av\ kvh}{\lambda\ A1\ kl}$   $\frac{Cv\psi}{Cv\theta}$  (* greater than one favors conduction over latent *)
Out[626]= 2.73806

In[627]= Πθ = 1 +  $\frac{\lambda\ A1\ kl}{A1\ klh + Av\ kvh}$   $\frac{Av\ Dv\ Cv\theta}{A1\ kl + Av\ Dv\ Cv\psi}$ 
(* greater than one favors latent over conduction *)
Out[627]= 1.57536

In[628]= ΠUψ = 1 +  $\frac{AU1\ klh + AUv\ kvh}{\lambda\ AUv\ Dv\ Cv\theta}$  +
 $\frac{AU1\ klh + AUv\ kvh}{\lambda\ AU1\ kl}$   $\frac{Cv\psi}{Cv\theta}$  (* greater than one favors conduction over latent *)
Out[628]= 11.256

In[629]= ΠUθ = 1 +  $\frac{\lambda\ AU1\ kl}{AU1\ klh + AUv\ kvh}$   $\frac{AUv\ Dv\ Cv\theta}{AU1\ kl + AUv\ Dv\ Cv\psi}$ 
(* greater than one favors latent over conduction *)
Out[629]= 1.0975

In[630]= sol = FindRoot[ $\left\{\frac{\theta U[LU]}{\theta ue} = 1, \frac{\theta l[L]}{\theta le} = 1, SRsun == qsu + qru + qrl + qsl + \lambda Jtran + \lambda UJtran,$ 
 $\frac{\psi l[L]}{\psi le} = 1, \frac{\psi U[LU]}{\psi ue} = 1, \frac{stomalow[\psi le]}{gs} = 1, \frac{stomaup[\psi ue]}{gsu} = 1\right\},$ 
{{θo, θair}, {θue, θair}, {θle, θair}, {ψle, ψrinit},
{ψue, ψrinitup}, {gs, .3}, {gsu, .3}}, PrecisionGoal → 4]
Out[630]= {θo → 298.541, θue → 298.561, θle → 298.398,
ψle → -0.822938, ψue → -0.451836, gs → 0.582591, gsu → 0.170758}
```

## update seed values

```
In[631]= θvar = θo /. sol
ψvar = ψo /. sol
Out[631]= 298.541
Out[632]= -0.23152
```

## Fourth iteration

In[633]=  $Cv\theta = \partial_{\theta} c[\psivar, \theta] /. \theta \rightarrow \thetavar$  (\* linearization of  $d\chi/dT$  1/k \*)  
 $Cv\psi = \partial_{\psi} c[\psi, \thetavar] /. \psi \rightarrow \psivar$  (\* linearization of  $d\chi/dpsi$  1/mpa \*)

Out[633]= 0.00190182

Out[634]= 0.000233161

In[635]= 
$$\Pi\psi = 1 + \frac{Al\ klh + Av\ kvh}{\lambda\ Av\ Dv\ Cv\theta} + \frac{Al\ klh + Av\ kvh}{\lambda\ Al\ kl} \frac{Cv\psi}{Cv\theta}$$
 (\* greater than one favors conduction over latent \*)

Out[635]= 2.73805

In[636]= 
$$\frac{Al\ klh + Av\ kvh}{\lambda\ Av\ Dv\ Cv\theta}$$

Out[636]= 0.890682

In[637]= 
$$\frac{Al\ klh + Av\ kvh}{\lambda\ Al\ kl} \frac{Cv\psi}{Cv\theta}$$

Out[637]= 0.847368

In[638]= 
$$\frac{Cv\psi}{Cv\theta}$$

Out[638]= 0.122599

In[639]= 
$$\Pi\theta = 1 + \frac{\lambda\ Al\ kl}{Al\ klh + Av\ kvh} \frac{Av\ Dv\ Cv\theta}{Al\ kl + Av\ Dv\ Cv\psi}$$
 (\* greater than one favors latent over conduction \*)

Out[639]= 1.57536

In[640]= 
$$\Pi U\psi = 1 + \frac{AU1\ klh + AUv\ kvh}{\lambda\ AUv\ Dv\ Cv\theta} + \frac{AU1\ klh + AUv\ kvh}{\lambda\ AU1\ kl} \frac{Cv\psi}{Cv\theta}$$
 (\* greater than one favors conduction over latent \*)

Out[640]= 11.2559

In[641]= 
$$\Pi U\theta = 1 + \frac{\lambda\ AU1\ kl}{AU1\ klh + AUv\ kvh} \frac{AUv\ Dv\ Cv\theta}{AU1\ kl + AUv\ Dv\ Cv\psi}$$
 (\* greater than one favors latent over conduction \*)

Out[641]= 1.0975

In[642]= 
$$\text{sol} = \text{FindRoot}\left[\left\{\frac{\theta U[L U]}{\theta ue} = 1, \frac{\theta l[L]}{\theta le} = 1, \text{SRsun} == \text{qsu} + \text{qru} + \text{qrl} + \text{qsl} + \lambda\ J\text{tran} + \lambda\ U\text{Jtran}, \frac{\psi l[L]}{\psi le} = 1, \frac{\psi U[L U]}{\psi ue} = 1, \frac{\text{stomalow}[\psi le]}{\text{gs}} = 1, \frac{\text{stomaup}[\psi ue]}{\text{gsu}} = 1\right\}, \left\{\{\theta o, \theta air\}, \{\theta ue, \theta air\}, \{\theta le, \theta air\}, \{\psi le, \psi rinit\}, \{\psi ue, \psi rinitup\}, \{\text{gs}, .3\}, \{\text{gsu}, .3\}\right\}, \text{PrecisionGoal} \rightarrow 4\right]$$

Out[642]=  $\{\theta o \rightarrow 298.541, \theta ue \rightarrow 298.561, \theta le \rightarrow 298.398, \psi le \rightarrow -0.822936, \psi ue \rightarrow -0.451836, \text{gs} \rightarrow 0.582593, \text{gsu} \rightarrow 0.170758\}$

## check convergence

In[643]=  $\thetavar - \theta o /. \text{sol}$

Out[643]=  $1.92132 \times 10^{-6}$

In[644]=  $\psivar - \psi o /. \text{sol}$

Out[644]=  $3.44654 \times 10^{-8}$

## Results

In[645]=  $\text{MolFrac} = \{(\chi e - \chi air), (\chi ue - \chi air), \chi e, \chi ue, \chi air\} /. \text{sol}$  (\* target at Q160 is .0054 \*)

Out[645]=  $\{0.00546716, 0.0058614, 0.0316224, 0.0320166, 0.0261552\}$

In[646]=  $\text{Temps} = \{\theta air, \theta sur, \theta ue, \theta o, \theta le, \theta le - \theta air\} /. \text{sol}$

Out[646]=  $\{297.75, 297.75, 298.561, 298.541, 298.398, 0.648344\}$

In[647]=  $\text{Potentials} = \{\psi r, \psi o, \psi ue, \psi le\} /. \text{sol}$

Out[647]=  $\{-0.2, -0.23152, -0.451836, -0.822936\}$

In[648]=  $\text{gs} /. \text{sol}$  (\* target at Q160 is .7 \*)

Out[648]= 0.582593

In[649]=  $\text{gsu} /. \text{sol}$

Out[649]= 0.170758

In[650]=  $\text{totalgs} = \text{gs} + \text{gsu} /. \text{sol}$

Out[650]= 0.753351

## Fluxes

In[651]=  $\text{qsu} /. \text{sol}$  (\*Sensible flux upper\*)

Out[651]= 29.4297

```

In[662]:= qru /. sol (*Radiative flux upper*)
Out[662]= 4.68284

In[663]:= qsl /. sol (*Sensible flux lower*)
Out[663]= 23.5155

In[664]:= qrl /. sol (*Radiative flux lower*)
Out[664]= 3.73871

In[665]:= latentlow = λ Jtrun /. sol
Out[665]= 99.3367

In[666]:= latentup = λ UJtrun /. sol
Out[666]= 39.2965

In[667]:= totallatent = latentlow + latentup
Out[667]= 138.633

In[668]:= tranlow = Jtrun /. sol (* target at Q160 is .003 *)
Out[668]= 0.00225851

In[669]:= tranup = UJtrun /. sol
Out[669]= 0.000893443

In[670]:= totaltran = tranlow + tranup
Out[670]= 0.00315196

```

### Matching Q160

```

In[661]:= totaltran (* expect about .0031 *)
Out[661]= 0.00315196

In[662]:= blMFdrop = totaltran / 2.84
Out[662]= 0.00110984

In[663]:= χsurf = χair + blMFdrop (* app mol frac at leaf surface *)
Out[663]= 0.027265

In[664]:= appgradientLS = χe - χsurf /. sol (* app MF grad at leaf surf exp .0044 *)
Out[664]= 0.00435732

In[665]:= appgst =  $\left( \frac{(\chi_e - \chi_{air})}{totaltran} - \frac{1}{2.84} \right)^{-1}$  /. sol (* 0.7 *)
Out[665]= 0.723371

```

### Evaporation distribution percent of totals

```

In[666]:= Liquidtolower =  $\frac{-A1 \ k1 \ \partial_x \ \psi1[x] /. x \rightarrow L}{Jtrun + UJtrun}$  /. sol
Out[666]= 0.16129

In[667]:= Liquidtoup =  $\frac{-AU1 \ k1 \ \partial_x \ \psi U[x] /. x \rightarrow LU}{Jtrun + UJtrun}$  /. sol
Out[667]= 0.221918

In[668]:= VaportoLower =  $\frac{(-Av \ Dv \ Cv \ \psi (\partial_x \ \psi1[x] /. x \rightarrow L) - Av \ Dv \ Cv \ \theta (\partial_x \ \theta1[x] /. x \rightarrow L)) / (Jtrun + UJtrun)}{sol}$ 
Out[668]= 0.555253

In[669]:= VaportoUpper =  $\frac{(-AUv \ Dv \ Cv \ \psi (\partial_x \ \psi U[x] /. x \rightarrow LU) - AUv \ Dv \ Cv \ \theta (\partial_x \ \theta U[x] /. x \rightarrow LU)) / (Jtrun + UJtrun)}{sol}$ 
Out[669]= 0.061539

In[670]:= (Liquidtolower + Liquidtoup + VaportoLower + VaportoUpper)
Out[670]= 1.

```

### Condensation on lower epidermis if following is larger than one:

```

In[671]:=  $\frac{(qsl + qrl)}{Jtrun \ \lambda} \frac{\lambda \ Av \ Dv \ Cv \ \theta}{Al \ klh + Av \ kvh}$  /. sol
Out[671]= 0.308036

```

### Condensation on upper epidermis if following is larger than one:

```

In[672]:=  $\frac{(qsu + qru)}{UJtrun \ \lambda} \frac{\lambda \ AUv \ Dv \ Cv \ \theta}{AU1 \ klh + AUv \ kvh}$  /. sol
Out[672]= 0.0896749

```

### Leaf water potential and apparent conductance

```

In[673]:= LowerAvgPotential =  $\frac{1}{L} \int_0^L \psi1[x] \ dx$  /. sol
Out[673]= -0.541067

In[674]:= UpperAvgPotential =  $\frac{1}{LU} \int_0^{LU} \psi U[x] \ dx$  /. sol
Out[674]= -0.349253

```

$$\text{In}[675]: \text{LWP} = \frac{\text{L LowerAvgPotential} + \text{LU UpperAvgPotential}}{\text{L} + \text{LU}}$$

Out[675]: -0.44516

### Naive view of gradients

$$\text{In}[676]: \text{Kleaf} = \frac{\text{Jtran}}{\psi_r - \text{LWP}} /. \text{sol} \quad (* \text{ Apparent conductance, mol m}^{-2} \text{ s}^{-1} \text{ MPa}^{-1} *)$$

Out[676]: 0.00921241

### Analysis

#### Analyze proportion peristomatal at Lower Epidermis

$$\text{In}[677]: \text{ProportionPeristomatal} = \frac{-\text{Al kl } \partial_x \psi_l[x] /. \text{x} \rightarrow \text{L}}{\text{Jtran} + \text{UJtran}} /. \text{sol}$$

Out[677]: 0.16129

$$\text{In}[678]: \text{PropPeri} = \frac{-(\text{qsl} + \text{qrl})}{\Pi \psi \text{Jtran} \lambda} + \left( 1 + \frac{\lambda \text{Av Dv Cv}\theta}{\text{Al klh} + \text{Av kvh}} + \frac{\text{Av Dv Cv}\psi}{\text{Al kl}} \right)^{-1} /. \text{sol}$$

Out[678]: 0.225094

$$\text{In}[679]: \frac{-(\text{qsl} + \text{qrl})}{\Pi \psi \text{Jtran} \lambda} /. \text{sol}$$

Out[679]: -0.100204

$$\text{In}[680]: \left( 1 + \frac{\lambda \text{Av Dv Cv}\theta}{\text{Al klh} + \text{Av kvh}} + \frac{\text{Av Dv Cv}\psi}{\text{Al kl}} \right)^{-1} /. \text{sol}$$

Out[680]: 0.325298

#### Evaporation in lower

$$\text{In}[681]: \text{ProportionEvaporationLower} = \frac{\text{Al kl } \psi_l''[x] \text{L}}{\text{Jtran} + \text{UJtran}} /. \text{sol}$$

Out[681]: 0.0526892

$$\text{In}[682]: \frac{\text{QL}}{\Pi \psi \lambda \text{Jtran}} /. \text{sol} \quad (* \text{integrating evap 2nd derv over L} *)$$

Out[682]: 0.0735324

#### Analyze evaporation in upper part of leaf

$$\text{In}[683]: \text{ProportionEvaporationUpper} = \frac{\text{AUl kl } \psi_U''[x] \text{LU}}{\text{Jtran} + \text{UJtran}} /. \text{sol}$$

Out[683]: 0.115352

$$\text{In}[684]: \text{VaportoUpperEpidermis} = \frac{(-\text{AUv Dv Cv}\psi (\partial_x \psi_U[x] /. \text{x} \rightarrow \text{LU}) - \text{AUv Dv Cv}\theta (\partial_x \theta_U[x] /. \text{x} \rightarrow \text{LU}))}{(\text{Jtran} + \text{UJtran})} /. \text{sol}$$

Out[684]: 0.061539

$$\text{In}[685]: \text{LiquidtoUpperEpidermis} = \frac{-\text{AUl kl } \partial_x \psi_U[x] /. \text{x} \rightarrow \text{LU}}{\text{Jtran} + \text{UJtran}} /. \text{sol}$$

Out[685]: 0.221918

$$\text{In}[686]: \frac{\lambda}{\text{QU LU}} \frac{1}{1} (-\text{AUv Dv Cv}\psi (\partial_x \psi_U[x] /. \text{x} \rightarrow \text{LU}) - \text{AUv Dv Cv}\theta (\partial_x \theta_U[x] /. \text{x} \rightarrow \text{LU})) /. \text{sol}$$

Out[686]: 0.0473963

$$\text{In}[687]: \frac{\lambda}{\text{qsu} + \text{qru}} \frac{1}{1} (-\text{AUv Dv Cv}\psi (\partial_x \psi_U[x] /. \text{x} \rightarrow \text{LU}) - \text{AUv Dv Cv}\theta (\partial_x \theta_U[x] /. \text{x} \rightarrow \text{LU})) /. \text{sol}$$

Out[687]: 0.250094

$$\text{In}[688]: \text{qru} /. \text{sol}$$

Out[688]: 4.68284

#### Perivascular vapor

$$\text{In}[689]: \text{VaporFluxintoLower} = \frac{(-\text{Av Dv Cv}\psi (\partial_x \psi_l[x] /. \text{x} \rightarrow 0) - \text{Av Dv Cv}\theta (\partial_x \theta_l[x] /. \text{x} \rightarrow 0))}{(\text{Jtran} + \text{UJtran})} /. \text{sol}$$

Out[689]: 0.502564

$$\text{In}[690]: \text{VaporFluxintoUpper} = \frac{(-\text{AUv Dv Cv}\psi (\partial_x \psi_U[x] /. \text{x} \rightarrow 0) - \text{AUv Dv Cv}\theta (\partial_x \theta_U[x] /. \text{x} \rightarrow 0))}{(\text{Jtran} + \text{UJtran})} /. \text{sol}$$

Out[690]: -0.0538129

$$\text{In}[691]: \text{PerivascularEvap} = \text{VaporFluxintoLower} + \text{VaporFluxintoUpper}$$

Out[691]: 0.448751

$$\text{In}[692]: \text{ProportionPeristomatal} + \text{PerivascularEvap} + \text{ProportionEvaporationUpper} + \text{LiquidtoUpperEpidermis} + \text{ProportionEvaporationLower} \quad (* \text{Check}=1 *)$$

Out[692]: 1.



## Plots

### Lower Potential

In[693]= `psiL = psi[x] /. sol /. x -> L X`

Out[693]=  $-0.23152 - 0.508379 X + 0.166074 \left(-X + \frac{X^2}{2}\right)$

In[694]= `Plot[psiL, {X, 0, 1}]`

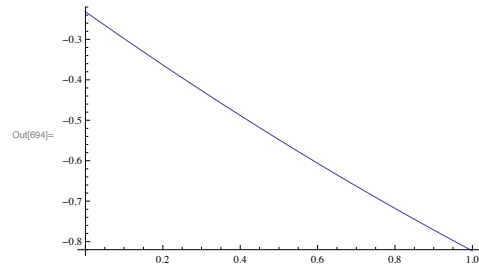

### Upper Potential

In[695]= `psiU = psi[x] /. sol /. x -> LU X`

Out[695]=  $-0.23152 - 0.174869 X + 0.0908961 \left(-X + \frac{X^2}{2}\right)$

In[696]= `Plot[psiU, {X, 0, 1}]`

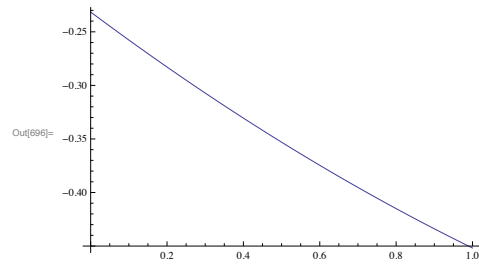

### Lower Thermal

In[697]= `thetaL = theta[x] /. sol /. x -> L X`

Out[697]=  $298.541 - 0.163205 X + 0.0417616 \left(X - \frac{X^2}{2}\right)$

In[698]= `Plot[thetaL, {X, 0, 1}]`

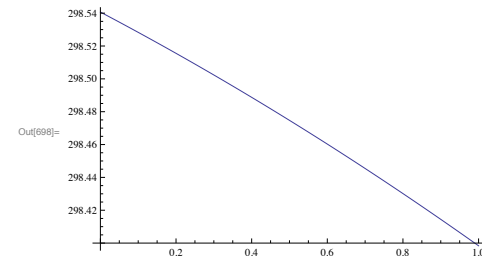

### Upper Thermal

In[699]= `thetaU = theta[x] /. sol /. x -> LU X`

Out[699]=  $298.541 - 0.0785445 X + 0.198557 \left(X - \frac{X^2}{2}\right)$

In[700]= `Plot[thetaU, {X, 0, 1}]`

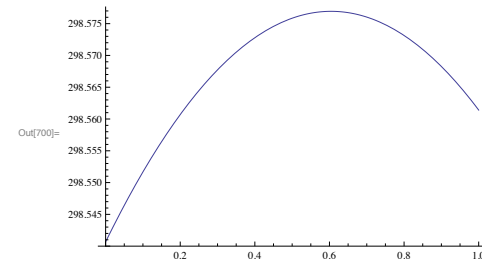

### Upper Vapor Concentration

In[701]= `cU = c[psi, theta] /. psi -> psiU /. theta -> thetaU;`

```
In[702]= Plot[cU, {X, 0, 1}]
```

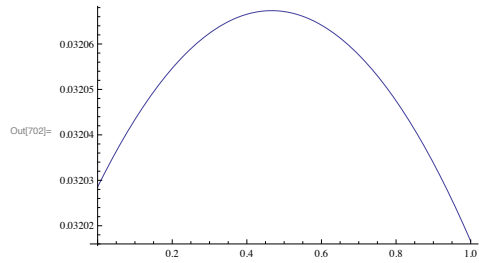

### Lower Vapor Concentration

```
In[703]= cL = c[ψ, θ] /. ψ → psiL /. θ → thetaL;
```

```
In[704]= Plot[cL, {X, 0, 1}]
```

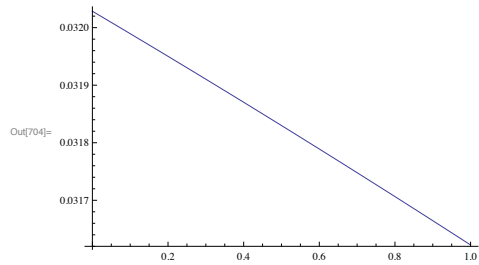

### Whole leaf vapor

```
In[705]= Show[Plot[cU /. X → -z, {z, 0, -1}], Plot[cL, {X, 0, 1}], PlotRange → All]
```

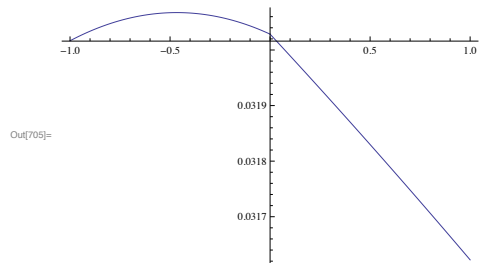

### Whole leaf temperature

```
In[706]= Show[Plot[thetaU /. X → -z, {z, 0, -1}], Plot[thetaL, {X, 0, 1}], PlotRange → All]
```

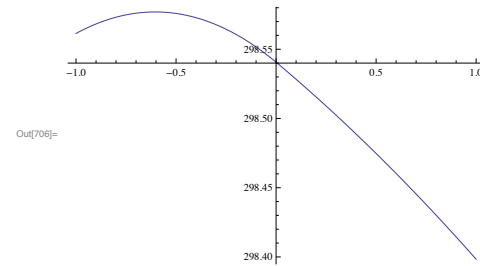

### Whole leaf potential

```
In[707]= Show[Plot[psiU /. X → -z, {z, 0, -1}], Plot[psiL, {X, 0, 1}],  
ListPlot[{{0, ψr}, {0, ψo /. sol}], Joined → True],  
AxesOrigin → {-1.1, ψle /. sol}, PlotRange → All]
```

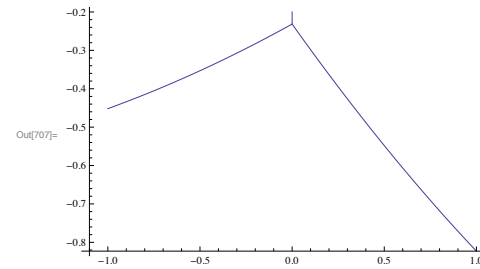

### Export plot data

```
In[708]= position = Range[-1, 1, .01];
```

```
In[709]= outpos = Table[0, {Length[position]}];
```

```

In[710]:= potential = Table[0, {Length[position]};
vapor = Table[0, {Length[position]};
temperature = Table[0, {Length[position]};

Do[
  If[ NonNegative[position[[i]]], potential[[i]] = psiL /. X -> position[[i]],
    potential[[i]] = psiU /. X -> -position[[i]],
    {i, Length[position]}]
Do[
  If[ NonNegative[position[[i]]],
    vapor[[i]] = cL /. X -> position[[i]], vapor[[i]] = cU /. X -> -position[[i]],
    {i, Length[position]}]
Do[
  If[ NonNegative[position[[i]]], temperature[[i]] = thetaL /. X -> position[[i]],
    temperature[[i]] = thetaU /. X -> -position[[i]],
    {i, Length[position]}]
Do[
  If[ NonNegative[position[[i]]],
    outpos[[i]] = L * position[[i]], outpos[[i]] = LU * position[[i]],
    {i, Length[position]}]
In[717]:= opdata = Transpose[{outpos, potential}];
In[718]:= otdata = Transpose[{outpos, temperature}];
In[719]:= ocdata = Transpose[{outpos, vapor}];

```

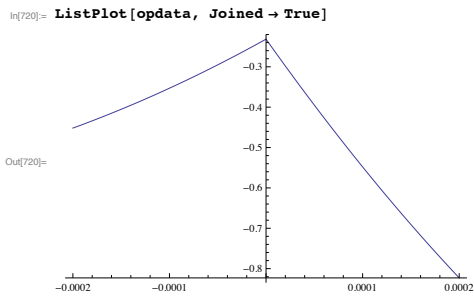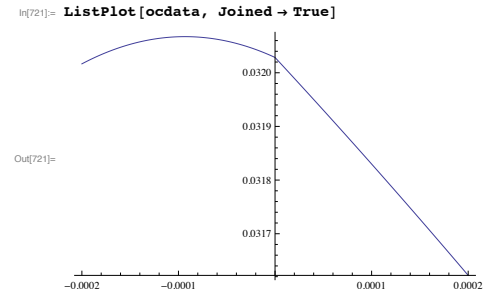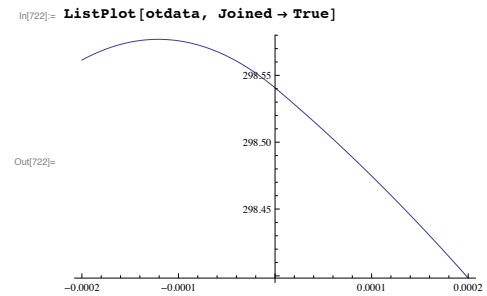

```

In[723]:= (*SetDirectory[ToFileName[NotebookDirectory[]] ]*)
In[724]:= (*outfile="sunflower_200TC_")
In[725]:= (*Export[outfile<>"potential.xls",opdata]*)
In[726]:= (*Export[outfile<>"vapor.xls",ocdata]*)
In[727]:= (*Export[outfile<>"temperature.xls",otdata]*)

```
