# Supplementary material
Source: PubMed Central journal article supplement (PMC3982738)
Supplement: supp_pp.114.236323_236323Supplemental_Text_S6.pdf [file supp_pp.114.236323_236323Supplemental_Text_S6.pdf]

Sample code for sunflower simulations with epidermal potential setpoints  
(vary parameters as necessary)

```
Remove["Global`*"]
```

### Stomatal set points

```
ψle = -.419 (* conserved value based on numerical exposed leaf sol, gs varies *)
-0.419

ψue = -.419
-0.419
```

### Initial values

```
ψrinit = -1.29;

θvar = θair; (* θair *)
ψvar = ψrinit; (* ψr *)
```

### Temperature

```
θairbase = 273.15 + 25
(* air temp preserves true mol fraction if change air temp in cuvette*)
298.15

θair = 273.15 + 25 (* air temp actual after temp corr *)
298.15

θsur = θair; (* for cuvettes *)
```

### Soil dependance of ψ/r

```
ψs = -.2; (* stem potential from cov'd leaf in mpa *)

ψr = ψs
-0.2
```

### Other Environmental parameters

```
R = 8.3145; (* gas constant Joules per mole per Kelvin *)

Patm = 1.013 × 10^5; (* atm pressure in Pa *)
```

```
χa[rh_, θ_] := rh (1.28  $\frac{R 298.15}{Patm}$  Exp[- $\frac{44000}{R} (\frac{1}{\theta} - \frac{1}{298.15})$ ])

RH = .835
0.835

χair = χa[RH, θairbase] (* chamber mol fraction *)
0.0261552

χsat = χa[1, θairbase] (* chamber mol fraction *)
0.0313236

SRsun = 160 (* asr (  $\frac{1}{.45}$  * PARout * 10^(-6) * 2.35 * 10^5 ) (1+r) - AE - FE*)
(* neglect reflectance *)
(* coeff J mol-1,
from Campbell intro env biophysics p 151: Total E incident is about 2x E in PAR,
then typical leaf abs is about half that amount,
so PAR plus NIR about equal to all E in PAR. OR 2.22 = 1/.45 is factor
mult PAR capbell but also could subtract ps E at 479 kj per mol co2,
and then fluorescence too. ps here is 20 umol m-2 s-2 so -10 watts*)
160
```

### Physical quantities

```
Po = 1.28 R 298.15 * 10^(-6) (* ref vapor pressure MPA *)
0.00317308

Pa = Patm * 10^(-6) (* atm pressure in MPa*)
0.1013

c[ψ_, θ_] := 1.28  $\frac{R 298.15}{Patm}$  Exp[- $\frac{44000}{R} (\frac{1}{\theta} - \frac{1}{298.15})$ ]
Exp[ $\frac{(\psi + Pa - Po) 18.07}{R \theta}$ ] (* mol fraction for psi in MPa *)

Cvθ = ∂θ c[ψvar, θ] /. θ → θvar (* linearization of dx/dT 1/k *)
Cvψ = ∂ψ c[ψ, θvar] /. ψ → ψvar (* linearization of dx/dpsi 1/mpa *)
0.00184951
0.000226353

λ = 44000 - 43 (θvar - 298.15) (* Joules per Mol *)
44000.
```

```

Dv =  $\frac{Patm}{R \theta var} 2.13 * \left(\frac{\theta var}{273.15}\right)^{1.8} *$ 
       $10^{(-5)}$  (* cDv for mol frac drving force out of leaf *)
0.00101901

kvh = .026; (* heat cond air J m-2 s-1 K-1*)

σ = 5.670373 * 10(-8); (*stefan boltzmann J/m2/s/kelvin-4 *)

F = 1; (*view factor radiative from leaf*)

```

### Leaf parameters

```

e1 = 0.96 (* emissivity leaf *)
0.96

α1 = e1 (* long wave abs leaf *)
0.96

Al = .7 (* .1263 oakair fraction, say 0.5 just mesophyll*)
Av = 1 - Al; (*Area fraction tissue in leaf from 2011 data 12.63%*)
0.7

AU1 = .7; (* .1263 oakair fraction, say 0.5 just mesophyll*)
AUv = 1 - AU1; (*Area fraction tissue in leaf from 2011 data 12.63%*)

L = 100 * 10(-6) (*-20 10(-6)*)
 $\frac{1}{10\ 000}$ 
LU = 100 * 10(-6)
 $\frac{1}{10\ 000}$ 

Check whole leaf air fraction
 $\frac{L Av + LU AUv}{L + LU}$  (*vol weighted area fractions *)
0.3

klh = .2; (* .28614 heat cond tissue*)

kl =
  1 * 10(-6) (* hyd cond tissue recon from on tree hydration (leaf at air temp)*)
 $\frac{1}{1\ 000\ 000}$ 

HA = (0.1) (*mol/m2/s/MPa from vein cutting, no steady state 1D scale factor *)
0.1

```

### Absorbed radiation

```

Q = 0.1 * SRSun / L (* w m-3 volumetric heat source,
  .2 is fraction of total abs solar rad abs in spongy *)
160 000.

QU = 0.9 * SRSun / LU
1.44 * 106

QL (* total solar in lower half of leaf*)
16.

QU LU
144.

QL + QU LU - SRSun
0.

```

### Description of fluxes and relations to env parameters

```

gb1 =  $\frac{2.13 * \left(\frac{\theta air}{273.15}\right)^{1.8} * 10^{(-5)} Patm}{R \theta air}$ 
      (* c(tair)*Dv(Tair), boundary layer molar conductivity *)
0.00101901

δ =  $\left(\frac{2.13 * \left(\frac{\theta air}{273.15}\right)^{1.8} * 10^{(-5)} Patm}{R \theta air}\right) / 1.42$ 
0.000717613

gb1 / δ
1.42

(*delta is from licor 1.42 mol/m2/s g_bw, d=Dv*C_a/g_bw, C_a=40.49 mol/m3*)

kvha = 28 * 1.42 * δ; (* ext heat cond air berry*)

qsl =  $\frac{kvh}{\delta} (\theta le - \theta air)$ ;

qsu =  $\frac{kvh}{\delta} (\theta ue - \theta air)$ ;

qrl = σ e1 θle4 - F al (σ θsur4);
qru = σ e1 θue4 - F al (σ θsur4);

```

```

χ[ψ-, θ-] := 1.28  $\frac{R 298.15}{Patm}$  Exp $\left[-\frac{44\,000}{R} \left(\frac{1}{\theta} - \frac{1}{298.15}\right)\right]$  Exp $\left[\frac{(\psi + Pa - Po) 18.07}{R \theta}\right]$ 
(*for psi in MPa*)
χe = χ[ψle, θle];
χue = χ[ψue, θue];

Jtran =  $\left(\frac{1}{gs} + \frac{\delta}{gbl}\right)^{-1} (\chi_e - \chi_{air})$ ;
UJtran =  $\left(\frac{1}{gsu} + \frac{\delta}{gbl}\right)^{-1} (\chi_{ue} - \chi_{air})$ ;

ψo = ψr - (Jtran + UJtran) / HA
-0.2 - 10.  $\left(\frac{-0.0261552 + 0.0313236 e^{-5291.96 \left(-0.00335402 + \frac{1}{\theta_{le}}\right) - \frac{0.697357}{\theta_{le}}}}{0.704225 + \frac{1}{gs}} + \frac{-0.0261552 + 0.0313236 e^{-5291.96 \left(-0.00335402 + \frac{1}{\theta_{ue}}\right) - \frac{0.697357}{\theta_{ue}}}}{0.704225 + \frac{1}{gsu}}\right)$ 

```

### First iteration

```

Πψ = 1 +  $\frac{Al\ klh + Av\ kvh}{\lambda\ Av\ Dv\ Cv\theta}$  +  $\frac{Al\ klh + Av\ kvh}{\lambda\ Al\ kl}$   $\frac{Cv\psi}{Cv\theta}$  (* greater than one favors conduction over latent *)
7.52835

Πθ = 1 +  $\frac{\lambda\ Al\ kl}{Al\ klh + Av\ kvh}$   $\frac{Av\ Dv\ Cv\theta}{Al\ kl + Av\ Dv\ Cv\psi}$ 
(* greater than one favors latent over conduction *)
1.15318

ΠUψ = 1 +  $\frac{AUl\ klh + AUv\ kvh}{\lambda\ AUv\ Dv\ Cv\theta}$  +  $\frac{AUl\ klh + AUv\ kvh}{\lambda\ AUl\ kl}$   $\frac{Cv\psi}{Cv\theta}$  (* greater than one favors conduction over latent *)
7.52835

ΠUθ = 1 +  $\frac{\lambda\ AUl\ kl}{AUl\ klh + AUv\ kvh}$   $\frac{AUv\ Dv\ Cv\theta}{AUl\ kl + AUv\ Dv\ Cv\psi}$ 
(* greater than one favors latent over conduction *)
1.15318

```

### Global energy conservation

```
SRsun == qsu + qru + qrl + qsl + λ Jtran + λ UJtran;
```

### Solution lower thermal field

$$\theta l[x_] := \theta o + \left(-\frac{x^2}{2 L^2} + \frac{x}{L}\right) \frac{Q L^2}{\Pi\theta (Al\ klh + Av\ kvh)} + \left(-\frac{(qsl + qrl) L}{\Pi\theta (Al\ klh + Av\ kvh)} - \frac{\lambda Al\ kl\ Jtran\ L}{\Pi\theta (Al\ klh + Av\ kvh)} \frac{1}{(Al\ kl + Av\ Dv\ Cv\psi)}\right) \frac{x}{L}$$

### Solution upper thermal field

$$\theta U[x_] := \theta o + \left(-\frac{x^2}{2 LU^2} + \frac{x}{LU}\right) \frac{QU LU^2}{\Pi U\theta (AUl\ klh + AUv\ kvh)} + \left(-\frac{(qsu + qru) LU}{\Pi U\theta (AUl\ klh + AUv\ kvh)} - \frac{\lambda AUl\ kl\ UJtran\ LU}{\Pi U\theta (AUl\ klh + AUv\ kvh)} \frac{1}{(AUl\ kl + AUv\ Dv\ Cv\psi)}\right) \frac{x}{LU}$$

### Solution upper potential field

$$\psi U[x_] := \psi o + \left(\frac{x^2}{2 LU^2} - \frac{x}{LU}\right) \frac{QU LU^2}{\Pi U\psi AUl\ kl\ \lambda} + \left(\frac{(qsu + qru) LU}{\Pi U\psi AUl\ kl\ \lambda} - \frac{UJtran\ LU}{\Pi U\psi AUl\ kl\ \lambda} \frac{AUl\ klh + AUv\ kvh}{AUv\ Dv\ Cv\theta}\right) \frac{x}{LU}$$

### Solution lower potential field

$$\psi l[x_] := \psi o + \left(\frac{x^2}{2 L^2} - \frac{x}{L}\right) \frac{Q L^2}{\Pi\psi Al\ kl\ \lambda} + \left(\frac{(qsl + qrl) L}{\Pi\psi Al\ kl\ \lambda} - \frac{Jtran\ L}{\Pi\psi Al\ kl\ \lambda} \frac{Al\ klh + Av\ kvh}{Av\ Dv\ Cv\theta}\right) \frac{x}{L}$$

### Solve system

```

sol = FindRoot[ $\left\{\frac{\theta U[LU]}{\theta ue} = 1, \frac{\theta l[L]}{\theta le} = 1, \right.$ 
  SRsun == qsu + qru + qrl + qsl + λ Jtran + λ UJtran,  $\frac{\psi l[L]}{\psi le} = 1, \frac{\psi U[LU]}{\psi ue} = 1\}$ ,
  {{θo, θair}, {θue, θair}, {θle, θair}, {gs, .3}, {gsu, .3}}, PrecisionGoal → 4]
{θo → 298.443, θue → 298.444, θle → 298.402, gs → 0.382073, gsu → 0.31033}

```

## update seed values

```

evar = e0 /. sol
psi var = psi0 /. sol
298.443
-0.231144

```

## Second iteration

```

Cv e = d_0 c[psi var, e] /. e -> evar (* linearization of dx/dT 1/k *)
Cv psi = d_0 c[psi, evar] /. psi -> psi var (* linearization of dx/dpsi 1/mpa *)
0.00189208
0.000231891

```

$$\Pi\psi = 1 + \frac{A1\ klh + Av\ kvh}{\lambda\ Av\ Dv\ Cv e} + \frac{A1\ klh + Av\ kvh}{\lambda\ A1\ kl} \frac{Cv\psi}{Cv e} \quad (* \text{ greater than one favors conduction over latent } *)$$

7.39552

$$\Pi e = 1 + \frac{\lambda\ A1\ kl}{A1\ klh + Av\ kvh} \frac{Av\ Dv\ Cv e}{A1\ kl + Av\ Dv\ Cv\psi} \quad (* \text{ greater than one favors latent over conduction } *)$$

1.15636

$$\Pi U\psi = 1 + \frac{A1\ klh + AUv\ kvh}{\lambda\ AUv\ Dv\ Cv e} + \frac{A1\ klh + AUv\ kvh}{\lambda\ A1\ kl} \frac{Cv\psi}{Cv e} \quad (* \text{ greater than one favors conduction over latent } *)$$

7.39552

$$\Pi U e = 1 + \frac{\lambda\ AUv\ kl}{A1\ klh + AUv\ kvh} \frac{AUv\ Dv\ Cv e}{A1\ kl + AUv\ Dv\ Cv\psi} \quad (* \text{ greater than one favors latent over conduction } *)$$

1.15636

```

sol = FindRoot[{{
  eU[LU]
  eue == 1,
  e1[L]
  ele == 1,
  SRsun == qsu + qru + qrl + qsl + lambda Jtran + lambda UJtran,
  psi1[L]
  psi1e == 1,
  psiU[LU]
  psiue == 1}},
  {{e0, eair}, {eue, eair}, {ele, eair}, {gs, .3}, {gsu, .3}}, PrecisionGoal -> 4]
{e0 -> 298.439, eue -> 298.44, ele -> 298.398, gs -> 0.384842, gsu -> 0.31113}

```

## update seed values

```

evar = e0 /. sol
psi var = psi0 /. sol
298.439
-0.23123

```

## Third iteration

```

Cv e = d_0 c[psi var, e] /. e -> evar (* linearization of dx/dT 1/k *)
Cv psi = d_0 c[psi, evar] /. psi -> psi var (* linearization of dx/dpsi 1/mpa *)
0.00189162
0.000231831

```

$$\Pi\psi = 1 + \frac{A1\ klh + Av\ kvh}{\lambda\ Av\ Dv\ Cv e} + \frac{A1\ klh + Av\ kvh}{\lambda\ A1\ kl} \frac{Cv\psi}{Cv e} \quad (* \text{ greater than one favors conduction over latent } *)$$

7.39693

$$\Pi e = 1 + \frac{\lambda\ A1\ kl}{A1\ klh + Av\ kvh} \frac{Av\ Dv\ Cv e}{A1\ kl + Av\ Dv\ Cv\psi} \quad (* \text{ greater than one favors latent over conduction } *)$$

1.15632

$$\Pi U\psi = 1 + \frac{A1\ klh + AUv\ kvh}{\lambda\ AUv\ Dv\ Cv e} + \frac{A1\ klh + AUv\ kvh}{\lambda\ A1\ kl} \frac{Cv\psi}{Cv e} \quad (* \text{ greater than one favors conduction over latent } *)$$

7.39693

$$\Pi U e = 1 + \frac{\lambda\ AUv\ kl}{A1\ klh + AUv\ kvh} \frac{AUv\ Dv\ Cv e}{A1\ kl + AUv\ Dv\ Cv\psi} \quad (* \text{ greater than one favors latent over conduction } *)$$

1.15632

```

sol = FindRoot[{{
  eU[LU]
  eue == 1,
  e1[L]
  ele == 1,
  SRsun == qsu + qru + qrl + qsl + lambda Jtran + lambda UJtran,
  psi1[L]
  psi1e == 1,
  psiU[LU]
  psiue == 1}},
  {{e0, eair}, {eue, eair}, {ele, eair}, {gs, .3}, {gsu, .3}}, PrecisionGoal -> 4]
{e0 -> 298.439, eue -> 298.44, ele -> 298.398, gs -> 0.384812, gsu -> 0.311289}

```

## update seed values

```

evar = e0 /. sol
psi var = psi0 /. sol
298.439
-0.231229

```

## Fourth iteration

```

Cv e = d_e c[psi var, e] /. e -> evar (* linearization of dx/dT 1/k *)
Cv psi = d_psi c[psi, evar] /. psi -> psi var (* linearization of dx/dpsi 1/mpa *)
0.00189163
0.000231831

Pi psi = 1 +  $\frac{A1\ klh + Av\ kvh}{\lambda\ Av\ Dv\ Cv e}$  +
 $\frac{A1\ klh + Av\ kvh}{\lambda\ A1\ kl} \frac{Cv\ psi}{Cv e}$  (* greater than one favors conduction over latent *)
7.39692

 $\frac{A1\ klh + Av\ kvh}{\lambda\ Av\ Dv\ Cv e}$ 
5.8088

 $\frac{A1\ klh + Av\ kvh}{\lambda\ A1\ kl} \frac{Cv\ psi}{Cv e}$ 
0.588113

 $\frac{Cv\ psi}{Cv e}$ 
0.122557

Pi e = 1 +  $\frac{\lambda\ A1\ kl}{A1\ klh + Av\ kvh} \frac{Av\ Dv\ Cv e}{A1\ kl + Av\ Dv\ Cv\ psi}$ 
(* greater than one favors latent over conduction *)
1.15633

Pi U psi = 1 +  $\frac{A1\ U\ klh + AUv\ kvh}{\lambda\ AUv\ Dv\ Cv e}$  +
 $\frac{A1\ U\ klh + AUv\ kvh}{\lambda\ A1\ U\ kl} \frac{Cv\ psi}{Cv e}$  (* greater than one favors conduction over latent *)
7.39692

```

```

Pi U e = 1 +  $\frac{\lambda\ AU1\ kl}{A1\ U\ klh + AUv\ kvh} \frac{AUv\ Dv\ Cv e}{A1\ U\ kl + AUv\ Dv\ Cv\ psi}$ 
(* greater than one favors latent over conduction *)
1.15633

sol = FindRoot[{{ $\frac{\psi U[LU]}{eue} = 1$ ,  $\frac{\psi l[L]}{ele} = 1$ ,
SRsun == qsu + qru + qrl + qsl + lambda Jtran + lambda UJtran,  $\frac{\psi l[L]}{\psi le} = 1$ ,  $\frac{\psi U[LU]}{\psi ue} = 1$ },
{{e0, eair}, {eue, eair}, {ele, eair}, {gs, .3}, {gsu, .3}}, PrecisionGoal -> 4]
{e0 -> 298.439, eue -> 298.44, ele -> 298.398, gs -> 0.384812, gsu -> 0.311289}

```

## check convergence

```

evar - e0 /. sol
5.3918 x 10^-7

psi var - psi0 /. sol
9.97454 x 10^-9

```

## Results

```

MolFrac =
{(x_e - x_air), (x_ue - x_air), x_e, x_ue, x_air} /. sol (* target at Q160 is .0054 *)
{0.00555939, 0.00563885, 0.0317146, 0.031794, 0.0261552}

psi ue = psi U[LU] /. sol (* Water potential upper epidermis *)
-0.419

Temps = {eair, esur, eue, e0, ele, ele - eair} /. sol
{298.15, 298.15, 298.44, 298.439, 298.398, 0.247845}

Potentials = {psi r, psi o, psi ue, psi le} /. sol
{-0.2, -0.231229, -0.419, -0.419}

gs /. sol (* target at Q160 is .7 *)
0.384812

gsu /. sol
0.311289

totalgs = gs + gsu /. sol
0.696102

```

## Fluxes

```

qsu /. sol (*Sensible flux upper*)
10.5052

qru /. sol (*Radiative flux upper*)
1.67573

qsl /. sol (*Sensible flux lower*)
8.97971

qrl /. sol (*Radiative flux lower*)
1.43208

latentlow = λ Jtran /. sol
74.0602

latentup = λ UJtran /. sol
63.347

totallatent = latentlow + latentup
137.407

tranlow = Jtran /. sol (* target at Q160 is .003 *)
0.00168319

tranup = UJtran /. sol
0.00143971

totaltran = tranlow + tranup
0.00312289

```

## Matching Q160

```

totaltran (* expect about .0031 *)
0.00312289

blMFdrop = totaltran / 2.84
0.00109961

χsurf = χair + blMFdrop (* app mol frac at leaf surface *)
0.0272548

appgradientLS = χe - χsurf /. sol (* app MF grad at leaf surf exp .0044 *)
0.00445978

```

$$\text{appgst} = \left( \frac{\chi_e - \chi_{\text{air}}}{\text{totaltran}} - \frac{1}{2.84} \right)^{-1} /. \text{sol} (* 0.7 *)$$

0.700234

## Evaporation distribution percent of totals

$$\text{LiquidtoLower} = \frac{-A_l k_l \partial_x \psi_l[x] /. x \rightarrow L}{J_{\text{tran}} + UJ_{\text{tran}}} /. \text{sol}$$

0.41302

$$\text{LiquidtoUpper} = \frac{-A_U k_l \partial_x \psi_U[x] /. x \rightarrow LU}{J_{\text{tran}} + UJ_{\text{tran}}} /. \text{sol}$$

0.350052

$$\text{VaportoLower} = \frac{1}{J_{\text{tran}} + UJ_{\text{tran}}} (-A_v D_v C_v \psi (\partial_x \psi_l[x] /. x \rightarrow L) - A_v D_v C_v \theta (\partial_x \theta_l[x] /. x \rightarrow L)) /. \text{sol}$$

0.125963

$$\text{VaportoUpper} = \frac{1}{J_{\text{tran}} + UJ_{\text{tran}}} (-A_U D_v C_v \psi (\partial_x \psi_U[x] /. x \rightarrow LU) - A_U D_v C_v \theta (\partial_x \theta_U[x] /. x \rightarrow LU)) /. \text{sol}$$

0.110964

$$(\text{LiquidtoLower} + \text{LiquidtoUpper} + \text{VaportoLower} + \text{VaportoUpper})$$

1.

## Condensation on lower epidermis if following is larger than one:

$$\frac{(q_{sl} + q_{rl})}{J_{\text{tran}} \lambda} \frac{\lambda A_v D_v C_v \theta}{A_l k_l h + A_v k_v h} /. \text{sol}$$

0.0242022

## Condensation on upper epidermis if following is larger than one:

$$\frac{(q_{su} + q_{ru})}{UJ_{\text{tran}} \lambda} \frac{\lambda A_U D_v C_v \theta}{A_U k_l h + A_U v k_v h} /. \text{sol}$$

0.0331031

## Leaf water potential and apparent conductance

$$\text{LowerAvgPotential} = \frac{1}{L} \int_0^L \psi_l[x] dx /. \text{sol}$$

-0.3257

$$\text{UpperAvgPotential} = \frac{1}{LU} \int_0^{LU} \psi U[x] dx /. \text{sol}$$

-0.330382

$$\text{LWP} = \frac{L \text{LowerAvgPotential} + LU \text{UpperAvgPotential}}{L + LU}$$

-0.328041

### Naive view of gradients

$$\text{Kleaf} = \frac{\text{Jtran}}{\psi r - \text{LWP}} /. \text{sol} (* \text{ Apparent conductance, mol m}^{-2} \text{ s}^{-1} \text{ MPa}^{-1} *)$$

0.0131457

### Analysis

#### Analyze proportion peristomatal at Lower Epidermis

$$\text{ProportionPeristomatal} = \frac{-A1 \text{kl} \partial_x \psi l[x] /. x \rightarrow L}{\text{Jtran}} /. \text{sol}$$

0.766295

$$\text{PropPeri} = \frac{-(qsl + qrl)}{\Pi \psi \text{Jtran} \lambda} + \left( 1 + \frac{\lambda \text{Av Dv Cv} \theta}{A1 \text{klh} + \text{Av kvh}} + \frac{\text{Av Dv Cv} \psi}{A1 \text{kl}} \right)^{-1} /. \text{sol}$$

0.766295

$$\frac{-(qsl + qrl)}{\Pi \psi \text{Jtran} \lambda} /. \text{sol}$$

-0.019006

$$\left( 1 + \frac{\lambda \text{Av Dv Cv} \theta}{A1 \text{klh} + \text{Av kvh}} + \frac{\text{Av Dv Cv} \psi}{A1 \text{kl}} \right)^{-1} /. \text{sol}$$

0.785301

#### Evaporation in lower

$$\text{ProportionEvaporationLower} = \frac{A1 \text{kl} \psi l''[x] L}{\text{Jtran}} /. \text{sol}$$

0.0292068

$$\frac{Q L}{\Pi \psi \lambda \text{Jtran}} /. \text{sol} (* \text{integrating evap 2nd derv over L} *)$$

0.0292068

#### Analyze evaporation in upper part of leaf

$$\frac{-A1 \text{kl} \partial_x \psi U[x] /. x \rightarrow LU}{\text{UJtran}} /. \text{sol}$$

0.759305

$$\frac{1}{\text{UJtran}} (-\text{AUv Dv Cv} \psi (\partial_x \psi U[x] /. x \rightarrow LU) - \text{AUv Dv Cv} \theta (\partial_x \theta U[x] /. x \rightarrow LU)) /. \text{sol}$$

0.240695

$$\text{VaportoUpperEpidermis} =$$

$$\frac{1}{\text{UJtran}} (-\text{AUv Dv Cv} \psi (\partial_x \psi U[x] /. x \rightarrow LU) - \text{AUv Dv Cv} \theta (\partial_x \theta U[x] /. x \rightarrow LU)) /. \text{sol}$$

0.240695

$$\text{LiquidtoUpperEpidermis} = \frac{-A1 \text{kl} \partial_x \psi U[x] /. x \rightarrow LU}{\text{UJtran}} /. \text{sol}$$

0.759305

$$\frac{\lambda}{Q U L U} \frac{1}{1} (-\text{AUv Dv Cv} \psi (\partial_x \psi U[x] /. x \rightarrow LU) - \text{AUv Dv Cv} \theta (\partial_x \theta U[x] /. x \rightarrow LU)) /. \text{sol}$$

0.105884

$$\frac{\lambda}{q_{su} + q_{ru}} \frac{1}{1} (-\text{AUv Dv Cv} \psi (\partial_x \psi U[x] /. x \rightarrow LU) - \text{AUv Dv Cv} \theta (\partial_x \theta U[x] /. x \rightarrow LU)) /. \text{sol}$$

1.25174

$$q_{ru} /. \text{sol}$$

1.67573

#### Perivascular vapor

$$\text{VaporFluxintoLower} =$$

$$\frac{1}{\text{Jtran}} (-\text{Av Dv Cv} \psi (\partial_x \psi l[x] /. x \rightarrow 0) - \text{Av Dv Cv} \theta (\partial_x \theta l[x] /. x \rightarrow 0)) /. \text{sol}$$

0.204498

$$\text{PerivascularEvap} = \text{VaporFluxintoLower} - \text{EvapOriginUpper}$$

0.204498 - EvapOriginUpper

$$\text{ProportionPeristomatal} + \text{PerivascularEvap} + \text{EvapOriginUpper} + \text{ProportionEvaporationLower} (* \text{ Check=1} *)$$

1.

## Plots

## Lower Potential

`psiL = psi[x] /. sol /. x -> LX`

$$-0.231229 - 0.18426 X + 0.00702293 \left( -X + \frac{X^2}{2} \right)$$

`Plot[psiL, {X, 0, 1}]`

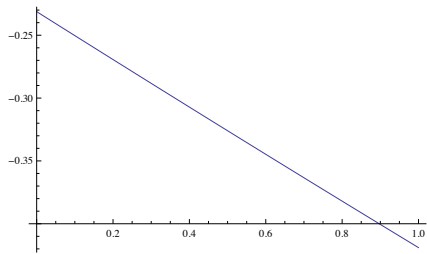

## Upper Potential

`psiU = psi[x] /. sol /. x -> LU X`

$$-0.231229 - 0.156168 X + 0.0632064 \left( -X + \frac{X^2}{2} \right)$$

`Plot[psiU, {X, 0, 1}]`

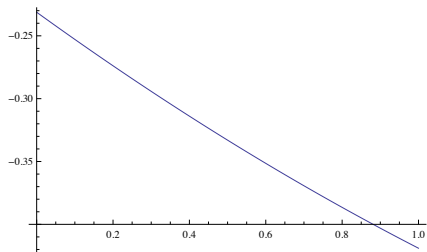

## Lower Thermal

`thetaL = theta[x] /. sol /. x -> LX`

$$298.439 - 0.0454423 X + 0.00936193 \left( X - \frac{X^2}{2} \right)$$

`Plot[thetaL, {X, 0, 1}]`

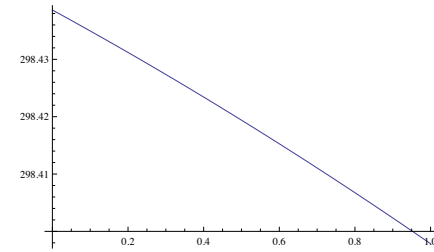

## Upper Thermal

`thetaU = theta[x] /. sol /. x -> LU X`

$$298.439 - 0.0407853 X + 0.0842574 \left( X - \frac{X^2}{2} \right)$$

`Plot[thetaU, {X, 0, 1}]`

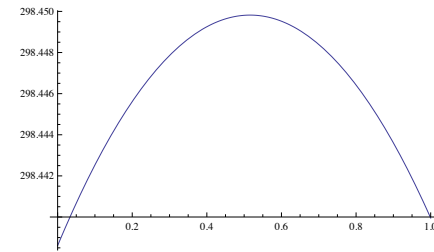

## Upper Vapor Concentration

`cU = c[psi, theta] /. psi -> psiU /. theta -> thetaU;`



```
Plot[cU, {X, 0, 1}]
```

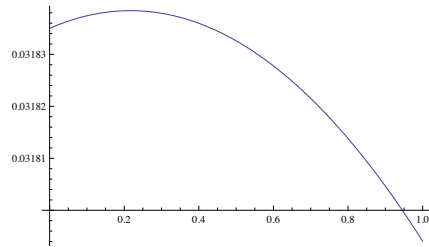

### Lower Vapor Concentration

```
cL = c[ψ, θ] /. ψ → psiL /. θ → thetaL;
```

```
Plot[cL, {X, 0, 1}]
```

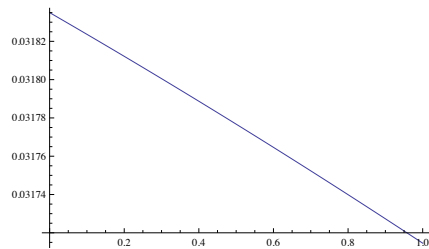

### Whole leaf vapor

```
Show[Plot[cU /. X → -z, {z, 0, -1}], Plot[cL, {X, 0, 1}], PlotRange → All]
```

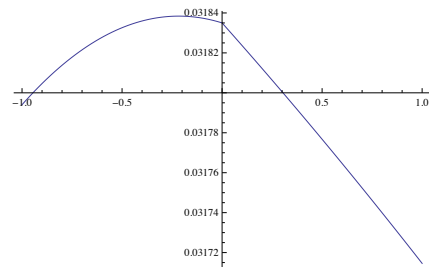

### Whole leaf temperature

```
Show[Plot[thetaU /. X → -z, {z, 0, -1}], Plot[thetaL, {X, 0, 1}], PlotRange → All]
```

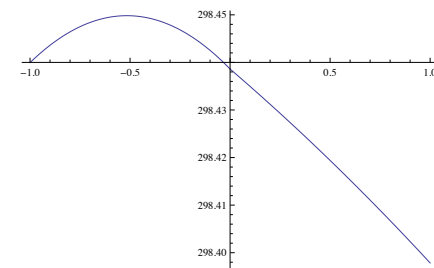

### Whole leaf potential

```
Show[Plot[psiU /. X → -z, {z, 0, -1}], Plot[psiL, {X, 0, 1}],
ListPlot[{{0, ψr}, {0, ψo /. sol}}, Joined → True],
AxesOrigin → {-1.1, ψle /. sol}, PlotRange → All]
```

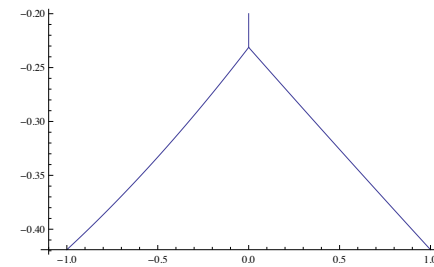

### Export plot data

```
position = Range[-1, 1, .01];
```

```
outpos = Table[0, {Length[position]}];
```

```

potential = Table[0, {Length[position]};
vapor = Table[0, {Length[position]};
temperature = Table[0, {Length[position]};

Do[
  If[ NonNegative[position[[i]]], potential[[i]] = psiL /. X -> position[[i]],
    potential[[i]] = psiU /. X -> -position[[i]],
    {i, Length[position]}]
Do[
  If[ NonNegative[position[[i]]],
    vapor[[i]] = cL /. X -> position[[i]], vapor[[i]] = cU /. X -> -position[[i]],
    {i, Length[position]}]
Do[
  If[ NonNegative[position[[i]]], temperature[[i]] = thetaL /. X -> position[[i]],
    temperature[[i]] = thetaU /. X -> -position[[i]],
    {i, Length[position]}]
Do[
  If[ NonNegative[position[[i]]],
    outpos[[i]] = L * position[[i]], outpos[[i]] = LU * position[[i]],
    {i, Length[position]}]

opdata = Transpose[{outpos, potential};

otdata = Transpose[{outpos, temperature};

ocdata = Transpose[{outpos, vapor};

ListPlot[opdata, Joined -> True]

```

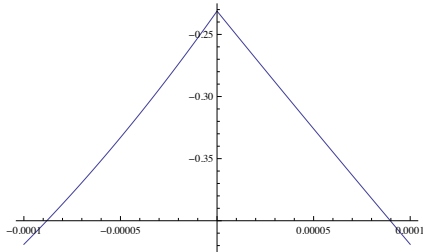

```
ListPlot[ocdata, Joined -> True]
```

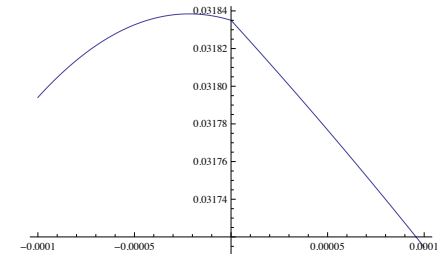

```
ListPlot[otdata, Joined -> True]
```

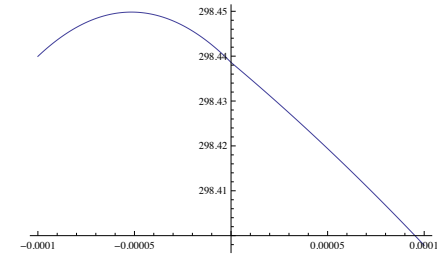

```
(*SetDirectory[ToFileName[NotebookDirectory[]] ]*)
```

```
(*outfile="oak_numeric_*")
```

```
(*Export[outfile<"potential.xls", opdata]*)
```

```
(*Export[outfile<"vapor.xls", ocdata]*)
```

```
(*Export[outfile<"temperature.xls", otdata]*)
```
