# Supplementary material
Source: PubMed Central journal article supplement (PMC3982738)
Supplement: supp_pp.114.236323_236323Supplemental_Text_S7.pdf [file supp_pp.114.236323_236323Supplemental_Text_S7.pdf]

```
Remove["Global`*"]
```

## Oak-like condensing leaf model (Base Case)

### Changing klh, area fractions, and kl to do Berry like simulation

#### Fixed Parameter and initial values that update

```
(*ψle=-2.498(* conserved value based on numerical exposed leaf sol,
gs varies *)*)
ψrinit = -1.29;
θvar = θair; (* θair *)
ψvar = ψrinit; (* ψr *)
vsf = .69(* first guess*)
0.69
```

#### Main Environmental variables

```
rhbase = .85
0.85
QI = 0
0
TI = 0; (* hypothetical temp inc C *)
θair = 273.15 + 28.31 + TI(* new air temp *)
301.46
θairbase = 273.15 + 28.31 (* air temp *)
301.46
```

```
PARout = 1700 (*PARo umol m-2 s-1*)
1700
cloud = 0 (* fraction sky cloudy *)
0
windspeed = 3.86(* Logan airport mean for day m s-1, 1 m/s is 2.37 mph *)
3.86
```

#### Soil dependance of ψ/r

```
Krt = .0056 / (1.29 + -.2);
(*root plus trunk K calc for base case assuming soil -2 bars, isothermal *)
ψg = -.15; (* stem potential from cov'd leaf in mpa *)
ψs = -.2; (* stem potential from cov'd leaf in mpa *)
Krt = .0056 / (1.29 + ψs + ψg);
(*root plus trunk K calc for base case assuming soil -2 bars, isothermal *)
ψr = ψg + ψs - Jtran / Krt
-0.35 - 167.857 Jtran
```

#### Other Environmental parameters

```
R = 8.3145; (*gas constant Joules per mole per Kelvin*)
Patm = 1.013 × 10^5; (*atm pressure in Pa*)
θsur = θair;
χa[relh_, θ_] := relh  $\left( 1.28 \frac{R 298.15}{Patm} \text{Exp} \left[ -\frac{44000}{R} \left( \frac{1}{\theta} - \frac{1}{298.15} \right) \right] \right)$ 
cvbase = rhbase  $\left( 1.28 \frac{298.15}{\theta_{airbase}} \text{Exp} \left[ -\frac{44000}{R} \left( \frac{1}{\theta_{airbase}} - \frac{1}{298.15} \right) \right] \right)$ 
(* wv conc at init temp conserved as temp inc *)
1.30759
cvcase = 1.28  $\frac{298.15}{\theta_{air}} \text{Exp} \left[ -\frac{44000}{R} \left( \frac{1}{\theta_{air}} - \frac{1}{298.15} \right) \right]$ 
(* wvc that would be satur at new temp *)
1.53834
RH = cvbase / cvcase(* new chi from new rh *)
0.85
```

```

χair = χa[RH, θair] (* From Licor matching external conditions *)
0.032354

αsr = 0.4(* absorbance over all solar PAR+NIR, 400 to 3000 nm, range .4 to .6 *)
0.4

r = 0.15 (* reflectance of surroundings to solar radiation Nobel *)
0.15

Assimilation = 19.7 × 10-6 (* mol m-2 s-1*)
0.0000197

AE = 479000 * Assimilation (* 479 kJ per mole co2 fixed, J m-2 s-1 *)
FE = .01 αsr  $\left( \frac{1}{.45} * PAR_{out} * 10^{(-6)} * 2.35 * 10^5 \right) (1+r)$ 
(* J m-2 s-1 Energy lost to fluorescence, 3% of abs vis *)
9.4363
4.08378

SRsun = αsr  $\left( \frac{1}{.45} * PAR_{out} * 10^{(-6)} * 2.35 * 10^5 \right) (1+r) - AE - FE + QI$ 
(* neglect reflectance *)
(* coeff J mol-1,
from Campbell intro env biophysics p 151: Total E incident is about 2x E in PAR,
then typical leaf abs is about half that amount,
so PAR plus NIR about equal to all E in PAR. OR 2.22 =1/.45 is factor
mult PAR campbell but also could subtract ps E at 479 kj per mol co2,
and then fluorescence too. ps here is 20 umol m-2 s-2 so ~10 watts*)
394.858

N[479 * 20 * 10-3]
9.58

```

### Physical quantities

```

Po = 1.28 R 298.15 * 10(-6) (* ref vapor pressure MPa *)
0.00317308

Pa = Patm * 10-6 (* atm pressure in MPa*)
0.1013

c[ψ_, θ_] := 1.28  $\frac{R 298.15}{Patm} \text{Exp}\left[-\frac{44000}{R} \left(\frac{1}{\theta} - \frac{1}{298.15}\right)\right]$ 
 $\text{Exp}\left[\frac{(\psi + Pa - Po) 18.07}{R \theta}\right]$  (*mol fraction for psi in MPa*)

```

```

Cvθ = ∂θ c[ψvar, θ] /. θ → θvar (* linearization of dx/dT 1/k *)
Cvψ = ∂ψ c[ψ, θvar] /. ψ → ψvar (* linearization of dx/dpsi 1/mpa *)
0.00219861
0.000272063

λ = 44000 - 43 (θvar - 298.15) (* Joules per Mol*)
43857.7

Dv =  $\frac{Patm}{R \theta var} 2.13 * \left(\frac{\theta var}{273.15}\right)^{1.8} *$ 
 $10^{(-5)}$  (* cDv for mol frac drving force out of leaf *)
0.00102805

kvh = .026; (* heat cond air J m-2 s-1 K-1*)
σ = 5.670373 * 10(-8); (*stefan boltzmann J/m2/s/kelvin-4 *)
F = 1; (*view factor radiative from leaf*)

eac = 1.72  $\left(\frac{Patm \chi a[RH, \theta air]}{1000 \theta air}\right)^{1/7}$ 
(*.32 rh logan airport,vapor pressure is in kpa, campbell p 162*)
0.901573

ealt = .553  $\left(\frac{Patm \chi a[RH, \theta air]}{100}\right)^{1/7}$  (* Brutsaert 1975*)
0.910396

ealt2 = 1.24  $\left(\frac{Patm \chi a[RH, \theta air]}{100 \theta air}\right)^{1/7}$  (* Brutsaert 1975*)
0.903132

ebrunt = .51 + .066  $\left(\frac{Patm \chi a[RH, \theta air]}{100}\right)^{1/2}$ 
0.887844

ea = (1 - .84 cloud) eac + .84 cloud (* campbell p 162*)
0.901573

Leaf parameters temp corrected
vcx = 1 + 0.024 TI (* xylem, see viscosity corr xls)
1.

```

```

vct = 1 + .0812 TI (**)
1.

e1 = 0.96 (* emissivity leaf *)
0.96

al = e1 (* long wave abs leaf *)
0.96

charlength = .1 (* length normal to wind, m *)
0.1

delta = 4 * (charlength / windspeed)^(1/2) * 10^(-3) (* in m: cuvette leaf boundary layer*)
0.000643823

Al = .15 (* .1263 oakair fraction, say 0.5 just mesophyll*)
Av = 1 - Al; (*Area fraction tissue in leaf from 2011 data 12.63%*)
0.15

Aul = .8; (* .1263 oakair fraction, say 0.5 just mesophyll*)
Auv = 1 - Aul; (*Area fraction tissue in leaf from 2011 data 12.63%*)

L = .72 * 131 * 10^(-6) (*-20 10^(-6)*)
0.00009432

LU = 1.28 * 131 * 10^(-6)
0.00016768

Check whole leaf air fraction
(L Av + LU Auv) / (L + LU) (*vol weighted area fractions *)
0.434

klh = .28614; (* heat cond tissue*)

ktotal = vct 6.45 * 10^(-7); (* hyd cond leaf mol/m/s/mpa *)

kl = (ktotal - .1263 Dv Cv psi) / (1 - .1263)
(* hyd cond tissue recon from on tree hydration (leaf at air temp)*)
6.97808 * 10^(-7)

H = .021; (* mol/m2/s/MPa from vein cutting, no steady state 1D scale factor *)

HA = vcx H vsf (* adj for viscosity (vcx) and 3D (vsf)*)
0.01449

```

## Absorbed radiation

$Q = 0.2 * SRsun / L$  (\* w m<sup>-3</sup> volumetric heat source,  
 .2 is fraction of total abs solar rad abs in spongy \*)  
 837.272.

$QU = 0.8 * SRsun / LU$   
 1.88386 \* 10<sup>6</sup>

$QL$  (\* total solar in lower half of leaf\*)  
 78.9715

$QU LU$   
 315.886

$QL + QU LU - SRsun$   
 0.

## Description of fluxes and relations to env parameters

(\*delta is from licor 1.42 mol/m2/s g\_bw, d=Dv\*C\_a/g\_bw, C\_a=40.49 mol/m3\*)

$$q_{s1} = \frac{k_{vh}}{\delta} (\theta_{le} - \theta_{air});$$

$$q_{su} = \frac{k_{vh}}{\delta} (\theta_{ue} - \theta_{air});$$

$$q_{r1} = \sigma e1 \theta_{le}^4 - F_{al} (\sigma \theta_{sur}^4);$$

$$q_{ru} = \sigma e1 \theta_{ue}^4 - F_{al} (\sigma \theta_{air}^4);$$

$$\chi[\psi_-, \theta_-] := 1.28 \frac{R 298.15}{Patm} \text{Exp}\left[-\frac{44000}{R} \left(\frac{1}{\theta} - \frac{1}{298.15}\right)\right] \text{Exp}\left[\frac{(\psi + Pa - Po) 18.07}{R \theta}\right]$$

(\*for psi in MPa\*)

$$\chi_e = \chi[\psi_{le}, \theta_{le}];$$

$$g_{bl} = \frac{2.13 * \left(\frac{\theta_{air}}{273.15}\right)^{1.8} * 10^(-5) Patm}{R \theta_{air}}$$

(\* c(tair)\*Dv(Tair), boundary layer molar conductivity \*)  
 0.00102805

$$g_{bl} / \delta$$

1.59679

$$J_{tran} = \left(\frac{1}{g_s} + \frac{\delta}{g_{bl}}\right)^{-1} (\chi_e - \chi_{air});$$

$$\psi_o = \psi_r - J_{\text{tr}} / HA$$

$$-0.35 - \frac{1}{0.626256 + \frac{1}{g_s}} 236.87 \left( -0.032354 + 0.0313236 e^{-5291.96 \left( -0.00335402 + \frac{1}{e_{1e}} \right) + \frac{2.17331 (0.0981269 + z_{1e})}{e_{1e}}} \right)$$

### First iteration

$$\Pi\psi = 1 + \frac{Al\ klh + Av\ kvh}{\lambda\ Av\ Dv\ Cv\theta} + \frac{Al\ klh + Av\ kvh}{\lambda\ Al\ kl} \frac{Cv\psi}{Cv\theta} \quad (* \text{ greater than one favors conduction over latent } *)$$

3.52435

$$\Pi\theta = 1 + \frac{\lambda\ Al\ kl}{Al\ klh + Av\ kvh} \frac{Av\ Dv\ Cv\theta}{Al\ kl + Av\ Dv\ Cv\psi} \quad (* \text{ greater than one favors latent over conduction } *)$$

1.39614

$$\Pi U\psi = 1 + \frac{AU1\ klh + AUv\ kvh}{\lambda\ AUv\ Dv\ Cv\theta} + \frac{AU1\ klh + AUv\ kvh}{\lambda\ AU1\ kl} \frac{Cv\psi}{Cv\theta} \quad (* \text{ greater than one favors conduction over latent } *)$$

13.9915

$$\Pi U\theta = 1 + \frac{\lambda\ AU1\ kl}{AU1\ klh + AUv\ kvh} \frac{AUv\ Dv\ Cv\theta}{AU1\ kl + AUv\ Dv\ Cv\psi} \quad (* \text{ greater than one favors latent over conduction } *)$$

1.07697

### Stomatal conductance

$$g_{\text{max}} = 0.36$$

$$0.36$$

$$\text{stomata}[z\_] = g_{\text{max}} (1 - \text{Exp}[(-5.2 - z) / 1.5])$$

$$0.36 (1 - e^{0.666667 (-5.2 - z)})$$

### Global energy conservation

$$SR_{\text{sun}} == q_{\text{su}} + q_{\text{ru}} + q_{\text{rl}} + q_{\text{sl}} + \lambda J_{\text{tr}} ;$$

### Solution lower thermal field

$$\theta l[x\_] := \theta_o + \left( -\frac{x^2}{2L^2} + \frac{x}{L} \right) \frac{Q L^2}{\Pi\theta (Al\ klh + Av\ kvh)} + \left( -\frac{(q_{\text{sl}} + q_{\text{rl}}) L}{\Pi\theta (Al\ klh + Av\ kvh)} - \frac{\lambda Al\ kl J_{\text{tr}} L}{\Pi\theta (Al\ klh + Av\ kvh)} \frac{1}{(Al\ kl + Av\ Dv\ Cv\psi)} \right) \frac{x}{L}$$

### Solution upper thermal field

$$\theta U[x\_] := \theta_o + \left( -\frac{x^2}{2LU^2} + \frac{x}{LU} \right) \frac{QU LU^2}{\Pi U\theta (AU1\ klh + AUv\ kvh)} - \left( \frac{(q_{\text{su}} + q_{\text{ru}}) LU}{\Pi U\theta (AU1\ klh + AUv\ kvh)} \right) \frac{x}{LU}$$

### Solution upper potential field

$$\psi U[x\_] := \psi_o + \left( \frac{x^2}{2LU^2} - \frac{x}{LU} \right) \frac{QU LU^2}{\Pi U\psi AU1\ kl\ \lambda} + \left( \frac{(q_{\text{su}} + q_{\text{ru}}) LU}{\Pi U\psi AU1\ kl\ \lambda} \right) \frac{x}{LU}$$

### Solution lower potential field

$$\psi l[x\_] := \psi_o + \left( \frac{x^2}{2L^2} - \frac{x}{L} \right) \frac{QL^2}{\Pi\psi Al\ kl\ \lambda} + \left( \frac{(q_{\text{sl}} + q_{\text{rl}}) L}{\Pi\psi Al\ kl\ \lambda} - \frac{J_{\text{tr}} L}{\Pi\psi Al\ kl\ \lambda} \frac{Al\ klh + Av\ kvh}{Av\ Dv\ Cv\theta} \right) \frac{x}{L}$$

### Solve system

$$\text{sol} = \text{FindRoot}\left[\left\{\frac{\theta U[LU]}{\theta_{ue}} = 1, \frac{\theta l[L]}{\theta_{le}} = 1, SR_{\text{sun}} == q_{\text{su}} + q_{\text{ru}} + q_{\text{rl}} + q_{\text{sl}} + \lambda J_{\text{tr}}, \frac{\psi l[L]}{\psi_{le}} = 1, \frac{\text{stomata}[\psi_{le}]}{g_s} = 1\right\}, \{\{\theta_o, \theta_{\text{air}}\}, \{\theta_{ue}, \theta_{\text{air}}\}, \{\theta_{le}, \theta_{\text{air}}\}, \{\psi_{le}, \psi_{\text{rinit}}\}, \{g_s, 0.3\}\}, \text{PrecisionGoal} \rightarrow 4\right]$$

{θ<sub>o</sub> → 303.883, θ<sub>ue</sub> → 303.884, θ<sub>le</sub> → 303.771, ψ<sub>le</sub> → -1.24945, g<sub>s</sub> → 0.334148}

### update seed values

$$\text{Biotout} = \frac{HL(\psi_o - \psi_{le})}{(Al\ kl + Av\ Dv\ Cv\psi)(\psi_o - \psi_{le}) + Av\ Dv\ Cv\theta(\theta_o - \theta_{le})} /. \text{sol}$$

1.35971

$$\theta_{\text{var}} = \theta_o /. \text{sol}$$

$$\psi_{\text{var}} = \psi_o /. \text{sol}$$

$$303.883$$

$$-1.05637$$

```
vsf = (.151 Biotout + 1.03) ^ (-1) (* vasc scale factor
steady state based on geometry of veis and eff biot number*)
0.809509
```

## Second iteration

```
Cvθ = ∂θ c[ψvar, θ] /. θ → θvar (* linearization of dχ/dT 1/k *)
Cvψ = ∂ψ c[ψ, θvar] /. ψ → ψvar (* linearization of dχ/dpsi 1/mpa *)
0.00249289
```

```
0.000310989
```

$$\Pi\psi = 1 + \frac{A1\ klh + Av\ kvh}{\lambda\ Av\ Dv\ Cv\theta} + \frac{A1\ klh + Av\ kvh}{\lambda\ A1\ kl} \frac{Cv\psi}{Cv\theta} \quad (* \text{ greater than one favors conduction over latent } *)$$

```
3.44751
```

$$\Pi\theta = 1 + \frac{\lambda\ A1\ kl}{A1\ klh + Av\ kvh} \frac{Av\ Dv\ Cv\theta}{A1\ kl + Av\ Dv\ Cv\psi} \quad (* \text{ greater than one favors latent over conduction } *)$$

```
1.40858
```

$$\Pi U\psi = 1 + \frac{A1\ klh + AUv\ kvh}{\lambda\ AUv\ Dv\ Cv\theta} + \frac{A1\ klh + AUv\ kvh}{\lambda\ A1\ kl} \frac{Cv\psi}{Cv\theta} \quad (* \text{ greater than one favors conduction over latent } *)$$

```
12.6072
```

$$\Pi U\theta = 1 + \frac{\lambda\ A1\ kl}{A1\ klh + AUv\ kvh} \frac{AUv\ Dv\ Cv\theta}{A1\ kl + AUv\ Dv\ Cv\psi} \quad (* \text{ greater than one favors latent over conduction } *)$$

```
1.08615
```

```
sol = FindRoot[{{
   $\frac{\theta U[LU]}{\theta ue} = 1, \frac{\theta l[L]}{\theta le} = 1,$ 
   $SRSun == qsu + qru + qrl + qsl + \lambda Jtran, \frac{\psi l[L]}{\psi le} = 1, \frac{stomata[\psi le]}{gs} = 1$ 
}}, {{
  {θo, θair}, {θue, θair}, {θle, θair}, {ψle, ψrinit}, {gs, 0.3}}, PrecisionGoal → 4]
{θo → 303.876, θue → 303.877, θle → 303.768, ψle → -1.18808, gs → 0.335184}
```

## update seed values

$$\text{Biotout} = \frac{HL(\psi_o - \psi_{le})}{(A1\ kl + Av\ Dv\ Cv\psi)(\psi_o - \psi_{le}) + Av\ Dv\ Cv\theta(\theta_o - \theta_{le})} \quad /. \text{sol}$$

```
0.906002
```

```
sf = (.151 Biotout + 1.03) ^ (-1)
```

```
0.85704
```

```
θvar = θo /. sol
```

```
ψvar = ψo /. sol
```

```
303.876
```

```
-1.05895
```

```
vsf = (.151 Biotout + 1.03) ^ (-1) (* vasc scale factor
steady state based on geometry of veis and eff biot number*)
0.85704
```

## Third iteration

```
Cvθ = ∂θ c[ψvar, θ] /. θ → θvar (* linearization of dχ/dT 1/k *)
Cvψ = ∂ψ c[ψ, θvar] /. ψ → ψvar (* linearization of dχ/dpsi 1/mpa *)
0.00249189
```

```
0.000310855
```

$$\Pi\psi = 1 + \frac{A1\ klh + Av\ kvh}{\lambda\ Av\ Dv\ Cv\theta} + \frac{A1\ klh + Av\ kvh}{\lambda\ A1\ kl} \frac{Cv\psi}{Cv\theta} \quad (* \text{ greater than one favors conduction over latent } *)$$

```
3.44774
```

$$\Pi\theta = 1 + \frac{\lambda\ A1\ kl}{A1\ klh + Av\ kvh} \frac{Av\ Dv\ Cv\theta}{A1\ kl + Av\ Dv\ Cv\psi} \quad (* \text{ greater than one favors latent over conduction } *)$$

```
1.40854
```

$$\Pi U\psi = 1 + \frac{A1\ klh + AUv\ kvh}{\lambda\ AUv\ Dv\ Cv\theta} + \frac{A1\ klh + AUv\ kvh}{\lambda\ A1\ kl} \frac{Cv\psi}{Cv\theta} \quad (* \text{ greater than one favors conduction over latent } *)$$

```
12.6113
```

$$\Pi\theta = 1 + \frac{\lambda A_{U1} k_l}{A_{U1} k_{lh} + A_{Uv} k_{vh}} \frac{A_{Uv} D_v C_v \theta}{A_{U1} k_l + A_{Uv} D_v C_v \psi}$$

(\* greater than one favors latent over conduction \*)

1.08612

$$\text{sol} = \text{FindRoot}\left[\left\{\frac{\theta_U[\text{LU}]}{\theta_{ue}} = 1, \frac{\theta_l[\text{L}]}{\theta_{le}} = 1, \text{SRsun} == \text{qsu} + \text{qru} + \text{qrl} + \text{qsl} + \lambda \text{Jtran}, \frac{\psi_l[\text{L}]}{\psi_{le}} = 1, \frac{\text{stomata}[\psi_{le}]}{\text{gs}} = 1\right\}, \left\{\{\theta_0, \theta_{air}\}, \{\theta_{ue}, \theta_{air}\}, \{\theta_{le}, \theta_{air}\}, \{\psi_{le}, \psi_{rinit}\}, \{\text{gs}, 0.3\}\right\}, \text{PrecisionGoal} \rightarrow 4\right]$$

{ $\theta_0 \rightarrow 303.876$ ,  $\theta_{ue} \rightarrow 303.877$ ,  $\theta_{le} \rightarrow 303.768$ ,  $\psi_{le} \rightarrow -1.18827$ ,  $\text{gs} \rightarrow 0.335181$ }

### update seed values

$$\text{Biotout} = \frac{H L (\psi_0 - \psi_{le})}{(A_l k_l + A_v D_v C_v \psi) (\psi_0 - \psi_{le}) + A_v D_v C_v \theta (\theta_0 - \theta_{le})} /. \text{sol}$$

0.907401

$$\text{sf} = (.151 \text{Biotout} + 1.03)^{-1}$$

0.856885

$$\theta_{var} = \theta_0 /. \text{sol}$$

$$\psi_{var} = \psi_0 /. \text{sol}$$

303.876

-1.05894

$$\text{vsf} = (.151 \text{Biotout} + 1.03)^{-1} (* \text{vasc scale factor steady state based on geometry of veis and eff biot number} *)$$

0.856885

### Fourth iteration

$$C_v \theta = \partial_\theta c[\psi_{var}, \theta] /. \theta \rightarrow \theta_{var} (* \text{linearization of } d\chi/dT \text{ 1/k} *)$$

$$C_v \psi = \partial_\psi c[\psi, \theta_{var}] /. \psi \rightarrow \psi_{var} (* \text{linearization of } d\chi/d\psi \text{ 1/mpa} *)$$

0.00249189

0.000310856

$$\Pi\psi = 1 + \frac{A_l k_{lh} + A_v k_{vh}}{\lambda A_v D_v C_v \theta} + \frac{A_l k_{lh} + A_v k_{vh}}{\lambda A_l k_l} \frac{C_v \psi}{C_v \theta} (* \text{greater than one favors conduction over latent} *)$$

3.44774

$$\Pi\theta = 1 + \frac{\lambda A_l k_l}{A_l k_{lh} + A_v k_{vh}} \frac{A_v D_v C_v \theta}{A_l k_l + A_v D_v C_v \psi}$$

(\* greater than one favors latent over conduction \*)

1.40854

$$\Pi\psi = 1 + \frac{A_{U1} k_{lh} + A_{Uv} k_{vh}}{\lambda A_{Uv} D_v C_v \theta} + \frac{A_{U1} k_{lh} + A_{Uv} k_{vh}}{\lambda A_{U1} k_l} \frac{C_v \psi}{C_v \theta} (* \text{greater than one favors conduction over latent} *)$$

12.6113

$$\Pi\theta = 1 + \frac{\lambda A_{U1} k_l}{A_{U1} k_{lh} + A_{Uv} k_{vh}} \frac{A_{Uv} D_v C_v \theta}{A_{U1} k_l + A_{Uv} D_v C_v \psi}$$

(\* greater than one favors latent over conduction \*)

1.08612

$$\text{sol} = \text{FindRoot}\left[\left\{\frac{\theta_U[\text{LU}]}{\theta_{ue}} = 1, \frac{\theta_l[\text{L}]}{\theta_{le}} = 1, \text{SRsun} == \text{qsu} + \text{qru} + \text{qrl} + \text{qsl} + \lambda \text{Jtran}, \frac{\psi_l[\text{L}]}{\psi_{le}} = 1, \frac{\text{stomata}[\psi_{le}]}{\text{gs}} = 1\right\}, \left\{\{\theta_0, \theta_{air}\}, \{\theta_{ue}, \theta_{air}\}, \{\theta_{le}, \theta_{air}\}, \{\psi_{le}, \psi_{rinit}\}, \{\text{gs}, 0.3\}\right\}, \text{PrecisionGoal} \rightarrow 4\right]$$

{ $\theta_0 \rightarrow 303.876$ ,  $\theta_{ue} \rightarrow 303.877$ ,  $\theta_{le} \rightarrow 303.768$ ,  $\psi_{le} \rightarrow -1.18827$ ,  $\text{gs} \rightarrow 0.335181$ }

$$\text{Biotout} = \frac{H L (\psi_0 - \psi_{le})}{(A_l k_l + A_v D_v C_v \psi) (\psi_0 - \psi_{le}) + A_v D_v C_v \theta (\theta_0 - \theta_{le})} /. \text{sol}$$

0.907396

$$\text{sf} = (.151 \text{Biotout} + 1.03)^{-1} (* \text{vasc scale factor steady state based on geometry of veis and eff biot number} *)$$

0.856886

### check convergence

$$\theta_{var} - \theta_0 /. \text{sol}$$

$7.18443 \times 10^{-8}$

$$\psi_{var} - \psi_0 /. \text{sol}$$

$2.43227 \times 10^{-8}$

$$\text{sf} - \text{vsf}$$

$4.76636 \times 10^{-7}$

## Results

```
MolFrac = {(xe - xair), xe, xair} /. sol
{0.0108037, 0.0431577, 0.032354}

gs /. sol
0.335181

ψue = ψU[LU] /. sol (* Water potential upper epidermis *)
-1.05976

Temps = {θair, θsur, θue, θo, θle, θle - θair} /. sol
{301.46, 301.46, 303.877, 303.876, 303.768, 2.30848}

Potentials = {ψr, ψo, ψue, ψle} /. sol
{-0.852389, -1.05894, -1.05976, -1.18827}
```

## Fluxes

```
qsu /. sol (*Sensible flux upper*)
97.5979

qru /. sol (*Radiative flux upper*)
58.8411

qsl /. sol (*Sensible flux lower*)
93.225

qrl /. sol (*Radiative flux lower*)
13.9297

λ Jtran /. sol
131.264

Jtran /. sol
0.00299295
```

## Leaf water potential and apparent conductance

```
LowerAvgPotential =  $\frac{1}{L} \int_0^L \psi_l[x] dx$  /. sol
-1.16282
```

```
UpperAvgPotential =  $\frac{1}{LU} \int_0^{LU} \psi_U[x] dx$  /. sol
-1.07365
```

```
LWP =  $\frac{L \text{LowerAvgPotential} + LU \text{UpperAvgPotential}}{L + LU}$ 
-1.10575
```

## Naive view of gradients

```
Kleaf =  $\frac{J_{tr}an}{\psi_r - LWP}$  /. sol (* Apparent conductance, mol m-2 s-1 MPa-1*)
0.011813
```

## Informed view of gradients

```
nondnumericpsiavg = .721 -  $\frac{.219}{\text{Biotout}}$ 
0.47965
```

```
ScaledPsiAverageLeaf = nondnumericpsiavg * (ψr - ψle) + ψle /. sol
(* cf 0.65 for oak (scaled k est on tree and leaf paper): given true psie
and psir as defined in numeric simulation gives average potential in
domain. Justified if 1D steady sol is scaled to 3d as it is here *)
-1.02716
```

```
kleaf = Jtran / (ψr - ScaledPsiAverageLeaf) /. sol
0.0171248
```

## Evaporation distribution

```
ProportionPeristomatal =  $\frac{-A_l k_l \partial_x \psi_l[x] /. x \rightarrow L}{J_{tr}an}$  /. sol
-0.0392977
```

```
ProportionEvaporationLower =  $\frac{A_l k_l \psi_l''[x] L}{J_{tr}an}$  /. sol
0.174498
```

```
EvapOriginUpper =  $\frac{QU LU - (qsu + qru)}{\Pi U \psi \lambda J_{tr}an}$  /. sol
0.0963186
```

```
VaporFluxintoLower =
  1
  ----- (-Av Dv Cvψ ( ∂x ψl[x] /. x → 0) - Av Dv Cvθ ( ∂x θl[x] /. x → 0)) /. sol
  Jtran
0.8648

PerivascularEvap = VaporFluxintoLower - EvapOriginUpper
0.768481

ProportionPeristomatal + PerivascularEvap +
EvapOriginUpper + ProportionEvaporationLower (* Check=1 *)
1.

ApparentLength = (ProportionPeristomatal + 0.5 ProportionEvaporationLower)
(* Dist from evap site to vasc *)
0.0479514
```

## Analysis

### Analyze proportion peristomatal at Lower Epidermis

```
ProportionPeristomatal =  $\frac{-A1 \text{ kl } \partial_x \psi l[x] /. x \rightarrow L}{Jtran}$  /. sol
-0.0392977

PropPeri =  $\frac{-(qs1 + qr1)}{\pi \psi Jtran \lambda} + \left(1 + \frac{\lambda Av Dv Cv\theta}{A1 \text{ klh} + Av \text{ kvh}} + \frac{Av Dv Cv\psi}{A1 \text{ kl}}\right)^{-1}$  /. sol
-0.0392977

 $\frac{-(qs1 + qr1)}{\pi \psi Jtran \lambda}$  /. sol
-0.236772

 $\left(1 + \frac{\lambda Av Dv Cv\theta}{A1 \text{ klh} + Av \text{ kvh}} + \frac{Av Dv Cv\psi}{A1 \text{ kl}}\right)^{-1}$  /. sol
0.197475
```

### Condensation on lower epidermis if following is larger than one:

```
 $\frac{(qs1 + qr1)}{Jtran \lambda} \frac{\lambda Av Dv Cv\theta}{A1 \text{ klh} + Av \text{ kvh}}$  /. sol
1.199
```

### Total internal vapor arriving at lower epidermis (non-peristomatal)

```
ProportionInternalVapor =
  1
  ----- (- Av Dv Cvψ ( ∂x ψl[x] /. x → L) - Av Dv Cvθ ( ∂x θl[x] /. x → L)) /. sol
  Jtran
1.0393

ProportionPeristomatal + ProportionInternalVapor
1.
```

### Evaporation in lower

```
ProportionEvaporationLower =  $\frac{A1 \text{ kl } \psi l''[x] L}{Jtran}$  /. sol
0.174498

 $\frac{QL}{\pi \psi \lambda Jtran}$  /. sol (*integrating evap 2nd derv over L *)
0.174498
```

### Analyze evaporation in upper part of leaf

```
LiquidFluxintoUpper =  $\frac{-A1 \text{ kl } \partial_x \psi U[x] /. x \rightarrow 0}{Jtran}$  /. sol
0.0963186

EvapOriginUpper =  $\frac{QU LU - (qsu + qru)}{\pi U \psi \lambda Jtran}$  /. sol
0.0963186

VaporFluxintoUpper =
  1
  ----- (-AUv Dv Cvψ ( ∂x ψU[x] /. x → 0) - AUv Dv Cvθ ( ∂x θU[x] /. x → 0)) /. sol
  Jtran
-0.0963186

CondensationUpperEpidermis =
  1
  ----- (-AUv Dv Cvψ ( ∂x ψU[x] /. x → LU) - AUv Dv Cvθ ( ∂x θU[x] /. x → LU)) /. sol
  1
0.000282838

FluxFromUpperEpidermis =  $\frac{-A1 \text{ kl } \partial_x \psi U[x] /. x \rightarrow LU}{1}$  /. sol
-0.000282838
```



```


$$\frac{\lambda}{QU LU} \frac{1}{1} (-AUv Dv Cv\psi (\partial_x \psi U[x] /. x \rightarrow LU) - AUv Dv Cv\theta (\partial_x \theta U[x] /. x \rightarrow LU)) /. sol$$

0.0392693

```

```


$$\frac{\lambda}{qsu + qru} \frac{1}{1} (-AUv Dv Cv\psi (\partial_x \psi U[x] /. x \rightarrow LU) - AUv Dv Cv\theta (\partial_x \theta U[x] /. x \rightarrow LU)) /. sol$$

0.0792937

```

```

qru /. sol
58.8411

```

### Perivascular vapor

VaporFluxintoLower =

```


$$\frac{1}{Jtran} (-Av Dv Cv\psi (\partial_x \psi l[x] /. x \rightarrow 0) - Av Dv Cv\theta (\partial_x \theta l[x] /. x \rightarrow 0)) /. sol$$

0.8648

```

```

PerivascularEvap = VaporFluxintoLower - EvapOriginUpper
0.768481

```

```

ProportionPeristomatal + PerivascularEvap +
EvapOriginUpper + ProportionEvaporationLower (* Check=1 *)
1.

```

## Plots

### Lower Potential

```

psiL = \psi l[x] /. sol /. x \to L X
-1.05894 + 0.105985 X + 0.470617 (-1. X + 0.5 X^2)

```

```
Plot[psiL, {X, 0, 1}]
```

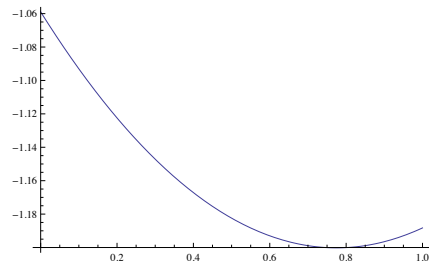

### Upper Potential

```

psiU = \psi U[x] /. sol /. x \to L U X
-1.05894 + 0.084956 X + 0.171546 (-1. X + 0.5 X^2)

```

```
Plot[psiU, {X, 0, 1}]
```

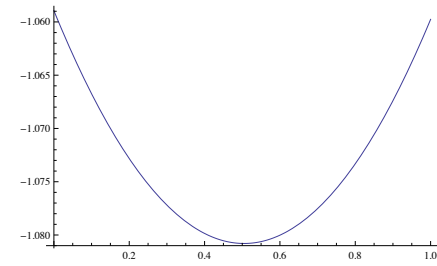

### Lower Thermal

```

thetaL = \theta l[x] /. sol /. x \to L X
303.876 - 0.147957 X + 0.0813301 (1. X - 0.5 X^2)

```

```
Plot[thetaL, {X, 0, 1}]
```

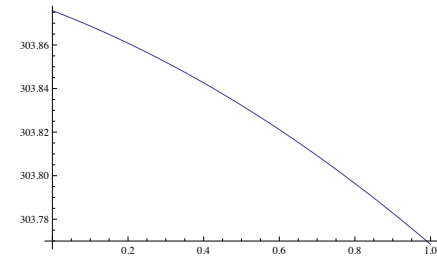

### Upper Thermal

```

thetaU = \theta U[x] /. sol /. x \to L U X
303.876 - 0.103163 X + 0.20831 (1. X - 0.5 X^2)

```

Plot[thetaU, {X, 0, 1}]

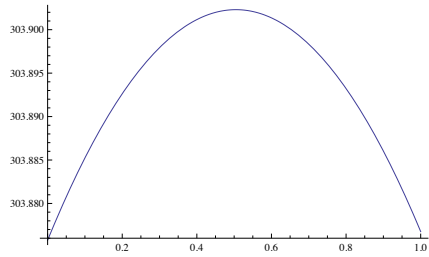

Upper Vapor Concentration

cU = c[psi, theta] /. psi -> psiU /. theta -> thetaU;

Plot[cU, {X, 0, 1}]

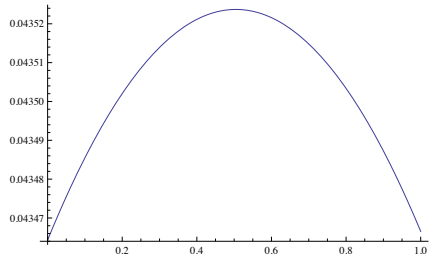

Lower Vapor Concentration

cL = c[psi, theta] /. psi -> psiL /. theta -> thetaL;

Plot[cL, {X, 0, 1}]

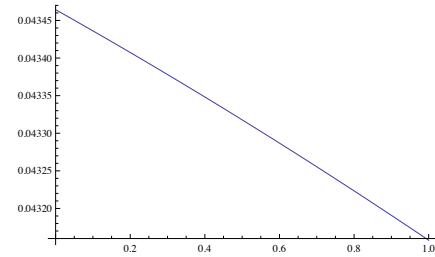

Whole leaf vapor

Show[Plot[cU /. X -> -z, {z, 0, -1}], Plot[cL, {X, 0, 1}], PlotRange -> All]

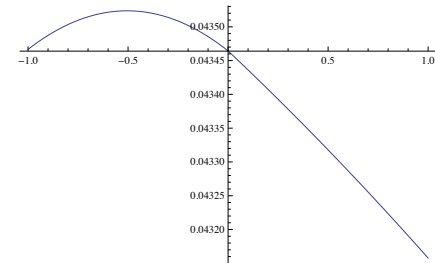

Whole leaf temperature

Show[Plot[thetaU /. X -> -z, {z, 0, -1}], Plot[thetaL, {X, 0, 1}], PlotRange -> All]

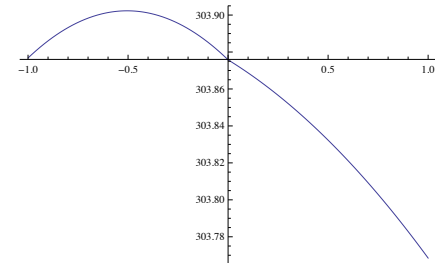

## Whole leaf potential

```
Show[Plot[psiU /. X -> -z, {z, 0, -1}], Plot[psiL, {X, 0, 1}],
ListPlot[{{0, psi}, {0, psi /. sol}}, Joined -> True],
AxesOrigin -> {-1.1, psi /. sol}, PlotRange -> All]
```

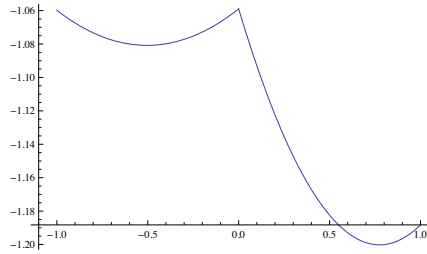

## Export plot data

```
position = Range[-1, 1, .01];

outpos = Table[0, {Length[position]}];
potential = Table[0, {Length[position]}];
vapor = Table[0, {Length[position]}];
temperature = Table[0, {Length[position]}];

Do[
  If[NonNegative[position[[i]]], potential[[i]] = psiL /. X -> position[[i]],
    potential[[i]] = psiU /. X -> -position[[i]],
    {i, Length[position]}]
Do[
  If[NonNegative[position[[i]]],
    vapor[[i]] = cL /. X -> position[[i]], vapor[[i]] = cU /. X -> -position[[i]],
    {i, Length[position]}]
Do[
  If[NonNegative[position[[i]]], temperature[[i]] = thetaL /. X -> position[[i]],
    temperature[[i]] = thetaU /. X -> -position[[i]],
    {i, Length[position]}]
Do[
  If[NonNegative[position[[i]]],
    outpos[[i]] = L * position[[i]], outpos[[i]] = LU * position[[i]],
    {i, Length[position]}]

opdata = Transpose[{outpos, potential}];
otdata = Transpose[{outpos, temperature}];
ocdata = Transpose[{outpos, vapor}];
```

```
ListPlot[opdata, Joined -> True]
```

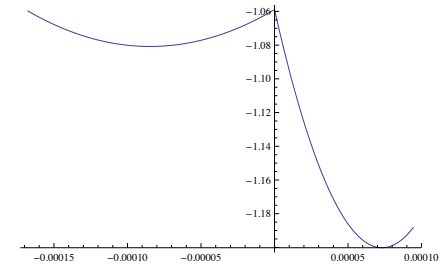

```
ListPlot[ocdata, Joined -> True]
```

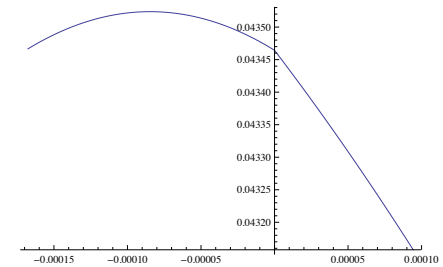

```
ListPlot[otdata, Joined -> True]
```

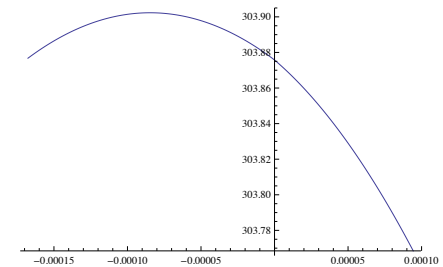

```
SetDirectory[ToFileName[NotebookDirectory[]]]
```

```
/Users/Tony/Dropbox/Manuscripts/Active manuscripts/vapor and liquid/mol
fraction/stomatal g function of wp/Hypothetical 15 80 AF oak gs
```

```
outfile = "sim_Q0_"  
sim_Q0_  
  
Export[outfile <> "potential.xls", opdata]  
sim_Q0_potential.xls  
  
Export[outfile <> "vapor.xls", ocddata]  
sim_Q0_vapor.xls  
  
Export[outfile <> "temperature.xls", otdata]  
sim_Q0_temperature.xls
```
