# Supplementary material
Source: PubMed Central journal article supplement (PMC3982738)
Supplement: supp_pp.114.236323_236323Supplemental_Text_S8.pdf [file supp_pp.114.236323_236323Supplemental_Text_S8.pdf]

```
Remove["Global`*"]
```

## Evaporative flux lab experiment: low load

### Fixed Parameter and initial values that update

```
For in lab, set cloud=1, gs choked, psir=-.05
```

```
gs = 0.05 (* conserved value based on Li-cor measurements,  $\psi_{le}$  varies *)
```

```
0.05
```

```
 $\theta_{var}$  =  $\theta_{air}$ ; (*  $\theta_{air}$  *)
```

```
 $\psi_{var}$  =  $\psi_r$ ; (*  $\psi_r$  *)
```

```
vsf = .69 (* first guess*)
```

```
0.69
```

### Main Environmental variables

```
TI = 0; (* hypothetical temp inc C *)
```

```
 $\theta_{airbase}$  = 273.15 + 28.31
```

```
301.46
```

```
 $\theta_{air}$  = 273.15 + 28.31 + TI (* air temp *)
```

```
301.46
```

```
PARout = 50 (* PARo  $\mu\text{mol m}^{-2} \text{s}^{-1}$  *)
```

```
50
```

```
cloud = 1 (* fraction sky cloudy *)
```

```
1
```

```
windspeed = 3.86 (* Logan airport mean for day m s-1 *)
```

```
3.86
```

```
 $\psi_r$  = -.01 (* stem potential from cov'd leaf in mpa *)
```

```
-0.01
```

### Environmental parameters

```
R = 8.3145; (* gas constant Joules per mole per Kelvin *)
```

```
Patm = 1.013  $\times 10^5$ ; (* atm pressure in Pa *)
```

```
 $\theta_{sur}$  =  $\theta_{air}$ ;
```

```
 $\chi_a[\text{relh}_-, \theta_-] := \text{relh} \left( 1.28 \frac{R 298.15}{\text{Patm}} \text{Exp} \left[ -\frac{44000}{R} \left( \frac{1}{\theta} - \frac{1}{298.15} \right) \right] \right)$ 
```

```
cvbase = .437  $\left( 1.28 \frac{298.15}{\theta_{airbase}} \text{Exp} \left[ -\frac{44000}{R} \left( \frac{1}{\theta_{airbase}} - \frac{1}{298.15} \right) \right] \right)$ 
```

```
(* wv conc conserved as temp inc *)
```

```
0.672255
```

```
cvcase = 1.28  $\frac{298.15}{\theta_{air}} \text{Exp} \left[ -\frac{44000}{R} \left( \frac{1}{\theta_{air}} - \frac{1}{298.15} \right) \right]$ 
```

```
(* wvc that would be satur at new temp *)
```

```
1.53834
```

```
RH = cvbase / cvcase (* new rh due to old wvc at new temp *)
```

```
0.437
```

```
 $\chi_{air}$  =  $\chi_a[\text{RH}, \theta_{air}]$  (* new chi from new rh *)
```

```
0.0166338
```

```
asr = 0.4 (* absorbance over all solar PAR+NIR, 400 to 3000 nm, range .4 to .6 *)
```

```
0.4
```

```
r = 0.15 (* reflectance of surroundings to solar radiation Nobel *)
```

```
0.15
```

```
Assimilation = 19.7  $\times 10^{-6}$  (* mol m-2 s-1 *)
```

```
0.0000197
```

```
AE = 479000 * Assimilation (* 479 kJ per mole co2 fixed, J m-2 s-1 *)
```

```
FE = .01 asr  $\left( \frac{1}{.45} * \text{PARout} * 10^{-6} * 2.35 * 10^5 \right) (1+r)$ 
```

```
(* J m-2 s-1 Energy lost to fluorescence, 3% of abs vis *)
```

```
9.4363
```

```
0.120111
```

```
SRsun = asr  $\left( \frac{1}{.45} * \text{PARout} * 10^{-6} * 2.35 * 10^5 \right) (1+r) - AE - FE$ 
```

```
(* neglect refelctance *)
```

```
(* coeff J mol-1,
```

```
from Campbell intro env biophysics p 151: Total E incident is about 2x E in PAR,
```

```
then typical leaf abs is about half that amount,
```

```
so PAR plus NIR about equal to all E in PAR. OR 2.22 = 1/.45 is factor
```

```
mult PAR campbell but also could subtract ps E at 479 kj per mol co2,
```

```
and then fluorescence too. ps here is 20  $\mu\text{mol m}^{-2} \text{s}^{-2}$  so -10 watts*)
```

```
2.4547
```

## Physical quantities

```

Po = 1.28 R 298.15 * 10^(-6) (* ref vapor pressure MPA *)
0.00317308

Pa = Patm * 10^-6 (* atm pressure in MPa*)
0.1013

c[ψ, θ] := 1.28 * (Patm / R) * Exp[-(44000 / R) * (1/θ - 1/298.15)]
Exp[(ψ + Pa - Po) / (R * θ)] (*mol fraction for psi in MPa*)

Cvθ = ∂θ c[ψvar, θ] /. θ → θvar (* linearization of dx/dT 1/k *)
Cvψ = ∂ψ c[ψ, θvar] /. ψ → ψvar (* linearization of dx/dpsi 1/mpa *)
0.00221782
0.000274585

λ = 44000 - 43 (θvar - 298.15) (* Joules per Mol*)
43857.7

Dv = (Patm / R) * 2.13 * ((θvar / 273.15)^1.8) *
10^(-5) (* cDv for mol frac drving force out of leaf *)
0.00102805

kvh = .026; (* heat cond air J m-2 s-1 K-1*)

σ = 5.670373 * 10^(-8); (*stefan boltzmann J/m2/s/kelvin-4 *)

F = 1; (*view factor radiative from leaf*)

eac = 1.72 * ((Patm * χα[RH, θair] / 1000 θair)^1/7)
(*.32 rh logan airport,vapor pressure is in kpa, campbell p 162*)
0.819831

ealt = .553 * ((Patm * χα[RH, θair] / 100)^1/7) (* Brutsaert 1975*)
0.827854

ealt2 = 1.24 * ((Patm * χα[RH, θair] / 100 θair)^1/7) (* Brutsaert 1975*)
0.821249

```

```

ebrunt = .51 + .066 * ((Patm * χα[RH, θair] / 100)^1/2)
0.780922

ea = (1 - .84 cloud) eac + .84 cloud (* campbell p 162*)
0.971173

```

## Leaf parameters temp corrected

```

vcx = 1 + 0.024 TI (* xylem, see viscosity corr xls*)
1.

vct = 1 + .0812 TI (* tissue *)
1.

(*vcx=1/(1- 0.024 TI) (* xylem, for temp drop*)*)
(*vct=1/(1- .0812 TI) (* tissue for temp drop*)*)

e1 = 0.96 (* emissivity leaf *)
0.96

α1 = e1 (* long wave abs leaf *)
0.96

charlength = .1 (* length normal to wind, m *)
0.1

δ = 4 * ((charlength / windspeed)^1/2) * 10^(-3) (* in m: cuvette leaf boundary layer*)
0.000643823

A1 = .4 (* .1263 oakair fraction, say 0.5 just mesophyll*)
Av = 1 - A1; (*Area fraction tissue in leaf from 2011 data 12.63%*)
0.4

A1L = .8; (* .1263 oakair fraction, say 0.5 just mesophyll*)
AUv = 1 - A1L; (*Area fraction tissue in leaf from 2011 data 12.63%*)

L = .72 * 131 * 10^(-6) (*-20 10^(-6)*)
0.00009432

LU = 1.28 * 131 * 10^(-6)
0.00016768

Check whole leaf air fraction

```

```

LAv + LU AUv
L + LU (*vol weighted area fractions *)
0.344

klh = .28614; (* heat cond tissue*)

ktotal = vct 6.45 * 10^(-7); (* hyd cond leaf mol/m/s/mpa *)

kl = (ktotal - .1263 Dv Cvψ) / (1 - .1263)
(* hyd cond tissue recon from on tree hydration (leaf at air temp)*)
6.97433 * 10^-7

H = .021; (* mol/m2/s/MPa from vein cutting, no steady state 1D scale factor *)

HA = vcx H vsf (* adj for viscosity (vcx) and 3D (vsf)*)
0.01449

```

### Absorbed radiation

```

Q = 0.2 * SRsun / L (* w m-3 volumetric heat source,
.2 is fraction of total abs solar rad abs in spongy *)
5205.05

QU = 0.8 * SRsun / LU
11711.4

QL (* total solar in lower half of leaf*)
0.49094

QU LU
1.96376

QL + QU LU - SRsun
0.

```

### Description of fluxes and relations to env parameters

(\*delta is from licor 1.42 mol/m2/s g\_bw, d=Dv\*C\_a/g\_bw, C\_a=40.49 mol/m3\*)

```

qsl =  $\frac{kvh}{\delta} (\theta_{le} - \theta_{air})$ ;

qsu =  $\frac{kvh}{\delta} (\theta_{ue} - \theta_{air})$ ;

qrl =  $\sigma_{el} \theta_{le}^4 - F_{al} (\sigma_{esur}^4)$ ;

qru =  $\sigma_{el} \theta_{ue}^4 - F_{al} (\sigma_{ea} \theta_{air}^4)$ ;

```

```

χ[ψ_, θ_] := 1.28  $\frac{R 298.15}{Patm} \text{Exp}\left[-\frac{44000}{R} \left(\frac{1}{\theta} - \frac{1}{298.15}\right)\right] \text{Exp}\left[\frac{(\psi + Pa - Po) 18.07}{R \theta}\right]$ 
(*for psi in MPa*)

χe = χ[ψle, θle];

gbl =  $\frac{2.13 * \left(\frac{\theta_{air}}{273.15}\right)^{1.8} * 10^{(-5)} Patm}{R \theta_{air}}$ 
(* c(tair)*Dv(Tair), boundary layer molar conductivity *)
0.00102805

gbl / δ
1.59679

Jtran =  $\left(\frac{1}{g_s} + \frac{\delta}{g_{bl}}\right)^{-1} (\chi_e - \chi_{air})$ ;

ψo = ψr - Jtran / HA

-0.01 - 3.34589  $\left(-0.0166338 + 0.0313236 e^{-5291.96 \left(-0.00335402 - \frac{1}{\theta_{le}}\right) + \frac{2.17331 (0.0981269 - \theta_{le})}{\theta_{le}}}\right)$ 

```

### First iteration

```

Πψ = 1 +  $\frac{Al k_{lh} + Av k_{vh}}{\lambda Av Dv Cv\theta}$  +
 $\frac{Al k_{lh} + Av k_{vh}}{\lambda Al k_l} \frac{Cv\psi}{Cv\theta}$  (* greater than one favors conduction over latent *)
4.48372

Πθ = 1 +  $\frac{\lambda Al k_l}{Al k_{lh} + Av k_{vh}} \frac{Av Dv Cv\theta}{Al k_l + Av Dv Cv\psi}$ 
(* greater than one favors latent over conduction *)
1.28705

ΠUψ = 1 +  $\frac{AUl k_{lh} + AUv k_{vh}}{\lambda AUv Dv Cv\theta}$  +
 $\frac{AUl k_{lh} + AUv k_{vh}}{\lambda AUl k_l} \frac{Cv\psi}{Cv\theta}$  (* greater than one favors conduction over latent *)
13.8905

ΠUθ = 1 +  $\frac{\lambda AUl k_l}{AUl k_{lh} + AUv k_{vh}} \frac{AUv Dv Cv\theta}{AUl k_l + AUv Dv Cv\psi}$ 
(* greater than one favors latent over conduction *)
1.07758

```

## Global energy conservation

$$SRsun == qsu + qru + qrl + qsl + \lambda Jtran ;$$

## Solution lower thermal field

$$\theta l[x_] := \theta o + \left( -\frac{x^2}{2L^2} + \frac{x}{L} \right) \frac{QL^2}{\pi\theta (Al\ klh + Av\ kvh)} + \left( -\frac{(qsl + qrl)L}{\pi\theta (Al\ klh + Av\ kvh)} - \frac{\lambda Al\ kl\ Jtran\ L}{\pi\theta (Al\ klh + Av\ kvh)} \frac{1}{(Al\ kl + Av\ Dv\ Cv\psi)} \right) \frac{x}{L}$$

## Solution upper thermal field

$$\theta U[x_] := \theta o + \left( -\frac{x^2}{2LU^2} + \frac{x}{LU} \right) \frac{QU\ LU^2}{\pi U\theta (AUl\ klh + AUv\ kvh)} - \left( \frac{(qsu + qru)L}{\pi U\theta (AUl\ klh + AUv\ kvh)} \right) \frac{x}{LU}$$

## Solution upper potential field

$$\psi U[x_] := \psi o + \left( -\frac{x^2}{2LU^2} - \frac{x}{LU} \right) \frac{QU\ LU^2}{\pi U\psi\ AUl\ kl\ \lambda} + \left( \frac{(qsu + qru)L}{\pi U\psi\ AUl\ kl\ \lambda} \right) \frac{x}{LU}$$

## Solution lower potential field

$$\psi l[x_] := \psi o + \left( -\frac{x^2}{2L^2} - \frac{x}{L} \right) \frac{QL^2}{\pi\psi\ Al\ kl\ \lambda} + \left( \frac{(qsl + qrl)L}{\pi\psi\ Al\ kl\ \lambda} - \frac{Jtran\ L}{\pi\psi\ Al\ kl\ \lambda} \frac{Al\ klh + Av\ kvh}{Av\ Dv\ Cv\theta} \right) \frac{x}{L}$$

## Solve system

$$\text{sol} = \text{FindRoot}\left[\left\{\frac{\theta U[L]}{\theta ue} = 1, \frac{\theta l[L]}{\theta le} = 1, SRsun == qsu + qru + qrl + qsl + \lambda Jtran, \frac{\psi l[L]}{\psi le} = 1\right\}, \left\{\{\theta o, \theta air\}, \{\theta ue, \theta air\}, \{\theta le, \theta air\}, \{\psi le, \psi r\}\right\}, \text{PrecisionGoal} \rightarrow 4\right]$$

{ $\theta o \rightarrow 300.88$ ,  $\theta ue \rightarrow 300.89$ ,  $\theta le \rightarrow 300.88$ ,  $\psi le \rightarrow -0.283297$ }

## update seed values

$$\text{Biotout} = \frac{HL(\psi o - \psi le)}{(Al\ kl + Av\ Dv\ Cv\psi)(\psi o - \psi le) + Av\ Dv\ Cv\theta(\theta o - \theta le)} /. \text{sol}$$

4.43585

$$\begin{aligned} \theta var &= \theta o /. \text{sol} \\ \psi var &= \psi o /. \text{sol} \\ &300.88 \\ &-0.0773024 \\ vsf &= (.151\ \text{Biotout} + 1.03)^{-1} (* \text{ vasc scale factor} \\ &\quad \text{steady state based on geometry of veis and eff biot number*}) \\ &0.5883 \end{aligned}$$

## Second iteration

$$\begin{aligned} Cv\theta &= \partial_\theta c[\psi var, \theta] /. \theta \rightarrow \theta var (* \text{ linearization of } dx/dT\ 1/k *) \\ Cv\psi &= \partial_\psi c[\psi, \theta var] /. \psi \rightarrow \psi var (* \text{ linearization of } dx/dpsi\ 1/mpa *) \\ &0.00215133 \\ &0.000265834 \end{aligned}$$

$$\begin{aligned} \pi\psi &= 1 + \frac{Al\ klh + Av\ kvh}{\lambda\ Av\ Dv\ Cv\theta} + \frac{Al\ klh + Av\ kvh}{\lambda\ Al\ kl} \frac{Cv\psi}{Cv\theta} (* \text{ greater than one favors conduction over latent *}) \\ &4.54815 \end{aligned}$$

$$\begin{aligned} \pi\theta &= 1 + \frac{\lambda\ Al\ kl}{Al\ klh + Av\ kvh} \frac{Av\ Dv\ Cv\theta}{Al\ kl + Av\ Dv\ Cv\psi} \\ &(* \text{ greater than one favors latent over conduction *}) \\ &1.28184 \end{aligned}$$

$$\begin{aligned} \pi U\psi &= 1 + \frac{AUl\ klh + AUv\ kvh}{\lambda\ AUv\ Dv\ Cv\theta} + \frac{AUl\ klh + AUv\ kvh}{\lambda\ AUl\ kl} \frac{Cv\psi}{Cv\theta} (* \text{ greater than one favors conduction over latent *}) \\ &14.2499 \end{aligned}$$

$$\begin{aligned} \pi U\theta &= 1 + \frac{\lambda\ AUl\ kl}{AUl\ klh + AUv\ kvh} \frac{AUv\ Dv\ Cv\theta}{AUl\ kl + AUv\ Dv\ Cv\psi} \\ &(* \text{ greater than one favors latent over conduction *}) \\ &1.07547 \end{aligned}$$

$$\begin{aligned} \text{sol} &= \text{FindRoot}\left[\left\{\frac{\theta U[L]}{\theta ue} = 1, \frac{\theta l[L]}{\theta le} = 1, SRsun == qsu + qru + qrl + qsl + \lambda Jtran, \frac{\psi l[L]}{\psi le} = 1\right\}, \left\{\{\theta o, \theta air\}, \{\theta ue, \theta air\}, \{\theta le, \theta air\}, \{\psi le, \psi r\}\right\}, \text{PrecisionGoal} \rightarrow 4\right] \\ &{\theta o \rightarrow 300.88, \theta ue \rightarrow 300.89, \theta le \rightarrow 300.88, \psi le \rightarrow -0.285234} \end{aligned}$$

## update seed values

```

Biotout = 
$$\frac{HL(\psi_o - \psi_{1e})}{(Al\ kl + Av\ Dv\ Cv\psi)(\psi_o - \psi_{1e}) + Av\ Dv\ Cv\theta(\theta_o - \theta_{1e})}$$
 /. sol
4.47777

sf = (.151 Biotout + 1.03) ^ (-1)
0.586117

 $\theta$ var =  $\theta_o$  /. sol
 $\psi$ var =  $\psi_o$  /. sol
300.88
-0.0773001

vsf = (.151 Biotout + 1.03) ^ (-1) (* vasc scale factor
steady state based on geometry of veis and eff biot number*)
0.586117

```

## Third iteration

```

Cv $\theta$  =  $\partial_\theta$  c[ $\psi$ var,  $\theta$ ] /.  $\theta \rightarrow \theta$ var (* linearization of  $d\chi/dT$  1/k *)
Cv $\psi$  =  $\partial_\psi$  c[ $\psi$ ,  $\theta$ var] /.  $\psi \rightarrow \psi$ var (* linearization of  $d\chi/d\psi$  1/mpa *)
0.00215134
0.000265835

 $\Pi\psi$  =  $1 + \frac{Al\ klh + Av\ kvh}{\lambda\ Av\ Dv\ Cv\theta} + \frac{Al\ klh + Av\ kvh}{\lambda\ Al\ kl} \frac{Cv\psi}{Cv\theta}$  (* greater than one favors conduction over latent *)
4.54814

 $\Pi\theta$  =  $1 + \frac{\lambda\ Al\ kl}{Al\ klh + Av\ kvh} \frac{Av\ Dv\ Cv\theta}{Al\ kl + Av\ kvh}$ 
(* greater than one favors latent over conduction *)
1.28184

 $\Pi U\psi$  =  $1 + \frac{Aul\ klh + AUv\ kvh}{\lambda\ AUv\ Dv\ Cv\theta} + \frac{Aul\ klh + AUv\ kvh}{\lambda\ Aul\ kl} \frac{Cv\psi}{Cv\theta}$  (* greater than one favors conduction over latent *)
14.2499

```

```

 $\Pi U\theta$  =  $1 + \frac{\lambda\ Aul\ kl}{Aul\ klh + AUv\ kvh} \frac{AUv\ Dv\ Cv\theta}{Aul\ kl + AUv\ Dv\ Cv\psi}$ 
(* greater than one favors latent over conduction *)
1.07547

sol =
FindRoot[{{ $\frac{\theta U[LU]}{\theta_{ue}}$  == 1,  $\frac{\theta l[L]}{\theta_{1e}}$  == 1, SRsun == qsu + qru + qrl + qsl +  $\lambda$  Jtran,  $\frac{\psi l[L]}{\psi_{1e}}$  == 1}},
{{ $\theta_o$ ,  $\theta_{air}$ }, { $\theta_{ue}$ ,  $\theta_{air}$ }, { $\theta_{1e}$ ,  $\theta_{air}$ }, { $\psi_{1e}$ ,  $\psi_r$ }}, PrecisionGoal -> 4]
{ $\theta_o \rightarrow 300.88$ ,  $\theta_{ue} \rightarrow 300.89$ ,  $\theta_{1e} \rightarrow 300.88$ ,  $\psi_{1e} \rightarrow -0.285234$ }

```

## update seed values

```

Biotout = 
$$\frac{HL(\psi_o - \psi_{1e})}{(Al\ kl + Av\ Dv\ Cv\psi)(\psi_o - \psi_{1e}) + Av\ Dv\ Cv\theta(\theta_o - \theta_{1e})}$$
 /. sol
4.47776

sf = (.151 Biotout + 1.03) ^ (-1)
0.586118

 $\theta$ var =  $\theta_o$  /. sol
 $\psi$ var =  $\psi_o$  /. sol
300.88
-0.0773001

vsf = (.151 Biotout + 1.03) ^ (-1) (* vasc scale factor
steady state based on geometry of veis and eff biot number*)
0.586118

```

## Fourth iteration

```

Cv $\theta$  =  $\partial_\theta$  c[ $\psi$ var,  $\theta$ ] /.  $\theta \rightarrow \theta$ var (* linearization of  $d\chi/dT$  1/k *)
Cv $\psi$  =  $\partial_\psi$  c[ $\psi$ ,  $\theta$ var] /.  $\psi \rightarrow \psi$ var (* linearization of  $d\chi/d\psi$  1/mpa *)
0.00215134
0.000265835

 $\Pi\psi$  =  $1 + \frac{Al\ klh + Av\ kvh}{\lambda\ Av\ Dv\ Cv\theta} + \frac{Al\ klh + Av\ kvh}{\lambda\ Al\ kl} \frac{Cv\psi}{Cv\theta}$  (* greater than one favors conduction over latent *)
4.54814

```

```

πθ = 1 +  $\frac{\lambda A_l k_l}{A_l k_{lh} + A_v k_{vh}}$   $\frac{A_v D_v C_v \theta}{A_l k_l + A_v D_v C_v \psi}$ 
(* greater than one favors latent over conduction *)
1.28184

πUψ = 1 +  $\frac{A_{U_l} k_{lh} + A_{U_v} k_{vh}}{\lambda A_{U_v} D_v C_v \theta}$  +
 $\frac{A_{U_l} k_{lh} + A_{U_v} k_{vh}}{\lambda A_{U_l} k_l}$   $\frac{C_v \psi}{C_v \theta}$  (* greater than one favors conduction over latent *)
14.2499

πUθ = 1 +  $\frac{\lambda A_{U_l} k_l}{A_{U_l} k_{lh} + A_{U_v} k_{vh}}$   $\frac{A_{U_v} D_v C_v \theta}{A_{U_l} k_l + A_{U_v} D_v C_v \psi}$ 
(* greater than one favors latent over conduction *)
1.07547

sol =
FindRoot[ $\left\{ \frac{\theta U[L]}{\theta_e} == 1, \frac{\theta_l[L]}{\theta_{le}} == 1, SR_{sun} == q_{su} + q_{ru} + q_{rl} + q_{sl} + \lambda J_{trn}, \frac{\psi_l[L]}{\psi_{le}} == 1 \right\}$ ,
{{θo, θair}, {θue, θair}, {θle, θair}, {ψle, ψr}}, PrecisionGoal → 4]
{θo → 300.88, θue → 300.89, θle → 300.88, ψle → -0.285234}

Biotout =  $\frac{H L (\psi_o - \psi_{le})}{(A_l k_l + A_v D_v C_v \psi) (\psi_o - \psi_{le}) + A_v D_v C_v \theta (\theta_o - \theta_{le})}$  /. sol
4.47776

sf = (.151 Biotout + 1.03) ^ (-1) (* vasc scale factor
steady state based on geometry of veis and eff biot number*)
0.586118

```

### check convergence

```

θvar - θo /. sol
-2.72848 × 10-12

ψvar - ψo /. sol
-6.51701 × 10-14

sf - vsf
-6.09072 × 10-11

```

## Results

```

ψue = ψU[LU] /. sol (* Water potential upper epidermis *)
-0.0842432

Temps = {θair, θsur, θue, θo, θle} /. sol
{301.46, 301.46, 300.89, 300.88, 300.88}

Potentials = {ψr, ψo, ψue, ψle} /. sol
{-0.01, -0.0773001, -0.0842432, -0.285234}

```

## Fluxes

```

qsu /. sol (*Sensible flux upper*)
-23.0251

qru /. sol (*Radiative flux upper*)
9.5684

qsl /. sol (*Sensible flux lower*)
-23.4096

qrl /. sol (*Radiative flux lower*)
-3.44799

λ Jtrn /. sol
42.769

Jtrn /. sol
0.000975178

```

## Leaf water potential and apparent conductance

```

LowerAvgPotential =  $\frac{1}{L} \int_0^L \psi_l[x] dx$  /. sol
-0.181336

```

```

UpperAvgPotential =  $\frac{1}{LU} \int_0^{LU} \psi_U[x] dx$  /. sol
-0.0808504

```

```

LWP =  $\frac{L \text{LowerAvgPotential} + LU \text{UpperAvgPotential}}{L + LU}$ 
-0.117025

```

## Naive view of gradients

$$K_{leaf} = \frac{J_{trn}}{\psi_r - LWP} /. sol \text{ (* Apparent conductance, mol m}^{-2} \text{ s}^{-1} \text{ MPa}^{-1} \text{ *)}$$

0.00911166

## Informed view of gradients

$$nondnumericpsiav = .721 - \frac{.219}{Biotout}$$

0.672092

$$ScaledPsiAverageLeaf = nondnumericpsiav * (\psi_r - \psi_{le}) + \psi_{le} /. sol$$

(\* cf 0.65 for oak (scaled k est on tree and leaf paper): given true psie and psir as defined in numeric simulation gives average potential in domain. Justified if 1D steady sol is scaled to 3d as it is here \*)

-0.100252

$$k_{leaf} = J_{trn} / (\psi_r - ScaledPsiAverageLeaf) /. sol$$

0.0108051

## Evaporation distribution

$$ProportionPeristomatal = \frac{-A1 \text{ kl } \partial_x \psi 1[x] /. x \rightarrow L}{J_{trn}} /. sol$$

0.629405

$$ProportionEvaporationLower = \frac{A1 \text{ kl } \psi 1''[x] L}{J_{trn}} /. sol$$

0.00252386

$$EvapOriginUpper = \frac{QU \text{ LU} - (q_{su} + q_{ru})}{\Pi U \psi \lambda J_{trn}} /. sol$$

0.0253021

$$VaporFluxintoLower = \frac{1}{J_{trn}} (-Av \text{ Dv Cv} \psi (\partial_x \psi 1[x] /. x \rightarrow 0) - Av \text{ Dv Cv} \theta (\partial_x \theta 1[x] /. x \rightarrow 0)) /. sol$$

0.368071

$$PerivascularEvap = VaporFluxintoLower - EvapOriginUpper$$

0.342769

$$ProportionPeristomatal + PerivascularEvap + EvapOriginUpper + ProportionEvaporationLower \text{ (* Check=1 *)}$$

1.

$$ApparentLength = (ProportionPeristomatal + 0.5 ProportionEvaporationLower) \text{ (* Dist from evap site to vasc *)}$$

0.630667

## Analysis

## Analyze proportion peristomatal at Lower Epidermis

$$ProportionPeristomatal = \frac{-A1 \text{ kl } \partial_x \psi 1[x] /. x \rightarrow L}{J_{trn}} /. sol$$

0.629405

$$PropPeri = \frac{-(q_{s1} + q_{r1})}{\Pi \psi J_{trn} \lambda} + \left( 1 + \frac{\lambda Av \text{ Dv Cv} \theta}{A1 \text{ klh} + Av \text{ kvh}} + \frac{Av \text{ Dv Cv} \psi}{A1 \text{ kl}} \right)^{-1} /. sol$$

0.629405

$$\frac{-(q_{s1} + q_{r1})}{\Pi \psi J_{trn} \lambda} /. sol$$

0.138072

$$\left( 1 + \frac{\lambda Av \text{ Dv Cv} \theta}{A1 \text{ klh} + Av \text{ kvh}} + \frac{Av \text{ Dv Cv} \psi}{A1 \text{ kl}} \right)^{-1} /. sol$$

0.491333

$$ProportionInternalVapor = \frac{1}{J_{trn}} (-Av \text{ Dv Cv} \psi (\partial_x \psi 1[x] /. x \rightarrow L) - Av \text{ Dv Cv} \theta (\partial_x \theta 1[x] /. x \rightarrow L)) /. sol$$

0.370595

$$ProportionPeristomatal + ProportionInternalVapor$$

1.

## Condensation on lower epidermis if following is larger than one:

$$\frac{(q_{s1} + q_{r1})}{J_{trn} \lambda} \frac{\lambda Av \text{ Dv Cv} \theta}{A1 \text{ klh} + Av \text{ kvh}} /. sol$$

-0.281014

## Origin of vapor internally transported

$$VaporFluxintoLower = \frac{-Av \text{ Dv Cv} \psi (\partial_x \psi 1[x] /. x \rightarrow 0) - Av \text{ Dv Cv} \theta (\partial_x \theta 1[x] /. x \rightarrow 0)}{J_{trn}} /. sol$$

0.368071

$$\text{ProportionEvaporationLower} = \frac{A1 \, k1 \, \psi1''[x] \, L}{J_{\text{trian}}} /. \text{sol}$$

0.00252386

$$\frac{Q \, L}{\Pi \psi \lambda \, J_{\text{trian}}} /. \text{sol} \text{ (*integrating evap 2nd derv over L *)}$$

0.00252386

$$\text{ProportionPeristomatal} + \text{VaporFluxintoLower} + \text{ProportionEvaporationLower} \text{ (* Check=1 *)}$$

1.

### Analyze evaporation in upper part of leaf

$$\text{LiquidFluxintoUpper} = \frac{-A1 \, k1 \, \partial_x \psi U[x] /. x \rightarrow 0}{J_{\text{trian}}} /. \text{sol}$$

0.0253021

$$\text{EvapOriginUpper} = \frac{Q \, U \, L \, U - (q_{\text{su}} + q_{\text{ru}})}{\Pi \psi \lambda \, J_{\text{trian}}} /. \text{sol}$$

0.0253021

$$\text{VaporFluxintoUpper} = \frac{-A \, U \, v \, D \, v \, C \, v \, \psi (\partial_x \psi U[x] /. x \rightarrow 0) - A \, U \, v \, D \, v \, C \, v \, \theta (\partial_x \theta U[x] /. x \rightarrow 0)}{J_{\text{trian}}} /. \text{sol}$$

-0.0253021

$$\text{CondensationUpperEpidermis} = \frac{-A \, U \, v \, D \, v \, C \, v \, \psi (\partial_x \psi U[x] /. x \rightarrow L \, U) - A \, U \, v \, D \, v \, C \, v \, \theta (\partial_x \theta U[x] /. x \rightarrow L \, U)}{1} /. \text{sol}$$

-0.0000215319

$$\text{FluxFromUpperEpidermis} = \frac{-A \, U \, 1 \, k1 \, \partial_x \psi U[x] /. x \rightarrow L \, U}{1} /. \text{sol}$$

0.0000215319

$$\frac{\lambda}{Q \, U \, L \, U} \frac{-A \, U \, v \, D \, v \, C \, v \, \psi (\partial_x \psi U[x] /. x \rightarrow L \, U) - A \, U \, v \, D \, v \, C \, v \, \theta (\partial_x \theta U[x] /. x \rightarrow L \, U)}{1} /. \text{sol}$$

-0.480883

$$\frac{\lambda}{q_{\text{su}} + q_{\text{ru}}} \frac{-A \, U \, v \, D \, v \, C \, v \, \psi (\partial_x \psi U[x] /. x \rightarrow L \, U) - A \, U \, v \, D \, v \, C \, v \, \theta (\partial_x \theta U[x] /. x \rightarrow L \, U)}{1} /. \text{sol}$$

0.070176

$$q_{\text{ru}} /. \text{sol}$$

9.5684

## Plots

### Lower Potential

$$\text{psiL} = \psi1[x] /. \text{sol} /. x \rightarrow L \, X$$

$$-0.0773001 - 0.207518 \, X + 0.00083213 (-1. \, X + 0.5 \, X^2)$$

$$\text{Plot}[\text{psiL}, \{X, 0, 1\}]$$

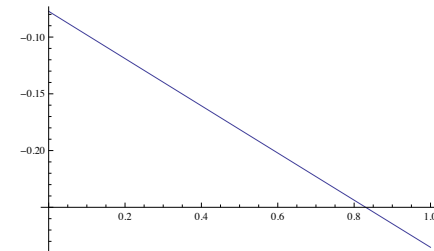

### Upper Potential

$$\text{psiU} = \psi U[x] /. \text{sol} /. x \rightarrow L \, U \, X$$

$$-0.0773001 - 0.006471 \, X + 0.000944323 (-1. \, X + 0.5 \, X^2)$$

$$\text{Plot}[\text{psiU}, \{X, 0, 1\}]$$

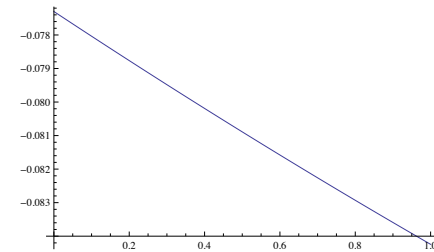

### Lower Thermal

$$\text{thetaL} = \theta1[x] /. \text{sol} /. x \rightarrow L \, X$$

$$300.88 - 0.0000445442 \, X + 0.000277759 (1. \, X - 0.5 \, X^2)$$



Plot[thetaL, {X, 0, 1}]

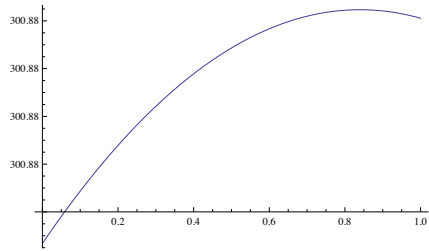

### Upper Thermal

thetaU = thetaU[x] /. sol /. x -> LU X

$$300.88 + 0.00896185 X + 0.00130782 (1. X - 0.5 X^2)$$

Plot[thetaU, {X, 0, 1}]

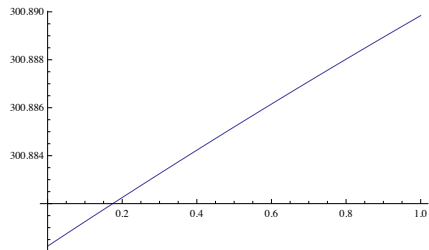

### Upper Vapor Concentration

cU = c[psi, theta] /. psi -> psiU /. theta -> thetaU;

Plot[cU, {X, 0, 1}]

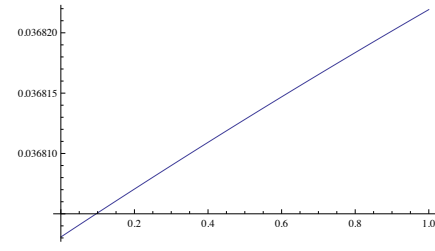

### Lower Vapor Concentration

cL = c[psi, theta] /. psi -> psiL /. theta -> thetaL;

Plot[cL, {X, 0, 1}]

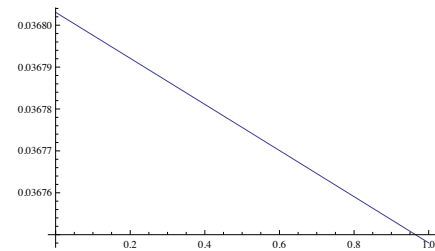

### Whole leaf vapor

Show[Plot[cU /. X -> -z, {z, 0, -1}], Plot[cL, {X, 0, 1}], PlotRange -> All]

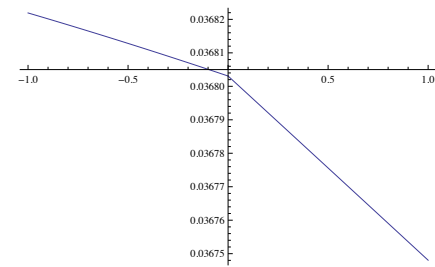

## Whole leaf temperature

```
Show[Plot[thetaU /. X -> -z, {z, 0, -1}], Plot[thetaL, {X, 0, 1}], PlotRange -> All]
```

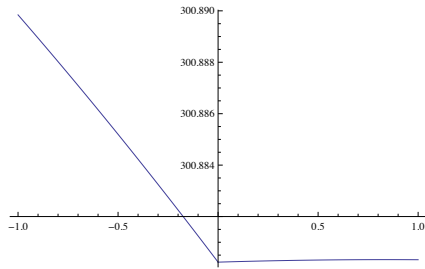

## Whole leaf potential

```
Show[Plot[psiU /. X -> -z, {z, 0, -1}], Plot[psiL, {X, 0, 1}],
ListPlot[{{0, psi}, {0, psi /. sol}}, Joined -> True],
AxesOrigin -> {-1.1, psi /. sol}, PlotRange -> All]
```

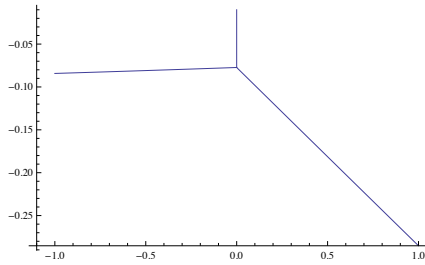

## Export plot data

```
position = Range[-1, 1, .01];
```

```
outpos = Table[0, {Length[position]}];
```

```
potential = Table[0, {Length[position]}];
vapor = Table[0, {Length[position]}];
temperature = Table[0, {Length[position]}];
```

```
Do[
  If[ NonNegative[position[[i]]], potential[[i]] = psiL /. X -> position[[i]],
    potential[[i]] = psiU /. X -> -position[[i]]],
  {i, Length[position]}]
Do[
  If[ NonNegative[position[[i]]],
    vapor[[i]] = cL /. X -> position[[i]], vapor[[i]] = cU /. X -> -position[[i]]],
  {i, Length[position]}]
Do[
  If[ NonNegative[position[[i]]], temperature[[i]] = thetaL /. X -> position[[i]],
    temperature[[i]] = thetaU /. X -> -position[[i]]],
  {i, Length[position]}]
Do[
  If[ NonNegative[position[[i]]],
    outpos[[i]] = L * position[[i]], outpos[[i]] = LU * position[[i]]],
  {i, Length[position]}]
```

```
opdata = Transpose[{outpos, potential}];
```

```
otdata = Transpose[{outpos, temperature}];
```

```
ocdata = Transpose[{outpos, vapor}];
```

```
ListPlot[opdata, Joined -> True]
```

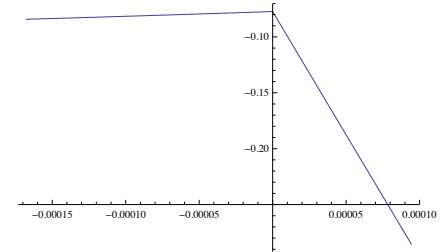

```
ListPlot[ocdata, Joined → True]
```

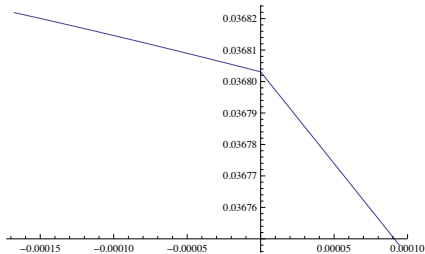

```
ListPlot[otdata, Joined → True]
```

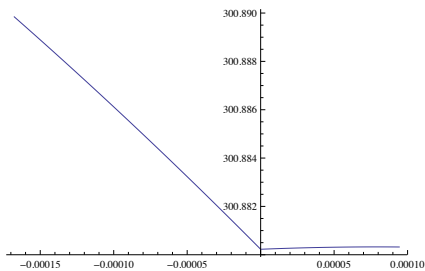

```
(*SetDirectory[ToFileName[NotebookDirectory[]] ]*)
/Users/Tony/Dropbox/Manuscripts/Active
manuscripts/vapor and liquid/mol fraction/Potometer

(*outfile="low_airy_")
low_airy_

(*Export[outfile<"potential.xls",opdata]*)
low_airy_potential.xls

(*Export[outfile<"vapor.xls",ocdata]*)
low_airy_vapor.xls

(*Export[outfile<"temperature.xls",otdata]*)
low_airy_temperature.xls
```

## Evaporative flux experiment: high load

```
Remove["Global`*"]
```

```
Remove::rmnsm : There are no symbols matching "Global`". >
```

### Fixed Parameter and initial values that update

For in lab, set cloud=1, gs choked, psir=-.05

```
gs = 0.1(* conserved value based on Li-cor measurements,  $\psi$ le varies *)
0.1
```

```
 $\theta$ var =  $\theta$ air; (*  $\theta$ air *)
 $\psi$ var =  $\psi$ r; (*  $\psi$ r *)
```

```
vsf = .69(* first guess*)
0.69
```

### Main Environmental variables

```
TI = 0; (* hypothetical temp inc C *)
```

```
 $\theta$ airbase = 273.15 + 24.31 (* WITH TEMP COMPTO MATCH LOW LOAD EP T*)
297.46
```

```
 $\theta$ air = 273.15 + 24.31 + TI (* air temp WITH TMP COMP*)
297.46
```

```
PARout = 2000 (*PARo umol m-2 s-1*)
2000
```

```
cloud = 1 (* fraction sky cloudy *)
1
```

```
windspeed = 3.86 (* Logan airport mean for day m s-1*)
3.86
```

```
 $\psi$ r = -.01; (* stem potential from cov'd leaf in mpa *)
```

### Environmental parameters

```
R = 8.3145; (*gas constant Joules per mole per Kelvin*)
```

```
Patm = 1.013 × 105; (*atm pressure in Pa*)
```

```
 $\theta$ sur =  $\theta$ air;
```

```


$$\chi_a[\text{relh}_-, \theta_-] := \text{relh} \left( 1.28 \frac{R 298.15}{P_{\text{atm}}} \text{Exp} \left[ -\frac{44000}{R} \left( \frac{1}{\theta} - \frac{1}{298.15} \right) \right] \right)$$

cvbase = .437  $\left( 1.28 \frac{298.15}{\theta_{\text{airbase}}} \text{Exp} \left[ -\frac{44000}{R} \left( \frac{1}{\theta_{\text{airbase}}} - \frac{1}{298.15} \right) \right] \right)$ 
(* wv conc conserved as temp inc *)
0.538043

cvcase = 1.28  $\frac{298.15}{\theta_{\text{air}}} \text{Exp} \left[ -\frac{44000}{R} \left( \frac{1}{\theta_{\text{air}}} - \frac{1}{298.15} \right) \right]$ 
(* wvc that would be satur at new temp *)
1.23122

RH = cvbase / cvcase (* new rh due to old wvc at new temp *)
0.437

 $\chi_{\text{air}} = \chi_a[\text{RH}, \theta_{\text{air}}]$  (* new chi from new rh *)
0.0131363

 $\alpha_{\text{sr}} = 0.4$  (* absorbance over all solar PAR+NIR, 400 to 3000 nm, range .4 to .6 *)
0.4

r = 0.15 (* reflectance of surroundings to solar radiation Nobel *)
0.15

Assimilation =  $19.7 \times 10^{-6}$  (* mol m-2 s-1*)
0.0000197

AE = 479000 * Assimilation (* 479 kJ per mole co2 fixed, J m-2 s-1 *)
FE = .01  $\alpha_{\text{sr}} \left( \frac{1}{.45} * \text{PARout} * 10^{-6} * 2.35 * 10^5 \right) (1+r)$ 
(* J m-2 s-1 Energy lost to fluorecence, 3% of abs vis *)
9.4363
4.80444

SRsun =  $\alpha_{\text{sr}} \left( \frac{1}{.45} * \text{PARout} * 10^{-6} * 2.35 * 10^5 \right) (1+r) - \text{AE} - \text{FE}$ 
(* neglect reflectance *)
(* coeff J mol-1,
from Campbell intro env biophysics p 151: Total E incident is about 2x E in PAR,
then typical leaf abs is about half that amount,
so PAR plus NIR about equal to all E in PAR. OR 2.22 = 1/.45 is factor
mult PAR capmbell but also could subtract ps E at 479 kj per mol co2,
and then fluorecence too. ps here is 20 umol m-2 s-2 so -10 watts*)
466.204

```

## Physical quantities

```

Po = 1.28 R 298.15 * 10-6 (* ref vapor pressure MPa *)
0.00317308

Pa = Patm * 10-6 (* atm pressure in MPa*)
0.1013

 $c[\psi_-, \theta_-] := 1.28 \frac{R 298.15}{P_{\text{atm}}} \text{Exp} \left[ -\frac{44000}{R} \left( \frac{1}{\theta} - \frac{1}{298.15} \right) \right]$ 
 $\text{Exp} \left[ \frac{(\psi + P_a - P_o) 18.07}{R \theta} \right]$  (*mol fraction for psi in MPa*)

Cv $\theta$  =  $\partial_{\theta} c[\psi_{\text{var}}, \theta]$  /.  $\theta \rightarrow \theta_{\text{var}}$  (* linearization of dx/dT 1/k *)
Cv $\psi$  =  $\partial_{\psi} c[\psi, \theta_{\text{var}}]$  /.  $\psi \rightarrow \psi_{\text{var}}$  (* linearization of dx/dpsi 1/mpa *)
0.00179893
0.000219768

 $\lambda = 44000 - 43 (\theta_{\text{var}} - 298.15)$  (* Joules per Mol*)
44029.7

Dv =  $\frac{P_{\text{atm}}}{R \theta_{\text{var}}} 2.13 * \left( \frac{\theta_{\text{var}}}{273.15} \right)^{1.8} *$ 
 $10^{-5}$  (* cDv for mol frac drving force out of leaf *)
0.00101712

kvh = .026; (* heat cond air J m-2 s-1 K-1*)
 $\sigma = 5.670373 * 10^{-8}$ ; (*stefan boltzmann J/m2/s/kelvin-4 *)
F = 1; (*view factor radiative from leaf*)

 $\epsilon_{\text{ac}} = 1.72 \left( \frac{P_{\text{atm}} \chi_a[\text{RH}, \theta_{\text{air}}]}{1000 \theta_{\text{air}}} \right)^{1/7}$ 
(*.32 rh logan airport,vapor pressure is in kpa, campbell p 162*)
0.794159

 $\epsilon_{\text{alt}} = .553 \left( \frac{P_{\text{atm}} \chi_a[\text{RH}, \theta_{\text{air}}]}{100} \right)^{1/7}$  (* Brutsaert 1975*)
0.800402

 $\epsilon_{\text{alt2}} = 1.24 \left( \frac{P_{\text{atm}} \chi_a[\text{RH}, \theta_{\text{air}}]}{100 \theta_{\text{air}}} \right)^{1/7}$  (* Brutsaert 1975*)
0.795532

```

```

ebrunt = .51 + .066  $\left( \frac{\text{Patm} \times a[\text{RH}, \theta_{\text{air}}]}{100} \right)^{1/2}$ 
0.75076

ea = (1 - .84 cloud) eac + .84 cloud (* campbell p 162*)
0.967065

```

### Leaf parameters temp corrected

```

vcx = 1 + 0.024 TI (* xylem, see viscosity corr xls*)
1.

vct = 1 + .0812 TI (* tissue *)
1.

(*vcx=1/(1- 0.024 TI) (* xylem, for temp drop*)*)
(*vct=1/(1- .0812 TI) (* tissue for temp drop*)*)

e1 = 0.96 (* emissivity leaf *)
0.96

a1 = e1 (* long wave abs leaf *)
0.96

charlength = .1 (* length normal to wind, m *)
0.1

 $\delta = 4 \left( \frac{\text{charlength}}{\text{windspeed}} \right)^{1/2} * 10^{-3}$  (* in m: cuvette leaf boundary layer*)
0.000643823

A1 = .4 (* .1263 oakair fraction, say 0.5 just mesophyll*)
Av = 1 - A1; (*Area fraction tissue in leaf from 2011 data 12.63%*)
0.4

AU1 = .8; (* .1263 oakair fraction, say 0.5 just mesophyll*)
AUv = 1 - AU1; (*Area fraction tissue in leaf from 2011 data 12.63%*)

L = .72 * 131 * 10-6 * (-20 10-6) *
0.00009432

LU = 1.28 * 131 * 10-6 * (-6)
0.00016768

Check whole leaf air fraction

```

```

 $\frac{L \text{Av} + \text{LU AUv}}{L + \text{LU}}$  (*vol weighted area fractions *)
0.344

klh = .28614; (* heat cond tissue*)

ktotal = vct 6.45 * 10-7; (* hyd cond leaf mol/m/s/mpa *)

kl = (ktotal - .1263 Dv Cv $\psi$ ) / (1 - .1263)
(* hyd cond tissue recon from on tree hydration (leaf at air temp)*)
7.05927 * 10-7

H = .021; (* mol/m2/s/MPa from vein cutting, no steady state 1D scale factor *)

HA = vcx H vsf (* adj for viscosity (vcx) and 3D (vsf)*)
0.01449

```

### Absorbed radiation

```

Q = 0.2 * SRsun / L (* w m-3 volumetric heat source,
.2 is fraction of total abs solar rad abs in spongy *)
988 557.

QU = 0.8 * SRsun / LU
2.22425 * 106

QL (* total solar in lower half of leaf*)
93.2407

QU LU
372.963

QL + QU LU - SRsun
0.

```

### Description of fluxes and relations to env parameters

```

(*delta is from licor 1.42 mol/m2/s g_bw, d=Dv+C_a/g_bw, C_a=40.49 mol/m3*)

qsl =  $\frac{\text{kvh}}{\delta} (\theta_{le} - \theta_{air})$ ;

qsu =  $\frac{\text{kvh}}{\delta} (\theta_{ue} - \theta_{air})$ ;

qrl =  $\sigma e1 \theta_{le}^4 - F a1 (\sigma \theta_{sur}^4)$ ;

qru =  $\sigma e1 \theta_{ue}^4 - F a1 (\sigma \theta_{air}^4)$ ;

```

```

χ[ψ-, θ-] := 1.28  $\frac{R 298.15}{P_{atm}}$  Exp $\left[-\frac{44\,000}{R} \left(\frac{1}{\theta} - \frac{1}{298.15}\right)\right]$  Exp $\left[\frac{(\psi + P_a - P_o) 18.07}{R \theta}\right]$ 
(*for psi in MPa*)
χe = χ[ψle, θle];

gbl =  $\frac{2.13 + \left(\frac{\theta_{air}}{273.15}\right)^{1.8} * 10^{(-5)} P_{atm}}{R \theta_{air}}$ 
(* c(tair)*Dv(Tair), boundary layer molar conductivity *)
0.00101712

gbl / δ
1.57982

Jtran =  $\left(\frac{1}{g_s} + \frac{\delta}{g_{bl}}\right)^{-1} (\chi_e - \chi_{air})$ ;

ψo = ψr - Jtran / HA

-0.01 - 6.49047  $\left(-0.0131363 + 0.0313236 e^{-5291.96 \left(-0.00335402 + \frac{1}{\theta_{le}}\right) + \frac{2.17331 (0.0981269 - \theta_{le})}{\theta_{le}}}\right)$ 

```

### First iteration

```

Πψ = 1 +  $\frac{Al\ k_{lh} + Av\ k_{vh}}{\lambda\ Av\ Dv\ Cv\theta}$  +
 $\frac{Al\ k_{lh} + Av\ k_{vh}}{\lambda\ Al\ k_l} \frac{Cv\psi}{Cv\theta}$  (* greater than one favors conduction over latent *)
4.96854

Πθ = 1 +  $\frac{\lambda\ Al\ k_l}{Al\ k_{lh} + Av\ k_{vh}} \frac{Av\ Dv\ Cv\theta}{Al\ k_l + Av\ Dv\ Cv\psi}$ 
(* greater than one favors latent over conduction *)
1.25198

ΠUψ = 1 +  $\frac{AUl\ k_{lh} + AUv\ k_{vh}}{\lambda\ AUv\ Dv\ Cv\theta}$  +
 $\frac{AUl\ k_{lh} + AUv\ k_{vh}}{\lambda\ AUl\ k_l} \frac{Cv\psi}{Cv\theta}$  (* greater than one favors conduction over latent *)
16.68

ΠUθ = 1 +  $\frac{\lambda\ AUl\ k_l}{AUl\ k_{lh} + AUv\ k_{vh}} \frac{AUv\ Dv\ Cv\theta}{AUl\ k_l + AUv\ Dv\ Cv\psi}$ 
(* greater than one favors latent over conduction *)
1.06378

```

### Global energy conservation

```
SRsun == qsu + qru + qrl + qsl + λ Jtran ;
```

### Solution lower thermal field

```

θ1[x_] := θo +  $\left(-\frac{x^2}{2 L^2} + \frac{x}{L}\right) \frac{Q L^2}{\Pi\theta (Al\ k_{lh} + Av\ k_{vh})}$  +
 $\left(-\frac{(q_{sl} + q_{rl}) L}{\Pi\theta (Al\ k_{lh} + Av\ k_{vh})} - \frac{\lambda Al\ k_l Jtran L}{\Pi\theta (Al\ k_{lh} + Av\ k_{vh})} \frac{1}{(Al\ k_l + Av\ Dv\ Cv\psi)}\right) \frac{x}{L}$ 

```

### Solution upper thermal field

```

θU[x_] := θo +  $\left(-\frac{x^2}{2 LU^2} + \frac{x}{LU}\right) \frac{QU LU^2}{\Pi U\theta (AUl\ k_{lh} + AUv\ k_{vh})}$  -  $\left(\frac{(q_{su} + q_{ru}) LU}{\Pi U\theta (AUl\ k_{lh} + AUv\ k_{vh})}\right) \frac{x}{LU}$ 

```

### Solution upper potential field

```

ψU[x_] := ψo +  $\left(-\frac{x^2}{2 LU^2} + \frac{x}{LU}\right) \frac{QU LU^2}{\Pi U\psi AUl\ k_l \lambda}$  +  $\left(\frac{(q_{su} + q_{ru}) LU}{\Pi U\psi AUl\ k_l \lambda}\right) \frac{x}{LU}$ 

```

### Solution lower potential field

```

ψl[x_] := ψo +  $\left(-\frac{x^2}{2 L^2} + \frac{x}{L}\right) \frac{Q L^2}{\Pi\psi Al\ k_l \lambda}$  +  $\left(\frac{(q_{sl} + q_{rl}) L}{\Pi\psi Al\ k_l \lambda} - \frac{Jtran L}{\Pi\psi Al\ k_l \lambda} \frac{Al\ k_{lh} + Av\ k_{vh}}{Av\ Dv\ Cv\theta}\right) \frac{x}{L}$ 

```

### Solve system

```

sol =
FindRoot[ $\left\{\left\{\frac{\theta U[L]}{\theta_{ue}} = 1, \frac{\theta l[L]}{\theta_{le}} = 1, SRsun == q_{su} + q_{ru} + q_{rl} + q_{sl} + \lambda Jtran, \frac{\psi l[L]}{\psi_{le}} = 1\right\}, \right.$ 
 $\left.\left\{\{\theta_o, \theta_{air}\}, \{\theta_{ue}, \theta_{air}\}, \{\theta_{le}, \theta_{air}\}, \{\psi_{le}, \psi_r\}\right\}, PrecisionGoal \rightarrow 4\right]$ 
{θo → 301.321, θue → 301.317, θle → 301.208, ψle → -0.387611}

```

### update seed values

```

Biotout =  $\frac{H L (\psi_o - \psi_{le})}{(Al\ k_l + Av\ Dv\ Cv\psi) (\psi_o - \psi_{le}) + Av\ Dv\ Cv\theta (\theta_o - \theta_{le})}$  /. sol
2.02135

```

```

 $\theta$ var =  $\theta_0$  /. sol
 $\psi$ var =  $\psi_0$  /. sol
301.321
-0.167684

vsf = (.151 Biotout + 1.03) ^ (-1) (* vasc scale factor
steady state based on geometry of veis and eff biot number*)
0.748938

```

## Second iteration

```

Cv $\theta$  =  $\partial_{\theta}$  c[ $\psi$ var,  $\theta$ ] /.  $\theta \rightarrow \theta$ var (* linearization of  $d\chi/dT$  1/k *)
Cv $\psi$  =  $\partial_{\psi}$  c[ $\psi$ ,  $\theta$ var] /.  $\psi \rightarrow \psi$ var (* linearization of  $d\chi/d\psi$  1/mpa *)
0.00219962
0.000272189

 $\Pi\psi$  =  $1 + \frac{A1\ klh + Av\ kvh}{\lambda\ Av\ Dv\ Cv\theta} + \frac{A1\ klh + Av\ kvh}{\lambda\ A1\ kl} \frac{Cv\psi}{Cv\theta}$  (* greater than one favors conduction over latent *)
4.49491

 $\Pi\theta$  =  $1 + \frac{\lambda\ A1\ kl}{A1\ klh + Av\ kvh} \frac{Av\ Dv\ Cv\theta}{A1\ kl + Av\ Dv\ Cv\psi}$ 
(* greater than one favors latent over conduction *)
1.28613

 $\Pi U\psi$  =  $1 + \frac{A1\ klh + AUv\ kvh}{\lambda\ AUv\ Dv\ Cv\theta} + \frac{A1\ klh + AUv\ kvh}{\lambda\ A1\ kl} \frac{Cv\psi}{Cv\theta}$  (* greater than one favors conduction over latent *)
14.0481

 $\Pi U\theta$  =  $1 + \frac{\lambda\ A1\ kl}{A1\ klh + AUv\ kvh} \frac{AUv\ Dv\ Cv\theta}{A1\ kl + AUv\ Dv\ Cv\psi}$ 
(* greater than one favors latent over conduction *)
1.07664

sol =
FindRoot[{{ $\frac{\theta U[L]}{\theta ue} = 1$ ,  $\frac{\theta l[L]}{\theta le} = 1$ , SRsun == qsu + qru + qrl + qsl +  $\lambda$  Jtran,  $\frac{\psi l[L]}{\psi le} = 1$ },
{{ $\theta_0$ ,  $\theta_{air}$ }, { $\theta_{ue}$ ,  $\theta_{air}$ }, { $\theta_{le}$ ,  $\theta_{air}$ }, { $\psi_{le}$ ,  $\psi_{r}$ }}, PrecisionGoal  $\rightarrow$  4]
{ $\theta_0 \rightarrow$  301.317,  $\theta_{ue} \rightarrow$  301.314,  $\theta_{le} \rightarrow$  301.21,  $\psi_{le} \rightarrow$  -0.327861}

```

## update seed values

```

Biotout =  $\frac{HL(\psi_0 - \psi_{le})}{(A1\ kl + Av\ Dv\ Cv\psi)(\psi_0 - \psi_{le}) + Av\ Dv\ Cv\theta(\theta_0 - \theta_{le})}$  /. sol
1.46977

sf = (.151 Biotout + 1.03) ^ (-1)
0.798764

 $\theta$ var =  $\theta_0$  /. sol
 $\psi$ var =  $\psi_0$  /. sol
301.317
-0.167815

vsf = (.151 Biotout + 1.03) ^ (-1) (* vasc scale factor
steady state based on geometry of veis and eff biot number*)
0.798764

```

## Third iteration

```

Cv $\theta$  =  $\partial_{\theta}$  c[ $\psi$ var,  $\theta$ ] /.  $\theta \rightarrow \theta$ var (* linearization of  $d\chi/dT$  1/k *)
Cv $\psi$  =  $\partial_{\psi}$  c[ $\psi$ ,  $\theta$ var] /.  $\psi \rightarrow \psi$ var (* linearization of  $d\chi/d\psi$  1/mpa *)
0.00219918
0.000272132

 $\Pi\psi$  =  $1 + \frac{A1\ klh + Av\ kvh}{\lambda\ Av\ Dv\ Cv\theta} + \frac{A1\ klh + Av\ kvh}{\lambda\ A1\ kl} \frac{Cv\psi}{Cv\theta}$  (* greater than one favors conduction over latent *)
4.49533

 $\Pi\theta$  =  $1 + \frac{\lambda\ A1\ kl}{A1\ klh + Av\ kvh} \frac{Av\ Dv\ Cv\theta}{A1\ kl + Av\ Dv\ Cv\psi}$ 
(* greater than one favors latent over conduction *)
1.2861

 $\Pi U\psi$  =  $1 + \frac{A1\ klh + AUv\ kvh}{\lambda\ AUv\ Dv\ Cv\theta} + \frac{A1\ klh + AUv\ kvh}{\lambda\ A1\ kl} \frac{Cv\psi}{Cv\theta}$  (* greater than one favors conduction over latent *)
14.0504

```

```


$$\Pi\theta = 1 + \frac{\lambda A_{U1} k_l}{A_{U1} k_h + A_{Uv} k_v h} \frac{A_{Uv} D_v C_v \theta}{A_{U1} k_l + A_{Uv} D_v C_v \psi}$$

(* greater than one favors latent over conduction *)
1.07663

sol =
FindRoot[{{ $\frac{\theta U[L]}{\theta_{ue}} = 1$ ,  $\frac{\theta l[L]}{\theta_{le}} = 1$ , SRsun == qsu + qru + qrl + qsl +  $\lambda$  Jtran,  $\frac{\psi l[L]}{\psi_{le}} = 1$ }},
{{ $\theta_0$ ,  $\theta_{air}$ }, { $\theta_{ue}$ ,  $\theta_{air}$ }, { $\theta_{le}$ ,  $\theta_{air}$ }, { $\psi_{le}$ ,  $\psi_r$ }}, PrecisionGoal  $\rightarrow$  4]
{ $\theta_0 \rightarrow$  301.317,  $\theta_{ue} \rightarrow$  301.314,  $\theta_{le} \rightarrow$  301.21,  $\psi_{le} \rightarrow$  -0.32792}

```

### update seed values

```

Biotout =  $\frac{H L (\psi_0 - \psi_{le})}{(A_l k_l + A_v D_v C_v \psi) (\psi_0 - \psi_{le}) + A_v D_v C_v \theta (\theta_0 - \theta_{le})}$  /. sol
1.47031

sf = (.151 Biotout + 1.03) ^ (-1)
0.798712

 $\theta_{var} = \theta_0$  /. sol
 $\psi_{var} = \psi_0$  /. sol
301.317
-0.167815

vsf = (.151 Biotout + 1.03) ^ (-1) (* vasc scale factor
steady state based on geometry of veis and eff biot number*)
0.798712

```

### Fourth iteration

```

 $C_v \theta = \partial_\theta c[\psi_{var}, \theta]$  /.  $\theta \rightarrow \theta_{var}$  (* linearization of  $d\chi/dT$  1/k *)
 $C_v \psi = \partial_\psi c[\psi, \theta_{var}]$  /.  $\psi \rightarrow \psi_{var}$  (* linearization of  $d\chi/d\psi$  1/mpa *)
0.00219919
0.000272132

 $\Pi\psi = 1 + \frac{A_l k_h + A_v k_v h}{\lambda A_v D_v C_v \theta} + \frac{A_l k_h + A_v k_v h}{\lambda A_l k_l} \frac{C_v \psi}{C_v \theta}$  (* greater than one favors conduction over latent *)
4.49533

```

```

 $\Pi\theta = 1 + \frac{\lambda A_l k_l}{A_l k_h + A_v k_v h} \frac{A_v D_v C_v \theta}{A_l k_l + A_v D_v C_v \psi}$ 
(* greater than one favors latent over conduction *)
1.2861

 $\Pi\psi = 1 + \frac{A_{U1} k_h + A_{Uv} k_v h}{\lambda A_{Uv} D_v C_v \theta} + \frac{A_{U1} k_h + A_{Uv} k_v h}{\lambda A_{U1} k_l} \frac{C_v \psi}{C_v \theta}$  (* greater than one favors conduction over latent *)
14.0504

 $\Pi\theta = 1 + \frac{\lambda A_{U1} k_l}{A_{U1} k_h + A_{Uv} k_v h} \frac{A_{Uv} D_v C_v \theta}{A_{U1} k_l + A_{Uv} D_v C_v \psi}$ 
(* greater than one favors latent over conduction *)
1.07663

sol =
FindRoot[{{ $\frac{\theta U[L]}{\theta_{ue}} = 1$ ,  $\frac{\theta l[L]}{\theta_{le}} = 1$ , SRsun == qsu + qru + qrl + qsl +  $\lambda$  Jtran,  $\frac{\psi l[L]}{\psi_{le}} = 1$ }},
{{ $\theta_0$ ,  $\theta_{air}$ }, { $\theta_{ue}$ ,  $\theta_{air}$ }, { $\theta_{le}$ ,  $\theta_{air}$ }, { $\psi_{le}$ ,  $\psi_r$ }}, PrecisionGoal  $\rightarrow$  4]
{ $\theta_0 \rightarrow$  301.317,  $\theta_{ue} \rightarrow$  301.314,  $\theta_{le} \rightarrow$  301.21,  $\psi_{le} \rightarrow$  -0.32792}

Biotout =  $\frac{H L (\psi_0 - \psi_{le})}{(A_l k_l + A_v D_v C_v \psi) (\psi_0 - \psi_{le}) + A_v D_v C_v \theta (\theta_0 - \theta_{le})}$  /. sol
1.47031

sf = (.151 Biotout + 1.03) ^ (-1) (* vasc scale factor
steady state based on geometry of veis and eff biot number*)
0.798712

```

### check convergence

```

 $\theta_{var} - \theta_0$  /. sol
 $3.68965 \times 10^{-9}$ 

 $\psi_{var} - \psi_0$  /. sol
 $1.26746 \times 10^{-10}$ 

sf - vsf
 $5.13642 \times 10^{-8}$ 

```



## Results

```

 $\psi_{ue} = \psi U[LU] /. \text{sol} (* \text{Water potential upper epidermis} *)$ 
-0.165083

Temps = { $\theta_{air}$ ,  $\theta_{sur}$ ,  $\theta_{ue}$ ,  $\theta_o$ ,  $\theta_{le}$ } /. sol
{297.46, 297.46, 301.314, 301.317, 301.21}

Potentials = { $\psi_r$ ,  $\psi_o$ ,  $\psi_{ue}$ ,  $\psi_{le}$ } /. sol
{-0.01, -0.167815, -0.165083, -0.32792}

```

## Fluxes

```

 $q_{su} /. \text{sol} (* \text{Sensible flux upper} *)$ 
155.62

 $q_{ru} /. \text{sol} (* \text{Radiative flux upper} *)$ 
36.5536

 $q_{sl} /. \text{sol} (* \text{Sensible flux lower} *)$ 
151.444

 $q_{rl} /. \text{sol} (* \text{Radiative flux lower} *)$ 
21.9017

 $\lambda J_{tr} /. \text{sol}$ 
100.684

 $J_{tr} /. \text{sol}$ 
0.00228674

```

## Leaf water potential and apparent conductance

```

 $\text{LowerAvgPotential} = \frac{1}{L} \int_0^L \psi_1[x] dx /. \text{sol}$ 
-0.26098

 $\text{UpperAvgPotential} = \frac{1}{LU} \int_0^{LU} \psi U[x] dx /. \text{sol}$ 
-0.181366

 $\text{LWP} = \frac{L \text{LowerAvgPotential} + LU \text{UpperAvgPotential}}{L + LU}$ 
-0.210027

```

## Naive view of gradients

```

 $K_{leaf} = \frac{J_{tr}}{\psi_r - LWP} /. \text{sol} (* \text{Apparent conductance, mol m}^{-2} \text{ s}^{-1} \text{ MPa}^{-1} *)$ 
0.0114321

```

## Informed view of gradients

```

 $\text{nondnumericpsiavg} = .721 - \frac{.219}{\text{Biotout}}$ 
0.572051

 $\text{ScaledPsiAverageLeaf} = \text{nondnumericpsiavg} * (\psi_r - \psi_{le}) + \psi_{le} /. \text{sol}$ 
(* cf 0.65 for oak (scaled k est on tree and leaf paper): given true psie
and psir as defined in numeric simulation gives average potential in
domain. Justified if 1D steady sol is scaled to 3d as it is here *)
-0.146053

 $k_{leaf} = J_{tr} / (\psi_r - \text{ScaledPsiAverageLeaf}) /. \text{sol}$ 
0.0168077

```

## Evaporation distribution

```

 $\text{ProportionPeristomatal} = \frac{-A l k_l \partial_x \psi_1[x] /. x \rightarrow L}{J_{tr}} /. \text{sol}$ 
0.106603

 $\text{ProportionEvaporationLower} = \frac{A l k_l \psi_1'[x] L}{J_{tr}} /. \text{sol}$ 
0.206007

 $\text{EvapOriginUpper} = \frac{QU LU - (q_{su} + q_{ru})}{\Pi U \psi \lambda J_{tr}} /. \text{sol}$ 
0.127797

 $\text{VaporFluxintoLower} =$ 
 $\frac{1}{J_{tr}} (-A v D v C v \psi (\partial_x \psi_1[x] /. x \rightarrow 0) - A v D v C v \theta (\partial_x \theta_1[x] /. x \rightarrow 0)) /. \text{sol}$ 
0.68739

 $\text{PerivascularEvap} = \text{VaporFluxintoLower} - \text{EvapOriginUpper}$ 
0.559593

 $\text{ProportionPeristomatal} + \text{PerivascularEvap} +$ 
 $\text{EvapOriginUpper} + \text{ProportionEvaporationLower} (* \text{Check}=1 *)$ 
1.

```

```

ApparentLength = (ProportionPeristomatal + 0.5 ProportionEvaporationLower)
(* Dist from evap site to vasc *)
0.209606

```

## Analysis

### Analyze proportion peristomatal at Lower Epidermis

```

ProportionPeristomatal =  $\frac{-A1\ kl\ \partial_x\ \psi1[x] /. x \rightarrow L}{Jtran}$  /. sol
0.106603

```

```

PropPeri =  $\frac{-(qs1 + qr1)}{\Pi\psi\ Jtran\ \lambda} + \left(1 + \frac{\lambda\ Av\ Dv\ Cv\ \theta}{A1\ klh + Av\ kvh} + \frac{Av\ Dv\ Cv\ \psi}{A1\ kl}\right)^{-1}$  /. sol
0.106603

```

```

 $\frac{-(qs1 + qr1)}{\Pi\psi\ Jtran\ \lambda}$  /. sol
-0.382992

```

```

 $\left(1 + \frac{\lambda\ Av\ Dv\ Cv\ \theta}{A1\ klh + Av\ kvh} + \frac{Av\ Dv\ Cv\ \psi}{A1\ kl}\right)^{-1}$  /. sol
0.489595

```

```

ProportionInternalVapor =
 $\frac{1}{Jtran} (-Av\ Dv\ Cv\ \psi (\partial_x\ \psi1[x] /. x \rightarrow L) - Av\ Dv\ Cv\ \theta (\partial_x\ \theta1[x] /. x \rightarrow L))$  /. sol
0.893397

```

```

ProportionPeristomatal + ProportionInternalVapor
1.

```

### Condensation on lower epidermis if following is larger than one:

```

 $\frac{(qs1 + qr1)}{Jtran\ \lambda} \frac{\lambda\ Av\ Dv\ Cv\ \theta}{A1\ klh + Av\ kvh}$  /. sol
0.782263

```

### Origin of vapor internally transported

```

VaporFluxintoLower =
 $\frac{1}{Jtran} (-Av\ Dv\ Cv\ \psi (\partial_x\ \psi1[x] /. x \rightarrow 0) - Av\ Dv\ Cv\ \theta (\partial_x\ \theta1[x] /. x \rightarrow 0))$  /. sol
0.68739

```

```

ProportionEvaporationLower =  $\frac{A1\ kl\ \psi1''[x] L}{Jtran}$  /. sol
0.206007

```

```

 $\frac{QL}{\Pi\psi\ \lambda\ Jtran}$  /. sol (*integrating evap 2nd derv over L *)
0.206007

```

```

ProportionPeristomatal + VaporFluxintoLower +
ProportionEvaporationLower (* Check=1 *)
1.

```

### Analyze evaporation in upper part of leaf

```

LiquidFluxintoUpper =  $\frac{-A1\ kl\ \partial_x\ \psi U[x] /. x \rightarrow 0}{Jtran}$  /. sol
0.127797

```

```

EvapOriginUpper =  $\frac{QU\ LU - (qsu + qru)}{\Pi U\psi\ \lambda\ Jtran}$  /. sol
0.127797

```

```

VaporFluxintoUpper =
 $\frac{1}{Jtran} (-AUv\ Dv\ Cv\ \psi (\partial_x\ \psi U[x] /. x \rightarrow 0) - AUv\ Dv\ Cv\ \theta (\partial_x\ \theta U[x] /. x \rightarrow 0))$  /. sol
-0.127797

```

```

CondensationUpperEpidermis =
 $\frac{1}{1} (-AUv\ Dv\ Cv\ \psi (\partial_x\ \psi U[x] /. x \rightarrow LU) - AUv\ Dv\ Cv\ \theta (\partial_x\ \theta U[x] /. x \rightarrow LU))$  /. sol
0.000310642

```

```

FluxFromUpperEpidermis =  $\frac{-A1\ kl\ \partial_x\ \psi U[x] /. x \rightarrow LU}{1}$  /. sol
-0.000310642

```

```

 $\frac{\lambda}{QU\ LU\ 1} (-AUv\ Dv\ Cv\ \psi (\partial_x\ \psi U[x] /. x \rightarrow LU) - AUv\ Dv\ Cv\ \theta (\partial_x\ \theta U[x] /. x \rightarrow LU))$  /. sol
0.0366724

```

```

 $\frac{\lambda}{qsu + qru\ 1} (-AUv\ Dv\ Cv\ \psi (\partial_x\ \psi U[x] /. x \rightarrow LU) - AUv\ Dv\ Cv\ \theta (\partial_x\ \theta U[x] /. x \rightarrow LU))$  /. sol
0.0711722

```

```

qru /. sol
36.5536

```

## Plots

## Lower Potential

```
psiL =  $\psi$ l[x] /. sol /. x -> L X
-0.167815 - 0.081427 X + 0.157356 (-1. X + 0.5 X2)
```

```
Plot[psiL, {X, 0, 1}]
```

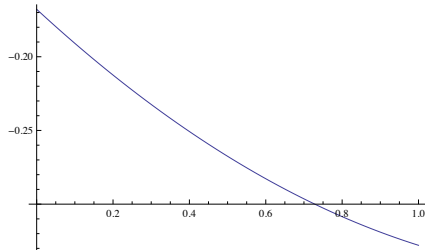

## Upper Potential

```
psiU =  $\psi$ U[x] /. sol /. x -> LU X
-0.167815 + 0.0922341 X + 0.179004 (-1. X + 0.5 X2)
```

```
Plot[psiU, {X, 0, 1}]
```

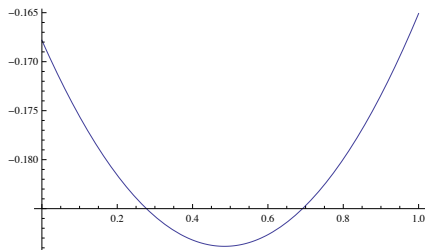

## Lower Thermal

```
thetaL =  $\theta$ l[x] /. sol /. x -> L X
301.317 - 0.133499 X + 0.0525782 (1. X - 0.5 X2)
```

```
Plot[thetaL, {X, 0, 1}]
```

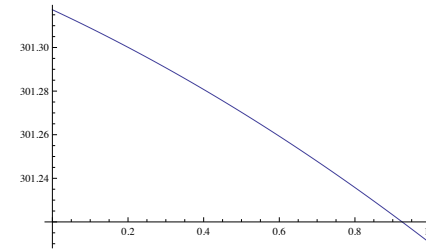

## Upper Thermal

```
thetaU =  $\theta$ U[x] /. sol /. x -> LU X
301.317 - 0.127846 X + 0.248118 (1. X - 0.5 X2)
```

```
Plot[thetaU, {X, 0, 1}]
```

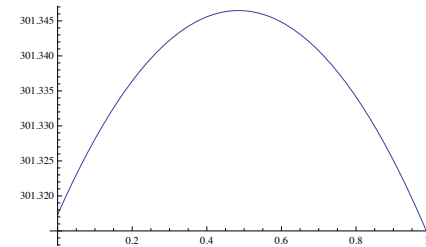

## Upper Vapor Concentration

```
cU = c[ $\psi$ ,  $\theta$ ] /.  $\psi$  -> psiU /.  $\theta$  -> thetaU;
```

`Plot[cU, {X, 0, 1}]`

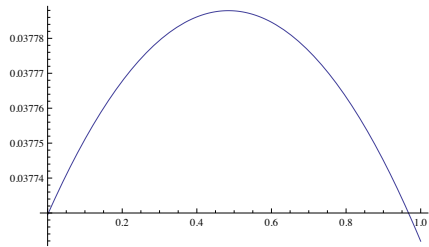

### Lower Vapor Concentration

`cL = c[ψ, θ] /. ψ → psiL /. θ → thetaL;`

`Plot[cL, {X, 0, 1}]`

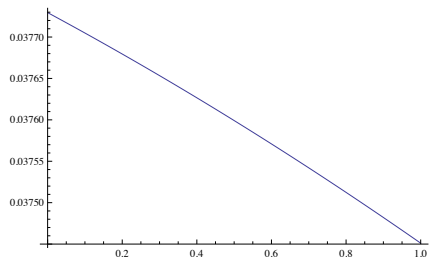

### Whole leaf vapor

`Show[Plot[cU /. X → -z, {z, 0, -1}], Plot[cL, {X, 0, 1}], PlotRange → All]`

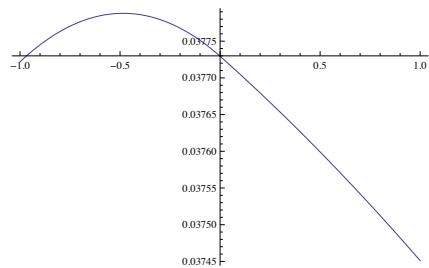

### Whole leaf temperature

`Show[Plot[thetaU /. X → -z, {z, 0, -1}], Plot[thetaL, {X, 0, 1}], PlotRange → All]`

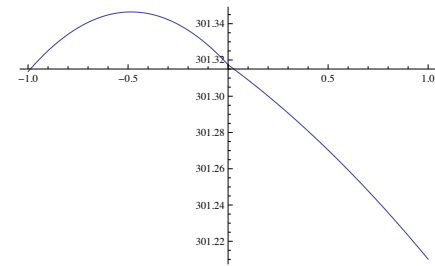

### Whole leaf potential

`Show[Plot[psiU /. X → -z, {z, 0, -1}], Plot[psiL, {X, 0, 1}], ListPlot[{{0, ψr}, {0, ψo /. sol}}, Joined → True], AxesOrigin → {-1.1, ψle /. sol}, PlotRange → All]`

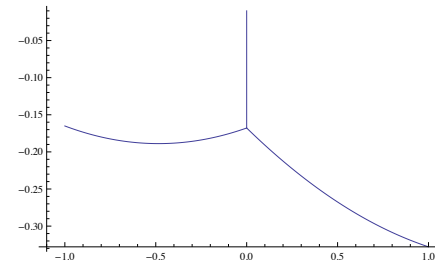

### Export plot data

`position = Range[-1, 1, .01];`

`outpos = Table[0, {Length[position]}];`

```

potential = Table[0, {Length[position]};
vapor = Table[0, {Length[position]};
temperature = Table[0, {Length[position]};

Do[
  If[ NonNegative[position[[i]]], potential[[i]] = psiL /. X -> position[[i]],
    potential[[i]] = psiU /. X -> -position[[i]],
    {i, Length[position]}]
Do[
  If[ NonNegative[position[[i]]],
    vapor[[i]] = cL /. X -> position[[i]], vapor[[i]] = cU /. X -> -position[[i]],
    {i, Length[position]}]
Do[
  If[ NonNegative[position[[i]]], temperature[[i]] = thetaL /. X -> position[[i]],
    temperature[[i]] = thetaU /. X -> -position[[i]],
    {i, Length[position]}]
Do[
  If[ NonNegative[position[[i]]],
    outpos[[i]] = L * position[[i]], outpos[[i]] = LU * position[[i]],
    {i, Length[position]}]
opdata = Transpose[{outpos, potential}];
otdata = Transpose[{outpos, temperature}];
ocdata = Transpose[{outpos, vapor}];
ListPlot[opdata, Joined -> True]

```

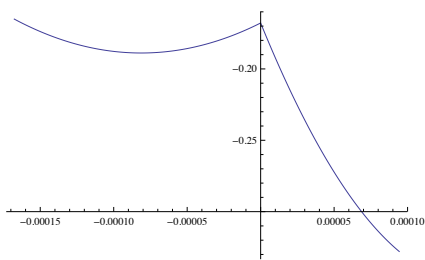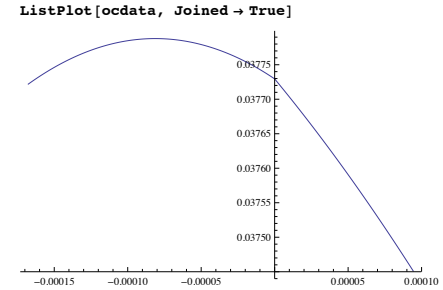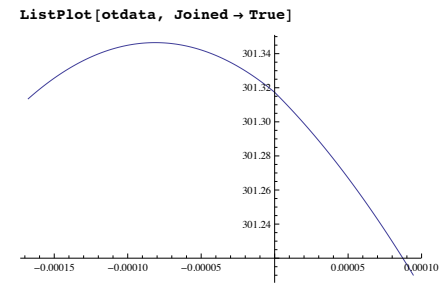

```

(*SetDirectory[ToFileName[NotebookDirectory[[]]]]*)
/Users/Tony/Dropbox/Manuscripts/Active
manuscripts/vapor and liquid/mol fraction/Potometer

(*outfile="highTC_airy_")
highTC_airy_

(*Export[outfile<"potential.xls",opdata]*)
highTC_airy_potential.xls

(*Export[outfile<"vapor.xls",ocdata]*)
highTC_airy_vapor.xls

(*Export[outfile<"temperature.xls",otdata]*)
highTC_airy_temperature.xls

```
